# Supplementary material for: Aggregation of phosphorescent Pd(ii) and Pt(ii) complexes with lipophilic counter-anions in non-polar solvents
Source: Royal Society of Chemistry journal article supplement (doi:10.1039/d2dt03415h), 2023-01-01
Supplement: d2dt03415h1.pdf [file d2dt03415h1.pdf]

**Aggregation of phosphorescent Pd(II) and Pt(II) complexes with lipophilic counter-anions in non-polar solvents**

Ning Zhou,<sup>a</sup> Chao Zou,<sup>\*ab</sup> Sa Suo,<sup>a†</sup> Yuliang Liu,<sup>a‡</sup> Jinqiang Lin,<sup>a</sup> Xiaobao Zhang,<sup>a</sup> Minglin Shi,<sup>a</sup> Xiaoyong Chang<sup>a</sup> and Wei Lu<sup>\*a</sup>

*a. Department of Chemistry, Southern University of Science and Technology, Shenzhen, Guangdong 518055, P. R. China. E-mail: luw@sustech.edu.cn.*

*b. Functional Coordination Material Group-Frontier Research Center, Songshan Lake Materials Laboratory, Dongguan, Guangdong 523808, P. R. China.*

† Current address: Department of Chemistry, Emory University, Atlanta, 30322, Georgia, USA.

‡ Current address: Division of Chemistry and Biological Chemistry, School of Physical and Mathematical Sciences, Nanyang Technological University, 637371, Singapore.

## Synthesis and Characterization

Syntheses of C<sup>^</sup>N<sup>^</sup>N (HC<sup>^</sup>N<sup>^</sup>N = 6-(2-R<sub>2</sub>,4-R<sub>1</sub>-phenyl)-2,2'-bipyridine; R<sub>1</sub> = R<sub>2</sub> = H, or F, or R<sub>1</sub> = OMe, R<sub>2</sub> = H) ligands and corresponding [(C<sup>^</sup>N<sup>^</sup>N)-Pd-Cl] and [(C<sup>^</sup>N<sup>^</sup>N)-Pt-Cl] complexes

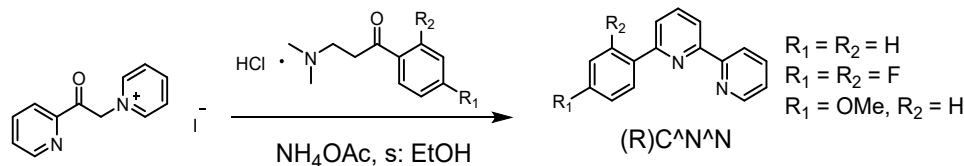

**Scheme S1.** The synthetic route for the C<sup>^</sup>N<sup>^</sup>N ligand.

As demonstrated in Scheme S1, C<sup>^</sup>N<sup>^</sup>N ligand was synthesized according to the modified literature methods.<sup>1</sup> The purities of the ligands were verified by the NMR spectra, comparing with the literature values.

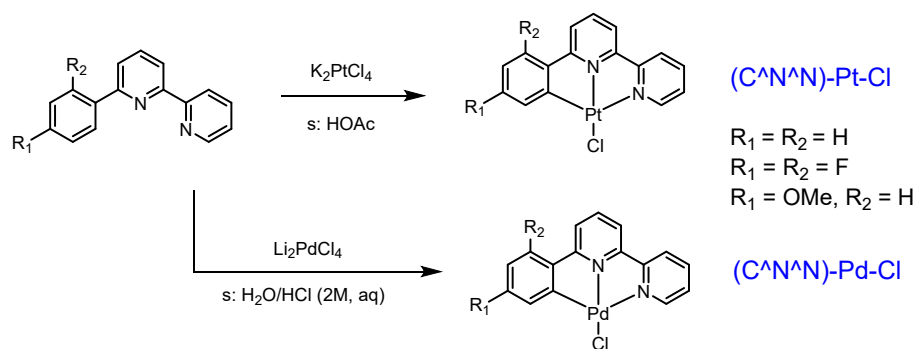

**Scheme S2.** The synthetic procedure of [(C<sup>^</sup>N<sup>^</sup>N)-Pt-Cl] and [(C<sup>^</sup>N<sup>^</sup>N)-Pd-Cl].

The synthetic procedure of [(C<sup>^</sup>N<sup>^</sup>N)-Pt-Cl] and [(C<sup>^</sup>N<sup>^</sup>N)-Pd-Cl] are illustrated in Scheme S2. [(C<sup>^</sup>N<sup>^</sup>N)-Pt-Cl] was synthesized via literature methods and confirmed by NMR spectra.<sup>1</sup> [(C<sup>^</sup>N<sup>^</sup>N)-Pd-Cl] was prepared by using corresponding ligands (1 mmol) reacting with Li<sub>2</sub>PdCl<sub>4</sub> (1 mmol, 262 mg) in aqueous solution (20 mL) containing 4 mL HCl (2 M, aq), according to the literatures.<sup>2-3</sup> After 24 h refluxing, the light yellow or yellowish green solid was obtained by filtration, washed with H<sub>2</sub>O, MeOH and Et<sub>2</sub>O successively, and dried in the air.

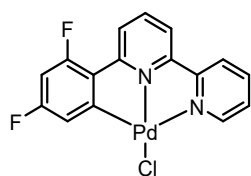

Yellowish green solid obtained (370 mg, yield: 90%).

<sup>1</sup>H NMR (500 MHz, DMSO-*d*<sub>6</sub>) δ 8.58 (d, *J* = 4.2 Hz, 1H), 8.50 (d, *J* = 8.0 Hz, 1H), 8.28 (dt, *J* =

7.8, 3.0 Hz, 2H), 8.19 (t,  $J = 8.0$  Hz, 1H), 7.86 (d,  $J = 7.9$  Hz, 1H), 7.83 – 7.74 (m, 1H), 7.06 (dd,  $J = 7.9, 2.4$  Hz, 1H), 6.97 (s, 1H).  $^{19}\text{F}$  NMR (376 MHz, DMSO)  $\delta$  -105.75 (d,  $J = 8.9$  Hz), -109.76 (d,  $J = 8.9$  Hz).

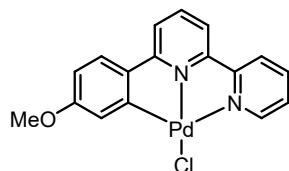

Yellowish green solid obtained (320 mg, yield: 80%).

$^1\text{H}$  NMR (500 MHz, DMSO- $d_6$ )  $\delta$  8.65 (d,  $J = 4.2$  Hz, 1H), 8.50 (d,  $J = 8.0$  Hz, 1H), 8.27 (td,  $J = 7.9, 1.6$  Hz, 1H), 8.18 – 8.07 (m, 2H), 7.90 (dd,  $J = 7.6, 1.1$  Hz, 1H), 7.83 – 7.75 (m, 1H), 7.61 (d,  $J = 8.5$  Hz, 1H), 7.09 (d,  $J = 2.6$  Hz, 1H), 6.67 (dd,  $J = 8.5, 2.6$  Hz, 1H), 3.77 (s, 3H).

#### Synthesis of 2-ethynyl-1,3-dimethyl-1*H*-imidazol-3-ium triflate (*N*-heterocyclic allenylidene precursor)<sup>4</sup>

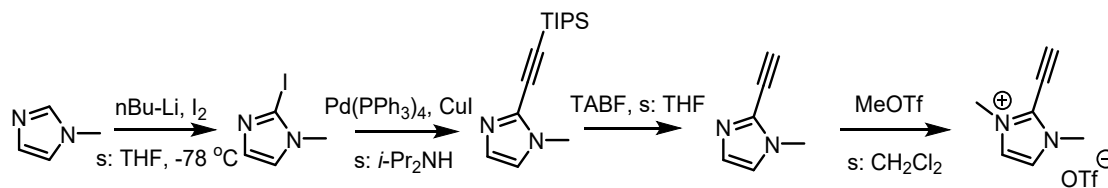

**Scheme S3.** The synthetic procedure of 2-ethynyl-1,3-dimethyl-1*H*-imidazol-3-ium triflate.

1-methyl-1*H*-imidazole (36.5 mmol, 3.0 g) was dissolved in THF (100 mL). *n*-BuLi (2.5 M in hexane, 18 mL) was added dropwisely at  $-78$  °C. After stirring for 2 h, the temperature was raised to  $-60$  °C and  $\text{I}_2$  (43.8 mmol, 11.12 g) in THF (40 mL) was added slowly. The mixture was stirring at RT for another 16 h and the reaction was quenched by  $\text{Na}_2\text{S}_2\text{O}_3$  (aq, saturated). Organic phase was collected by extraction with  $\text{CH}_2\text{Cl}_2$  and dried over anhydrous  $\text{Na}_2\text{SO}_4$ . After evaporation under reduced pressure, the light yellow solid was collected. Recrystallization from  $\text{CH}_2\text{Cl}_2$  and hexane gave pure 2-iodo-1-methyl-1*H*-imidazole (5.86 g).  $^1\text{H}$  NMR (500 MHz,  $\text{CD}_3\text{CN}$ )  $\delta$  7.18 (d,  $J = 0.9$  Hz, 1H), 6.98 (d,  $J = 0.9$  Hz, 1H), 3.60 (s, 3H).

2-iodo-1-methyl-1*H*-imidazole (10 mmol, 2.32 g),  $\text{Pd}(\text{PPh}_3)_4$  (0.5 mmol, 580 mg) and CuI (1 mmol, 190 mg) were dissolved in *i*-Pr $_2$ NH (50 mL) under  $\text{N}_2$ . After degassed ethynyltriisopropylsilane (12

mmol, 2.7 mL) was added, the reaction was kept stirring at RT for 48 h under N<sub>2</sub> atmosphere. The filtrate was collected and concentrated to dryness. EA was added and organic phase was washed with NaCl (aq, saturated) for 3 times, dried over anhydrous Na<sub>2</sub>SO<sub>4</sub>. EA was evaporated and 1-methyl-2-((triisopropylsilyl)ethynyl)-1H-imidazole (1.78 g) was gained as light yellow oil after column chromatography (SiO<sub>2</sub>, eluent: Hex : EA = 10 : 1). <sup>1</sup>H NMR (400 MHz, CDCl<sub>3</sub>) δ 7.08 (d, *J* = 1.2 Hz, 1H), 6.97 (d, *J* = 1.2 Hz, 1H), 3.78 (s, 3H), 1.14 (d, *J* = 4.0 Hz, 21H).

To a THF (5 mL) solution of 1-methyl-2-((triisopropylsilyl)ethynyl)-1H-imidazole (1 mmol, 262 mg), TBAF (2 mL, 1.0 mol/L in THF) was added. After the mixture was stirring at RT for 1 h, water (5 mL) was added and extracted with CH<sub>2</sub>Cl<sub>2</sub> (20 mL). The organic phase was collected, washed with NaCl (aq, saturated) and dried over anhydrous Na<sub>2</sub>SO<sub>4</sub>. Light yellow oil collected after solvent was removed under reduced pressure at low temperature, was used directly by redissolving in CH<sub>2</sub>Cl<sub>2</sub> (10 mL) at -40 °C. After methyl trifluoromethanesulfonate (excess) was added, the reaction was kept at -40 °C for 0.5 h. The target product 2-ethynyl-1,3-dimethyl-1*H*-imidazol-3-ium triflate (*N*-heterocyclic allenylidene precursor) was collected by filtration, washed with few Et<sub>2</sub>O, dried under vacuum and stored in the fridge.

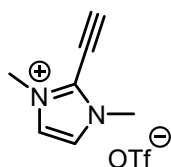

Light brown solid (120 mg).

<sup>1</sup>H NMR (500 MHz, CD<sub>3</sub>CN) δ 7.43 (s, 2H), 4.75 (s, 1H), 3.87 (s, 6H). IR (KBr) 2126 cm<sup>-1</sup> (C≡C).

#### Synthesis of the lipophilic anion (LA): sodium 2,3,4-tris(dodecyloxy)benzenesulfonate<sup>5-6</sup>

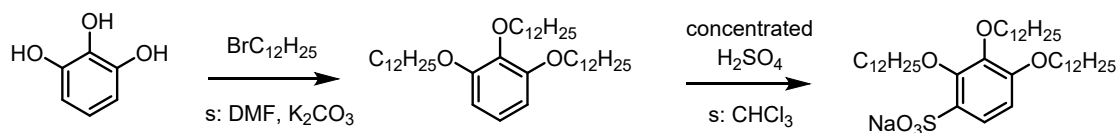

**Scheme S4.** The synthetic procedure of sodium 2,3,4-tris(dodecyloxy)benzenesulfonate.

NaLA was prepared according to the modified literature method.<sup>5-6</sup>

Pyrogallol (80 mmol, 10.1 g) and K<sub>2</sub>CO<sub>3</sub> were added to DMF (125 mL) and the temperature was

raised to 60 °C. Then BrC<sub>12</sub>H<sub>25</sub> (260 mmol, 62.4 mL) was added dropwisely to the system and the reaction was kept stirring at 60 °C overnight. The mixture was cooled and poured into ice water and the precipitate was collected by filtration. Nearly quantitative yield of 1,2,3-tris(dodecyloxy)benzene was obtained as pale white solid after recrystallization from acetone. <sup>1</sup>H NMR (500 MHz, CDCl<sub>3</sub>) δ 6.93 (t, *J* = 8.3 Hz, 1H), 6.56 (d, *J* = 8.3 Hz, 2H), 3.98 (dt, *J* = 8.8, 6.6 Hz, 6H), 1.80 (ddd, *J* = 16.6, 14.6, 7.3 Hz, 6H), 1.53 – 1.44 (m, 6H), 1.37 – 1.25 (m, 48H), 0.90 (t, *J* = 7.0 Hz, 9H).

Concentrated H<sub>2</sub>SO<sub>4</sub> (3 mL) was added to the 10 mL CHCl<sub>3</sub> solution of 1,2,3-tris(dodecyloxy)benzene (1.6 mmol, 1.01 g). The reaction mixture heated at 40 °C for 15 min, then slowly poured into ice water. The pH of the solution was adjusted to 12 by adding NaOH (aq) with NaCl (aq). After stirring for 0.5 h, the reaction mixture was extracted with EA (50 mL) for 3 times. The organic layer was dried over anhydrous Na<sub>2</sub>SO<sub>4</sub>. The organic layer was concentrated and purified by column chromatography (SiO<sub>2</sub>) with eluent EA and EtOH subsequently. The white solid (980 mg) was obtained.

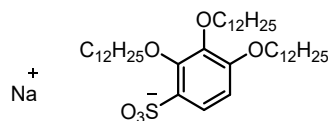

**NaLA**

<sup>1</sup>H NMR (500 MHz, DMSO) δ 7.33 (d, *J* = 8.7 Hz, 1H), 6.63 (d, *J* = 8.8 Hz, 1H), 3.94 (dt, *J* = 8.4, 6.4 Hz, 4H), 3.83 (t, *J* = 6.4 Hz, 2H), 1.68 (dt, *J* = 14.5, 7.3 Hz, 6H), 1.48 – 1.38 (m, 6H), 1.25 (m, 48H), 0.85 (m, 9H).

### **General synthetic procedure of the tridentate cyclometallated *N*-heterocyclic allenylidene complexes<sup>7</sup>**

PF<sub>6</sub> anion:

*N*-heterocyclic allenylidene precursor (0.16 mmol, 44 mg) and Ag<sub>2</sub>O (0.2 mmol, 48 mg) were added to 15 mL CH<sub>3</sub>CN and the mixture was stirred under N<sub>2</sub> at RT overnight, protected from light. The filtrate was collected after filtration through celite. [R(C<sup>^</sup>N<sup>^</sup>N)-M-Cl] (M = Pd/Pt, 0.1 mmol) was then added to the solution. The reaction system was kept stirring under N<sub>2</sub> for another 12 h at RT, protected from light. Filtrate collected after filtration through celite was concentrated and

redissolved in 5 mL MeOH. The methanolic solution was added dropwisely to 20 mL saturated  $\text{NH}_4\text{PF}_6$  (aq) and the mixture was stirred for 0.5 h. The final product was obtained after filtration and column chromatography (neutral  $\text{Al}_2\text{O}_3$ , eluent:  $\text{CH}_3\text{CN}$ ).

Lipophilic anion:

Metal complexes with  $\text{PF}_6$  counter anion (0.04 mmol) was dissolve in minimum of  $\text{CH}_3\text{CN}$  and NaLA (0.039 mmol) in  $\text{CH}_2\text{Cl}_2$  was added. After stirring at room temperature for 2 hours,  $\text{H}_2\text{O}$  was added. The organic phase was collected, washed with  $\text{H}_2\text{O}$  three times and dried over  $\text{Na}_2\text{SO}_4$ . The final product was obtained by removing the solvent and recrystallized in hot DMSO.

### Complexes characterization

**Pt-1- $\text{PF}_6$**  Green solid (yield: 80%). Orange crystals can be obtained by slow evaporation in  $\text{CH}_3\text{CN}$  solutions.

$^1\text{H}$  NMR (500 MHz,  $\text{DMSO}-d_6$ )  $\delta$  8.87 (dd,  $J = 5.2, 1.5$  Hz, 1H), 8.49 (d,  $J = 7.9$  Hz, 1H), 8.32 (td,  $J = 7.8, 1.6$  Hz, 1H), 8.22 (d,  $J = 7.8$  Hz, 1H), 8.11 (t,  $J = 8.0$  Hz, 1H), 8.01 (d,  $J = 8.0$  Hz, 1H), 7.79 (ddd,  $J = 7.7, 5.3, 1.3$  Hz, 1H), 7.66 – 7.60 (m, 3H), 7.59 – 7.52 (m, 1H), 7.13 – 7.05 (m, 2H), 3.87 (s, 6H).  $^{13}\text{C}$  NMR (126 MHz,  $\text{DMSO}-d_6$ )  $\delta$  163.97, 157.36, 154.51, 151.12, 147.19, 141.30, 140.73, 140.68, 137.03, 136.31, 131.78, 131.10, 128.89, 125.44, 124.47, 124.39, 121.42, 119.72, 119.64, 83.89, 35.43.  $^{19}\text{F}$  NMR ( $\text{CD}_3\text{CN}$ , 376 MHz)  $\delta$  -72.94;  $^{31}\text{P}$  NMR (202 MHz,  $\text{CD}_3\text{CN}$ )  $\delta$  -144.64; HR-MS (ESI):  $m/z = 546.12524$ ,  $[\text{C}_{23}\text{H}_{19}\text{N}_4\text{Pt}]^+$ , calc. for  $[\text{C}_{23}\text{H}_{19}\text{N}_4\text{Pt}]^+$   $m/z = 546.1257$ ; HR-MS (ESI):  $m/z = 144.96375$ ,  $[\text{PF}_6]^-$ , calc. for  $[\text{PF}_6]^-$   $m/z = 144.9647$ . Anal. Calcd for  $\text{C}_{23}\text{H}_{19}\text{N}_4\text{PtPF}_6$ : C, 39.97; H, 2.93; N, 8.11; Found: C, 39.48; H, 2.29; N, 7.89.

**Pt-1-LA** Green solid (yield: 40%).

$^1\text{H}$  NMR (400 MHz,  $\text{DMSO}-d_6$ )  $\delta$  8.98 (d,  $J = 4.3$  Hz, 1H), 8.59 (d,  $J = 8.0$  Hz, 1H), 8.41 (t,  $J = 7.9$  Hz, 1H), 8.31 (d,  $J = 7.9$  Hz, 1H), 8.21 (t,  $J = 8.0$  Hz, 1H), 8.10 (d,  $J = 7.9$  Hz, 1H), 7.91 – 7.84 (m, 1H), 7.72 (d,  $J = 7.1$  Hz, 1H), 7.68 – 7.61 (m, 3H), 7.33 (d,  $J = 8.7$  Hz, 1H), 7.19 – 7.09 (m, 2H), 6.63 (d,  $J = 8.8$  Hz, 1H), 3.92 (m, 9H), 3.83 (t,  $J = 6.4$  Hz, 3H), 1.76 – 1.58 (m, 6H), 1.25 (m, 48H), 0.85 (t,  $J = 6.7$  Hz, 9H);  $^{19}\text{F}$  NMR (376 MHz, DMSO) no signal;  $^{31}\text{P}$  NMR (202 MHz, DMSO) no signal; HR-MS (ESI):  $m/z = 546.12512$ ,

$[\text{C}_{23}\text{H}_{19}\text{N}_4\text{Pt}]^+$ , calc. for  $[\text{C}_{23}\text{H}_{19}\text{N}_4\text{Pt}]^+$   $m/z = 546.1257$ ; HR-MS (ESI):  $m/z = 709.54468$ ,  
 $[\text{C}_{42}\text{H}_{77}\text{O}_6\text{S}]^-$ , calc. for  $[\text{C}_{42}\text{H}_{77}\text{O}_6\text{S}]^-$   $m/z = 709.5446$ .

**Pd-2-PF<sub>6</sub>** Orange solid (yield: 38%)

<sup>1</sup>H NMR (600 MHz, DMSO-*d*<sub>6</sub>)  $\delta$  8.66 (dd,  $J = 5.2, 1.6$  Hz, 1H), 8.51 (d,  $J = 8.1$  Hz, 1H), 8.32 – 8.24 (m, 2H), 8.19 (t,  $J = 8.0$  Hz, 1H), 7.89 (d,  $J = 8.1$  Hz, 1H), 7.76 (ddd,  $J = 7.7, 5.1, 1.3$  Hz, 1H), 7.64 (s, 2H), 7.15 (dd,  $J = 7.8, 2.5$  Hz, 1H), 6.98 (ddd,  $J = 12.1, 9.3, 2.4$  Hz, 1H), 3.87 (s, 6H). <sup>13</sup>C NMR (151 MHz, DMSO-*d*<sub>6</sub>)  $\delta$  159.33, 156.77, 154.11, 152.07, 145.17, 142.27, 141.34, 139.63, 132.01, 131.40, 128.61, 124.39, 123.36, 123.25, 122.09, 121.41, 121.28, 120.66, 101.53, 93.33, 84.20, 35.89. <sup>19</sup>F NMR (CD<sub>3</sub>CN, 376 MHz)  $\delta$  -72.92, -107.52, -110.06; <sup>31</sup>P NMR (202 MHz, CD<sub>3</sub>CN)  $\delta$  -144.50; IR (KBr) 2104 cm<sup>-1</sup> (C=C=C); HR-MS (ESI):  $m/z = 493.04538$ ,  $[\text{C}_{23}\text{H}_{17}\text{F}_2\text{N}_4\text{Pd}]^+$ , calc. for  $[\text{C}_{23}\text{H}_{17}\text{F}_2\text{N}_4\text{Pd}]^+$   $m/z = 493.0456$ ; HR-MS (ESI):  $m/z = 144.96380$ ,  $[\text{PF}_6]^-$ , calc. for  $[\text{PF}_6]^-$   $m/z = 144.9647$ . Anal. Calcd for  $\text{C}_{23}\text{H}_{17}\text{F}_2\text{N}_4\text{PdPF}_6$ : C, 43.30; H, 2.68; N, 8.78; Found: C, 41.84; H, 2.51; N, 8.26.

**Pd-2-LA** Orange solid (yield: 53%)

<sup>1</sup>H NMR (400 MHz, DMSO-*d*<sub>6</sub> + minor CD<sub>2</sub>Cl<sub>2</sub>)  $\delta$  8.76 (d,  $J = 4.5$  Hz, 1H), 8.57 (d,  $J = 7.9$  Hz, 1H), 8.37 – 8.29 (m, 2H), 8.24 (t,  $J = 8.1$  Hz, 1H), 7.99 (d,  $J = 8.1$  Hz, 1H), 7.83 – 7.77 (m, 1H), 7.62 (s, 2H), 7.37 (d,  $J = 8.7$  Hz, 1H), 7.29 (d,  $J = 7.8$  Hz, 1H), 6.98 – 6.92 (m, 1H), 6.60 (d,  $J = 8.8$  Hz, 1H), 3.97 (dd,  $J = 12.3, 5.6$  Hz, 9H), 3.86 (t,  $J = 6.4$  Hz, 3H), 1.68 (dd,  $J = 14.6, 6.5$  Hz, 6H), 1.25 (s, 48H), 0.86 (t,  $J = 6.7$  Hz, 9H); <sup>19</sup>F NMR (376 MHz, DMSO-*d*<sub>6</sub> + minor CD<sub>2</sub>Cl<sub>2</sub>) -105.91, -108.86; <sup>31</sup>P NMR (202 MHz, DMSO-*d*<sub>6</sub> + minor CD<sub>2</sub>Cl<sub>2</sub>) no signal; HR-MS (ESI):  $m/z = 493.04538$ ,  $[\text{C}_{23}\text{H}_{17}\text{N}_4\text{F}_2\text{Pd}]^+$ , calc. for  $[\text{C}_{23}\text{H}_{17}\text{F}_2\text{N}_4\text{Pd}]^+$   $m/z = 493.0456$ ; HR-MS (ESI):  $m/z = 709.54435$ ,  $[\text{C}_{42}\text{H}_{77}\text{O}_6\text{S}]^-$ , calc. for  $[\text{C}_{42}\text{H}_{77}\text{O}_6\text{S}]^-$   $m/z = 709.5446$ .

**Pt-2-PF<sub>6</sub>** Dark green solid (yield: 11%)

<sup>1</sup>H NMR (500 MHz, CD<sub>3</sub>CN)  $\delta$  8.75 (d,  $J = 5.1$  Hz, 1H), 8.19 (q,  $J = 8.0$  Hz, 2H), 8.03 – 7.91 (m, 2H), 7.84 (d,  $J = 7.9$  Hz, 1H), 7.68 (t,  $J = 5.5$  Hz, 1H), 7.34 (s, 2H), 7.02 (d,  $J = 8.4$  Hz, 1H), 6.74 – 6.63 (m, 1H), 3.84 (s, 6H); <sup>19</sup>F NMR (CD<sub>3</sub>CN, 376 MHz)  $\delta$  -72.47, -106.86, -110.46; <sup>31</sup>P NMR (202 MHz, CD<sub>3</sub>CN)  $\delta$  -144.58. HR-MS (ESI):  $m/z = 582.10614$ ,  $[\text{C}_{23}\text{H}_{17}\text{F}_2\text{N}_4\text{Pt}]^+$ , calc. for  $[\text{C}_{23}\text{H}_{17}\text{F}_2\text{N}_4\text{Pt}]^+$   $m/z = 582.1069$ ; HR-MS (ESI):  $m/z =$

144.96373,  $[\text{PF}_6]^-$ , calc. for  $[\text{PF}_6]^-$   $m/z = 144.9647$ . Anal. Calcd for  $\text{C}_{23}\text{H}_{17}\text{F}_2\text{N}_4\text{PtPF}_6$ : C, 37.99; H, 2.35; N, 7.70; Found: C, 38.50; H, 2.51; N, 6.26.

**Pt-2-LA** Green solid (yield: 54%)

$^1\text{H}$  NMR (400 MHz,  $\text{DMSO-}d_6$  + minor  $\text{CD}_2\text{Cl}_2$ )  $\delta$  8.95 (d,  $J = 5.2$  Hz, 1H), 8.51 (t,  $J = 7.7$  Hz, 1H), 8.38 – 8.30 (m, 1H), 8.25 (t,  $J = 8.1$  Hz, 1H), 8.15 (dd,  $J = 14.7, 7.8$  Hz, 1H), 8.00 (d,  $J = 8.1$  Hz, 1H), 7.87 – 7.77 (m, 1H), 7.54 (d,  $J = 7.7$  Hz, 2H), 7.43 (d,  $J = 8.6$  Hz, 1H), 7.24 (d,  $J = 8.6$  Hz, 1H), 6.80 – 6.70 (m, 1H), 6.61 – 6.51 (m, 1H), 4.22 – 3.58 (m, 12H), 1.75 (s, 6H), 1.26 (s, 48H), 0.86 (q,  $J = 3.4$  Hz, 9H);  $^{19}\text{F}$  NMR (376 MHz,  $\text{DMSO-}d_6$  + minor  $\text{CD}_2\text{Cl}_2$ )  $-105.60, -109.54$ ;  $^{31}\text{P}$  NMR (202 MHz,  $\text{DMSO}$ ) no signal; HR-MS (ESI):  $m/z = 582.10614$ ,  $[\text{C}_{23}\text{H}_{17}\text{N}_4\text{F}_2\text{Pt}]^+$ , calc. for  $[\text{C}_{23}\text{H}_{17}\text{N}_4\text{Pt}]^+$   $m/z = 582.1069$ ; HR-MS (ESI):  $m/z = 709.54475$ ,  $[\text{C}_{42}\text{H}_{77}\text{O}_6\text{S}]^-$ , calc. for  $[\text{C}_{42}\text{H}_{77}\text{O}_6\text{S}]^-$   $m/z = 709.5446$ .

**Pd-3-PF<sub>6</sub>** Orange solid (yield: 45%)

$^1\text{H}$  NMR (600 MHz,  $\text{DMSO-}d_6$ )  $\delta$  8.70 (d,  $J = 5.0$  Hz, 1H), 8.50 (d,  $J = 8.0$  Hz, 1H), 8.27 (t,  $J = 7.9$  Hz, 1H), 8.11 (dt,  $J = 15.6, 7.8$  Hz, 2H), 7.90 (d,  $J = 7.8$  Hz, 1H), 7.75 (t,  $J = 6.5$  Hz, 1H), 7.66 (d,  $J = 8.7$  Hz, 1H), 7.62 (s, 2H), 7.17 (s, 1H), 6.68 (dd,  $J = 8.6, 2.3$  Hz, 1H), 3.88 (s, 6H), 3.77 (s, 3H).  $^{13}\text{C}$  NMR (151 MHz,  $\text{DMSO-}d_6$ )  $\delta$  162.25, 159.67, 155.92, 155.61, 152.74, 151.13, 147.11, 140.73, 140.62, 140.33, 130.84, 127.53, 126.24, 123.66, 123.21, 121.15, 118.97, 118.33, 109.94, 83.65, 54.73, 35.07.  $^{19}\text{F}$  NMR (376 MHz,  $\text{CD}_3\text{CN}$ )  $\delta -72.90$ ;  $^{31}\text{P}$  NMR (202 MHz,  $\text{CD}_3\text{CN}$ )  $\delta -144.63$ . IR (KBr)  $2098\text{ cm}^{-1}$  (C=C=C); HR-MS (ESI):  $m/z = 487.07468$ ,  $[\text{C}_{24}\text{H}_{21}\text{N}_4\text{OPd}]^+$ , calc. for  $[\text{C}_{24}\text{H}_{21}\text{N}_4\text{OPd}]^+$   $m/z = 487.0750$ ; HR-MS (ESI):  $m/z = 144.96374$ ,  $[\text{PF}_6]^-$ , calc. for  $[\text{PF}_6]^-$   $m/z = 144.9647$ . Anal. Calcd for  $\text{C}_{24}\text{H}_{21}\text{N}_4\text{OPdPF}_6$ : C, 45.61; H, 3.34; N, 8.86; Found: C, 44.76; H, 3.19; N, 8.66.

**Pd-3-LA** Red solid (yield: 51%). Red solid turned orange when fumed with methanol vapor.

$^1\text{H}$  NMR (500 MHz,  $\text{DMSO-}d_6$ )  $\delta$  8.75 (d,  $J = 5.3$  Hz, 1H), 8.52 (d,  $J = 8.0$  Hz, 1H), 8.31 (d,  $J = 7.8$  Hz, 1H), 8.14 (d,  $J = 9.0$  Hz, 2H), 7.94 (d,  $J = 7.4$  Hz, 1H), 7.79 (t,  $J = 6.5$  Hz, 1H), 7.70 (d,  $J = 8.6$  Hz, 1H), 7.61 (s, 2H), 7.33 (d,  $J = 8.7$  Hz, 1H), 7.23 (d,  $J = 2.5$  Hz, 1H), 6.72 (d,  $J = 8.9$  Hz, 1H), 6.64 (d,  $J = 8.8$  Hz, 1H), 3.95 – 3.93 (m, 4H), 3.89 (s, 6H), 3.83 (m, 2H), 3.78 (s, 3H), 1.68 (dt,  $J = 14.8, 7.4$  Hz, 6H), 1.24 (m, 48H), 0.85 (t,  $J = 6.6$  Hz, 9H).  $^{19}\text{F}$  NMR (376 MHz,  $\text{DMSO-}d_6$ ) no signal;  $^{31}\text{P}$  NMR (202 MHz,  $\text{DMSO-}d_6$ ) no signal; HR-MS



(ESI):  $m/z = 487.07462$ ,  $[\text{C}_{24}\text{H}_{21}\text{N}_4\text{OPd}]^+$ , calc. for  $[\text{C}_{24}\text{H}_{21}\text{N}_4\text{OPd}]^+$   $m/z = 487.0750$ ; HR-MS (ESI):  $m/z = 709.54456$ ,  $[\text{C}_{42}\text{H}_{77}\text{O}_6\text{S}]^-$ , calc. for  $[\text{C}_{42}\text{H}_{77}\text{O}_6\text{S}]^-$   $m/z = 709.5446$ .

**Pt-3-PF<sub>6</sub>** Green solid (yield: 32%)

<sup>1</sup>H NMR (500 MHz, DMSO-*d*<sub>6</sub>)  $\delta$  8.79 (dd,  $J = 5.1, 1.5$  Hz, 1H), 8.45 (d,  $J = 8.0$  Hz, 1H), 8.27 (td,  $J = 7.8, 1.6$  Hz, 1H), 8.08 (d,  $J = 7.8$  Hz, 1H), 7.97 (t,  $J = 8.0$  Hz, 1H), 7.83 (d,  $J = 8.0$  Hz, 1H), 7.74 (ddd,  $J = 7.7, 5.3, 1.3$  Hz, 1H), 7.62 (s, 2H), 7.55 (d,  $J = 8.6$  Hz, 1H), 6.99 (d,  $J = 2.6$  Hz, 1H), 6.61 (dd,  $J = 8.5, 2.6$  Hz, 1H), 3.85 (s, 6H), 3.75 (s, 3H). <sup>13</sup>C NMR (126 MHz, DMSO-*d*<sub>6</sub>)  $\delta$  164.31, 161.38, 157.93, 154.68, 151.50, 143.45, 141.24, 140.90, 139.91, 137.00, 132.21, 129.07, 127.44, 124.64, 122.25, 121.84, 119.29, 118.72, 110.04, 83.73, 55.34, 35.80. <sup>19</sup>F NMR (376 MHz, CD<sub>3</sub>CN)  $\delta$  -72.95; <sup>31</sup>P NMR (202 MHz, CD<sub>3</sub>CN)  $\delta$  -144.64; HR-MS (ESI):  $m/z = 576.13562$ ,  $[\text{C}_{24}\text{H}_{21}\text{N}_4\text{OPt}]^+$ , calc. for  $[\text{C}_{24}\text{H}_{21}\text{N}_4\text{OPt}]^+$   $m/z = 576.1363$ ; HR-MS (ESI):  $m/z = 144.96371$ ,  $[\text{PF}_6]^-$ , calc. for  $[\text{PF}_6]^-$   $m/z = 144.9647$ . Anal. Calcd for C<sub>24</sub>H<sub>21</sub>N<sub>4</sub>OPtPF<sub>6</sub>: C, 39.97; H, 2.93; N, 7.77; Found: C, 39.46; H, 2.59; N, 7.60.

**Pt-3-LA** Red or green solid (yield: 30%). Green solid turned red when fumed with methanol vapor.

<sup>1</sup>H NMR (400 MHz, CD<sub>2</sub>Cl<sub>2</sub>)  $\delta$  8.96 (s, 1H), 8.23 – 8.17 (m, 1H), 8.12 (d,  $J = 7.5$  Hz, 1H), 7.91 (t,  $J = 7.8$  Hz, 1H), 7.74 (dd,  $J = 13.1, 7.4$  Hz, 2H), 7.56 (dd,  $J = 13.1, 8.3$  Hz, 2H), 7.44 (d,  $J = 8.5$  Hz, 1H), 7.38 (s, 2H), 7.19 (d,  $J = 2.6$  Hz, 1H), 6.68 (d,  $J = 8.5$  Hz, 1H), 6.60 (d,  $J = 8.6$  Hz, 1H), 4.25 – 4.02 (m, 4H), 3.98 (s, 8H), 3.84 (s, 3H), 1.83 (d,  $J = 7.7$  Hz, 6H), 1.30 (d,  $J = 9.3$  Hz, 48H), 0.99 – 0.83 (m, 9H); <sup>19</sup>F NMR (376 MHz, DMSO) no signal; <sup>31</sup>P NMR (202 MHz, DMSO) no signal; HR-MS (ESI):  $m/z = 576.13550$ ,  $[\text{C}_{24}\text{H}_{21}\text{N}_4\text{OPt}]^+$ , calc. for  $[\text{C}_{24}\text{H}_{21}\text{N}_4\text{OPt}]^+$   $m/z = 576.1363$ ; HR-MS (ESI):  $m/z = 709.54448$ ,  $[\text{C}_{42}\text{H}_{77}\text{O}_6\text{S}]^-$ , calc. for  $[\text{C}_{42}\text{H}_{77}\text{O}_6\text{S}]^-$   $m/z = 709.5446$ .

**Table S1.** Crystal Data for **Pd-1-PF<sub>6</sub>** (yellow block),<sup>7</sup> **Pt-1-PF<sub>6</sub>** and **Pd-3-LA·CH<sub>2</sub>Cl<sub>2</sub>**.

|                                            | <b>Pd-1-PF<sub>6</sub>-yellow</b>                                  | <b>Pt-1-PF<sub>6</sub></b>                                         | <b>Pd-3-LA·CH<sub>2</sub>Cl<sub>2</sub></b>                                         |
|--------------------------------------------|--------------------------------------------------------------------|--------------------------------------------------------------------|-------------------------------------------------------------------------------------|
| formula                                    | C <sub>23</sub> H <sub>19</sub> F <sub>6</sub> N <sub>4</sub> P Pd | C <sub>23</sub> H <sub>19</sub> F <sub>6</sub> N <sub>4</sub> P Pt | C <sub>67</sub> H <sub>100</sub> Cl <sub>2</sub> N <sub>4</sub> O <sub>7</sub> Pd S |
| fw                                         | 602.79                                                             | 691.48                                                             | 1282.86                                                                             |
| color                                      | yellow                                                             | orange                                                             | orange                                                                              |
| crystal size (mm)                          | 0.40 × 0.32 × 0.28                                                 | 0.42 × 0.32 × 0.28                                                 | 0.36 × 0.32 × 0.08                                                                  |
| crystal system                             | <i>P</i> -1                                                        | <i>P</i> -1                                                        | <i>P</i> 1 2 <sub>1</sub> 1                                                         |
| space group                                | triclinic                                                          | triclinic                                                          | monoclinic                                                                          |
| <i>a</i> , Å                               | 8.2664(11)                                                         | 8.2935(4)                                                          | 8.3719(2)                                                                           |
| <i>b</i> , Å                               | 11.9680(15)                                                        | 11.9546(6)                                                         | 58.8373(16)                                                                         |
| <i>c</i> , Å                               | 12.4012(16)                                                        | 12.3936(6)                                                         | 13.8630(4)                                                                          |
| <i>α</i> , deg                             | 73.332(4)                                                          | 73.231(2)                                                          | 90                                                                                  |
| <i>β</i> , deg                             | 73.511(4)                                                          | 73.486(2)                                                          | 90.4740(10)                                                                         |
| <i>γ</i> , deg                             | 74.085(4)                                                          | 73.658(2)                                                          | 90                                                                                  |
| <i>V</i> , Å <sup>3</sup>                  | 1101.9(2)                                                          | 1101.06(10)                                                        | 6828.4(3)                                                                           |
| <i>Z</i>                                   | 2                                                                  | 2                                                                  | 4                                                                                   |
| <i>D<sub>c</sub></i> , g cm <sup>-3</sup>  | 1.817                                                              | 2.086                                                              | 1.248                                                                               |
| <i>μ</i> , mm <sup>-1</sup>                | 0.986                                                              | 6.516                                                              | 3.606                                                                               |
| <i>F</i> (000)                             | 600                                                                | 664                                                                | 2728                                                                                |
| 2 $\theta$ <sub>max</sub> , deg            | 27.533                                                             | 45.107                                                             | 68.357                                                                              |
| <i>no.</i> reflections                     | 11570                                                              | 113825                                                             | 82855                                                                               |
| <i>no.</i> independent reflections         | 5010 [R <sub>int</sub> = 0.0596]                                   | 18171 [R <sub>int</sub> = 0.0408]                                  | 24494 [R <sub>int</sub> = 0.0494]                                                   |
| <i>no.</i> variables                       | 319                                                                | 319                                                                | 1491                                                                                |
| <i>GOF</i> on <i>F</i> <sup>2</sup>        | 1.035                                                              | 1.103                                                              | 1.065                                                                               |
| <i>R</i> <sub>1</sub> <sup><i>a</i></sup>  | 0.0314                                                             | 0.0345                                                             | 0.0460                                                                              |
| <i>wR</i> <sub>2</sub> <sup><i>b</i></sup> | 0.0799                                                             | 0.0793                                                             | 0.1140                                                                              |
| residual $\rho$ , eÅ <sup>-3</sup>         | +0.693, -0.525                                                     | +6.049, -4.584                                                     | +0.855, -1.298                                                                      |

<sup>*a*</sup>  $R = \sum ||F_o| - |F_c|| / \sum |F_o|$ . <sup>*b*</sup>  $Rw = \{ \sum [w(F_o^2 - F_c^2)^2] / \sum [w(F_o^2)^2] \}^{1/2}$ .

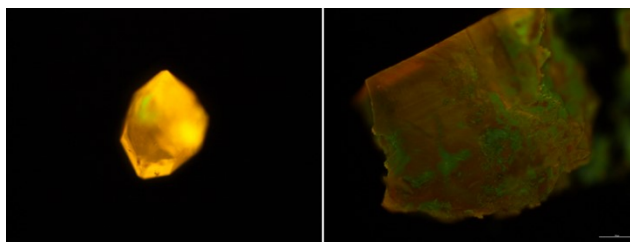

**Figure S1** Micrographs of crystals of **Pt-1-PF<sub>6</sub>** (left) and **Pd-3-LA·CH<sub>2</sub>Cl<sub>2</sub>** (right) under a fluorescence microscope (excitation @ 365 nm).

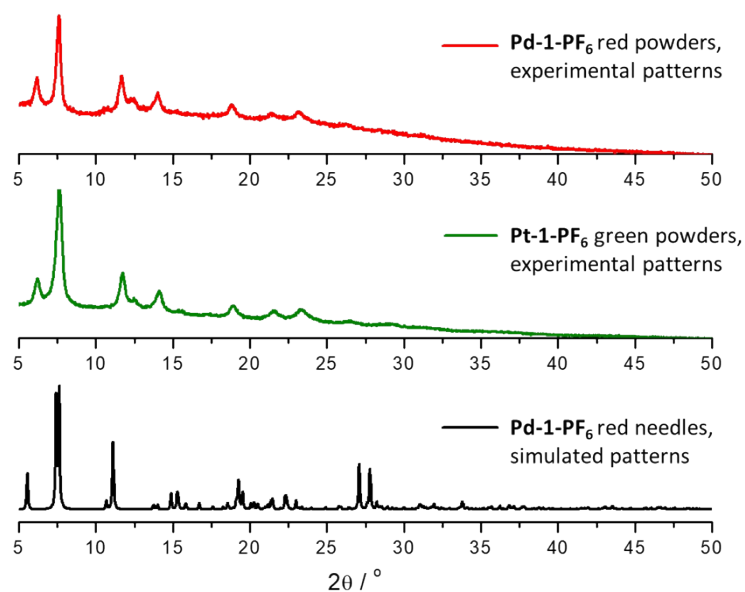

**Figure S2.** Experimental and simulated powder X-ray diffraction patterns for bulky red **Pd-1-PF<sub>6</sub>** red powders (red line), **Pt-1-PF<sub>6</sub>** green powders (green line) and red needle-like **Pd-1-PF<sub>6</sub>** single crystals (black line) respectively.

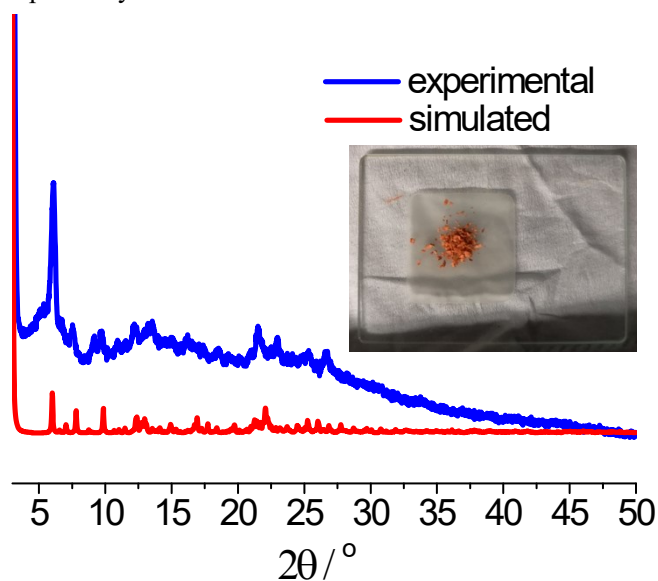

**Figure S3.** Experimental (blue line) and simulated (red line) powder X-ray diffraction patterns for bulky orange **Pd-3-LA** powder and **Pd-3-LA·CH<sub>2</sub>Cl<sub>2</sub>** single X-ray crystal structure respectively. Inset: image of bulky orange **Pd-3-LA** powder for the PXRD test.

**Table S2.** Photophysical Data.

| Complex                                 | Medium (T / K), ( $10^{-5}$ M)                                | $\lambda_{\text{abs}} / \text{nm}$<br>( $\epsilon / \times 10^3 \text{ mol}^{-1} \text{ dm}^3 \text{ cm}^{-1}$ ) | $\lambda_{\text{em}} / \text{nm}$ ( $\tau / \mu\text{s}$ ) | $\Phi_{\text{em}}$ |
|-----------------------------------------|---------------------------------------------------------------|------------------------------------------------------------------------------------------------------------------|------------------------------------------------------------|--------------------|
| <b>Pd-1-PF<sub>6</sub></b> <sup>7</sup> | CH <sub>3</sub> CN (298)                                      | 264 (35.9), 280 (39.8), 319 (18.8),<br>333 (15.2)                                                                | Non-emissive                                               | -- <sup>a</sup>    |
|                                         | butyronitrile (77)<br>( $1.6 \times 10^{-4}$ M)               | -- <sup>a</sup>                                                                                                  | 570 (13.0)                                                 | >0.99              |
|                                         | Solid (298)                                                   | -- <sup>a</sup>                                                                                                  | 695 (1.20)                                                 | 0.43               |
| <b>Pd-1-LA</b> <sup>7</sup>             | CH <sub>2</sub> Cl <sub>2</sub> (298)                         | 269 (33.3), 281 (35.4), 320 (16.4),<br>337 (12.6)                                                                | Non-emissive                                               | -- <sup>a</sup>    |
|                                         | Toluene (298)                                                 | 291 (14.1), 332 (8.9), 346 (9.7), 528<br>(3.7)                                                                   | 610 (0.26)                                                 | 0.14               |
|                                         | Solid (298)                                                   | -- <sup>a</sup>                                                                                                  | Yellow: 550 (0.48),<br>Red: 630 (0.45)                     | 0.14,<br>0.46      |
| <b>Pd-2-PF<sub>6</sub></b>              | CH <sub>3</sub> CN (298)                                      | 255 (33.7), 278 (39.5), 309 (16.1),<br>396 (1.0)                                                                 | Non-emissive                                               | -- <sup>a</sup>    |
|                                         | butyronitrile (77)                                            | -- <sup>a</sup>                                                                                                  | 602 (12.4)                                                 | -- <sup>a</sup>    |
|                                         | Solid (298)                                                   | -- <sup>a</sup>                                                                                                  | Orange: 605 (0.42)                                         | 0.38               |
| <b>Pd-2-LA</b>                          | CH <sub>2</sub> Cl <sub>2</sub> (298)                         | 261 (45.0), 271 (45.2), 279 (48.9),<br>314 (17.0), 329 (12.8), 403 (2.0)                                         | Non-emissive                                               | -- <sup>a</sup>    |
|                                         | Toluene (298)                                                 | 299 (20.4), 329 (7.0), 374 (3.4), 513<br>(2.1)                                                                   | 660 (0.58)                                                 | 0.45               |
|                                         | Solid (298)                                                   | -- <sup>a</sup>                                                                                                  | Orange: 586 (0.32)                                         | 0.17               |
| <b>Pd-3-PF<sub>6</sub></b>              | CH <sub>3</sub> CN (298)                                      | 263 (41.0), 286 (41.7), 315 (21.6),<br>407 (2.0)                                                                 | Non-emissive                                               | -- <sup>a</sup>    |
|                                         | butyronitrile (77)                                            | -- <sup>a</sup>                                                                                                  | 502 (162.0), 532<br>(165.0), 607 (33.2)                    | -- <sup>a</sup>    |
|                                         | Solid (298)                                                   | -- <sup>a</sup>                                                                                                  | Orange: 625 (1.71)                                         | 0.21               |
| <b>Pd-3-LA</b>                          | CH <sub>2</sub> Cl <sub>2</sub> (298) ( $5 \times 10^{-5}$ M) | 266 (21.4), 287 (21.7), 318 (11.0),<br>410 (1.1)                                                                 | Non-emissive                                               | -- <sup>a</sup>    |
|                                         | Toluene (298) ( $5 \times 10^{-5}$ M)                         | 296 (8.4), 346 (5.7), 520 (2.1)                                                                                  | 600, 680 (0.26)                                            | 0.04               |
|                                         | Solid (298)                                                   | -- <sup>a</sup>                                                                                                  | Orange: 588 (5.0),<br>Red: 625 (0.37)                      | 0.13,<br>0.12      |
| <b>Pt-1-PF<sub>6</sub></b>              | CH <sub>3</sub> CN (298)                                      | 278 (37.4), 332 (15.8), 353 (12.4),<br>403 (5.9)                                                                 | 563 (0.30) <sup>b</sup>                                    | 0.04 <sup>b</sup>  |
|                                         | butyronitrile (77)                                            | -- <sup>a</sup>                                                                                                  | 515 (5.8), 553, 600                                        | -- <sup>a</sup>    |
|                                         | Solid (298)                                                   | -- <sup>a</sup>                                                                                                  | Green: 830 <sup>c</sup>                                    | < 0.01             |
| <b>Pt-1-LA</b>                          | CH <sub>2</sub> Cl <sub>2</sub> (298)                         | 278 (37.2), 325 (15.4), 359 (12.4),<br>413 (5.0)                                                                 | 550 (0.56) <sup>b</sup> , 580                              | 0.06 <sup>b</sup>  |
|                                         | Toluene (298)                                                 | 287 (20.8), 368 (6.7), 432 (3.2), 750<br>(2.2)                                                                   | 875 <sup>c</sup>                                           | < 0.01             |

|                            |                                                                   |                                                                                       |                                                 |                                   |
|----------------------------|-------------------------------------------------------------------|---------------------------------------------------------------------------------------|-------------------------------------------------|-----------------------------------|
|                            | Solid (298)                                                       | -- <sup>a</sup>                                                                       | Green: 958 <sup>c</sup>                         | < 0.01                            |
| <b>Pt-2-PF<sub>6</sub></b> | CH <sub>3</sub> CN (298)                                          | 273 (28.2), 281 (28.6), 319 (11.4),<br>336 (9.2), 352 (7.2), 401 (4.3)                | 521 (0.02) <sup>b</sup> , 545                   | 0.01 <sup>b</sup>                 |
|                            | butyronitrile (77)                                                | -- <sup>a</sup>                                                                       | 496 (6.1), 532 (6.2),<br>573 (6.4), 679 (2.5)   | -- <sup>a</sup>                   |
|                            | Solid (298)                                                       | -- <sup>a</sup>                                                                       | 850 <sup>c</sup>                                | < 0.01                            |
| <b>Pt-2-LA</b>             | CH <sub>2</sub> Cl <sub>2</sub> (298)                             | 274 (34.2), 283 (33.6), 321 (13.2),<br>339 (10.9), 356 (8.6), 390 (4.6), 406<br>(4.5) | 521 (2.0) <sup>b</sup> , 552 (2.0) <sup>b</sup> | 0.2 <sup>b</sup>                  |
|                            | Toluene (298)                                                     | 315 (5.8), 329 (5.4), 345 (4.7), 397<br>(3.0), 725 (2.7)                              | 860 (0.03)                                      | 0.02                              |
|                            | Solid (298)                                                       | -- <sup>a</sup>                                                                       | 870 <sup>c</sup>                                | < 0.01                            |
| <b>Pt-3-PF<sub>6</sub></b> | CH <sub>3</sub> CN (298)                                          | 287 (40.86), 347 (15.1), 406 (5.3)                                                    | 600 (0.80) <sup>b</sup>                         | 0.04 <sup>b</sup>                 |
|                            | butyronitrile (77)                                                | -- <sup>a</sup>                                                                       | 545 (7.3), 580, 675                             | -- <sup>a</sup>                   |
|                            | Solid (298)                                                       | -- <sup>a</sup>                                                                       | 840 <sup>c</sup>                                | < 0.01                            |
| <b>Pt-3-LA</b>             | CH <sub>2</sub> Cl <sub>2</sub> (298) (5 × 10 <sup>-5</sup><br>M) | 291 (54.3), 354 (20.9), 411 (5.8)                                                     | 620 (0.29) <sup>b</sup>                         | 0.02 <sup>b</sup>                 |
|                            | Toluene (298) (5 × 10 <sup>-5</sup><br>M)                         | 303 (10.8), 369 (5.5), 720 (3.0)                                                      | 875 <sup>c</sup>                                | < 0.01                            |
|                            | Solid (298)                                                       | -- <sup>a</sup>                                                                       | Red: 715 (0.52),<br>Green: 895 <sup>c</sup>     | Red:<br>0.07,<br>Green:<br>< 0.01 |

<sup>a</sup> No detection. <sup>b</sup> The data were collected in solutions degassed by N<sub>2</sub> bubbling. <sup>c</sup> Lifetimes were not obtained due to the weak emission intensity.

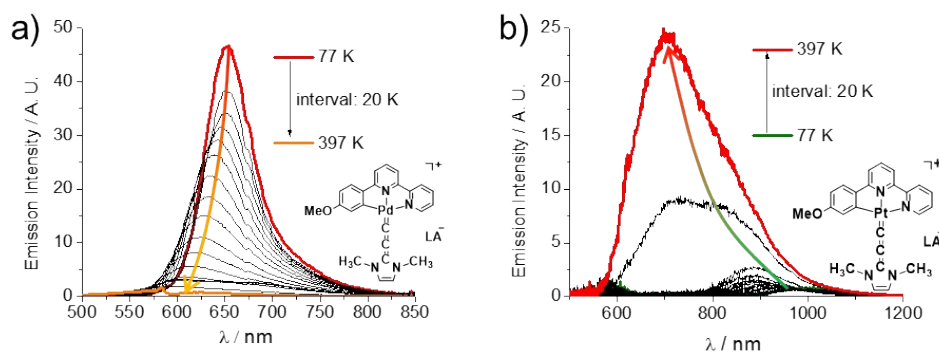

**Figure S4.** Solid-state emission spectra of a) **Pd-3-LA** (red solid,  $\lambda_{\text{ex}} = 470$  nm) and b) **Pt-3-LA** (green solid,  $\lambda_{\text{ex}} = 470$  nm) at variable temperatures.

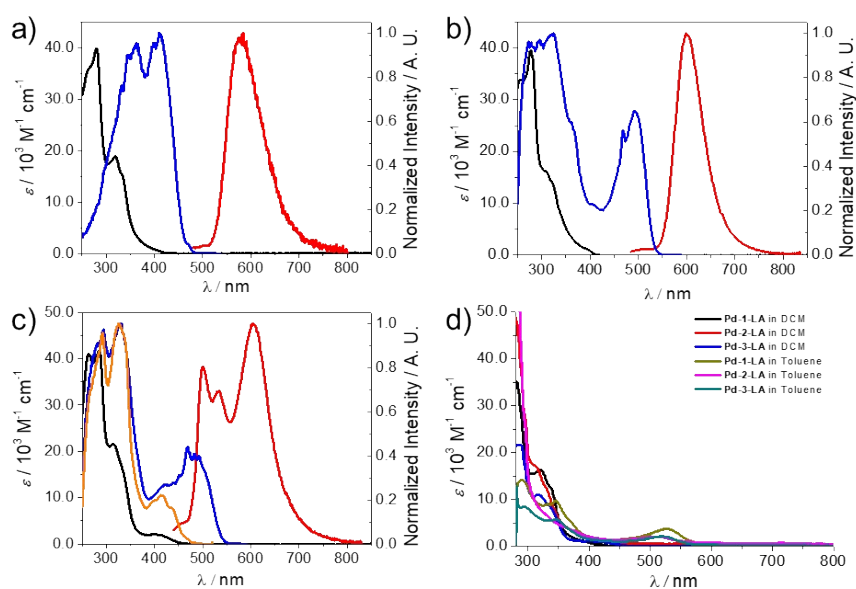

**Figure S5** a-c) Electronic absorption (black line) of **Pd-(1-3)-PF<sub>6</sub>** in room temperature  $\text{CH}_3\text{CN}$ , normalized excitation (blue and orange line) and emission (red line) spectra of **Pd-(1-3)-PF<sub>6</sub>** in  $\text{CH}_3\text{CH}_2\text{CH}_2\text{CN}$  at 77 K. d) Electronic absorption spectra of **Pd-(1-3)-LA** at room temperature in  $\text{CH}_2\text{Cl}_2$  and toluene respectively.

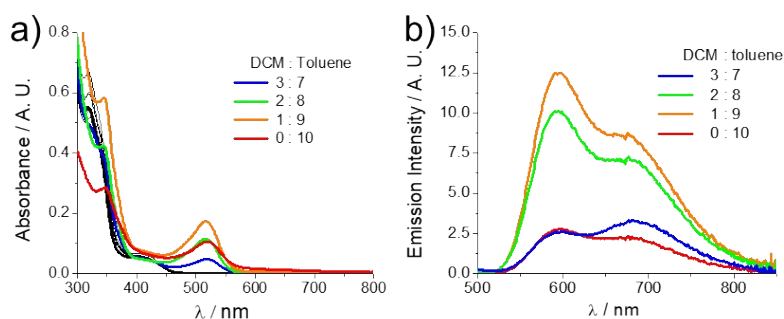

**Figure S6.** a) Absorption and b) emission ( $\lambda_{\text{ex}} = 400$  nm) spectra **Pd-3-LA** in  $\text{CH}_2\text{Cl}_2$ /toluene solutions with a variety volumetric ratios (10/0 ~ 0/10) at 298 K (concentration  $\sim 5.0 \times 10^{-5}$  M).

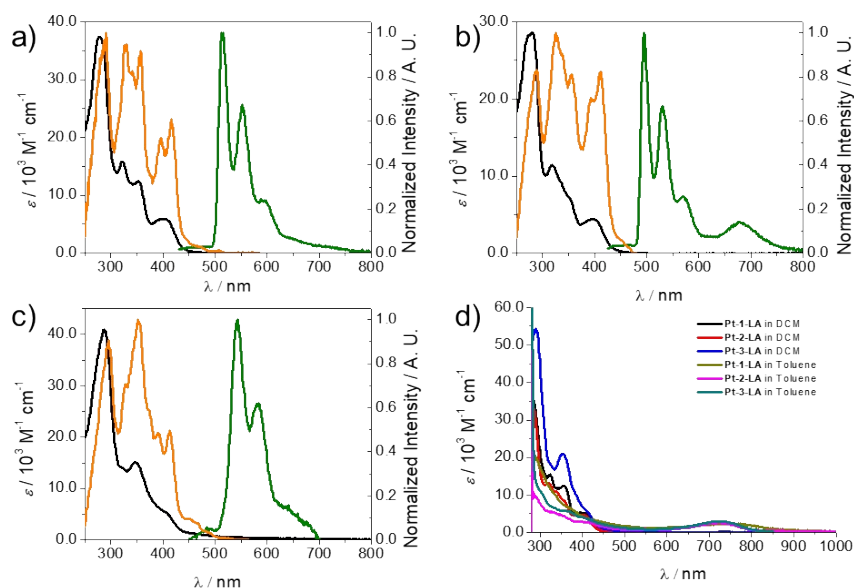

**Figure S7** a-c) Electronic absorption (black line) of Pt-(1-3)-PF<sub>6</sub> in room temperature CH<sub>3</sub>CN, normalized excitation (orange line) and emission (green line) spectra of Pt-(1-3)-PF<sub>6</sub> (1.0 × 10<sup>-5</sup> M) in CH<sub>3</sub>CH<sub>2</sub>CH<sub>2</sub>CN at 77 K. d) Electronic absorption spectra of Pt-(1-3)-LA at room temperature in CH<sub>2</sub>Cl<sub>2</sub> and toluene respectively.

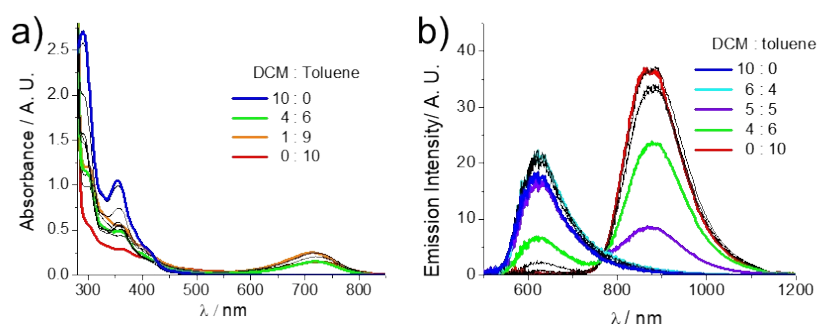

**Figure S8.** a) Absorption and b) emission ( $\lambda_{\text{ex}} = 425$  nm) spectra Pt-3-LA in CH<sub>2</sub>Cl<sub>2</sub>/toluene solutions with a variety volumetric ratios (10/0 ~ 0/10) at 298 K (concentration ~5.0 × 10<sup>-5</sup> M).

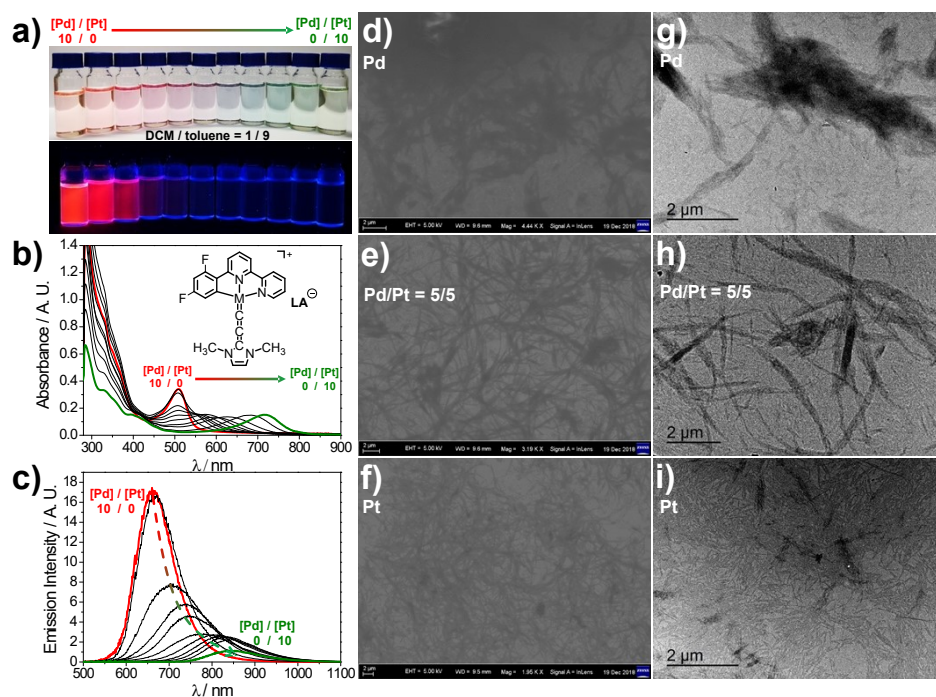

**Figure S9.** a) Photo-images of the gradual color and emission changes of **M(Pd/Pt)-2-LA** ( $5.0 \times 10^{-5}$  M) in CH<sub>2</sub>Cl<sub>2</sub>/toluene (1/9) solutions (up: ambient light, down: 365 nm UV light) and corresponding b) UV-vis absorption and c) emission spectra. d-f) SEM and g-i) TEM images of **M(Pd/Pt)-2-LA** ( $5.0 \times 10^{-5}$  M) in CH<sub>2</sub>Cl<sub>2</sub>/toluene (1/9) solutions.

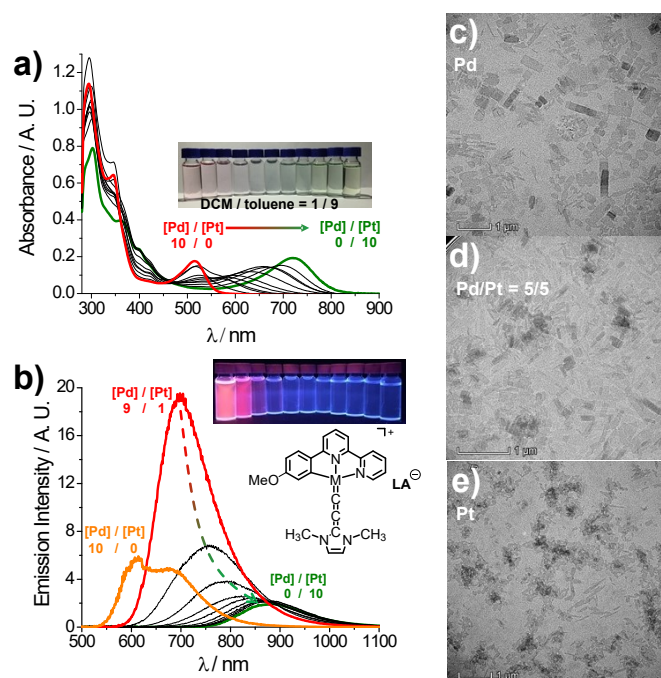

**Figure S10.** a) UV-vis absorption and b) emission spectra of **M(Pd/Pt)-3-LA** ( $5.0 \times 10^{-5}$  M) in CH<sub>2</sub>Cl<sub>2</sub>/toluene (1/9) solutions (inset: corresponding photo-images of the gradual color and emission changes with the various Pd/Pt metal fractions, under ambient and 365 nm UV light respectively). c-e) TEM images of **M(Pd/Pt)-3-LA** ( $5.0 \times 10^{-5}$  M) in CH<sub>2</sub>Cl<sub>2</sub>/toluene (1/9) solutions.



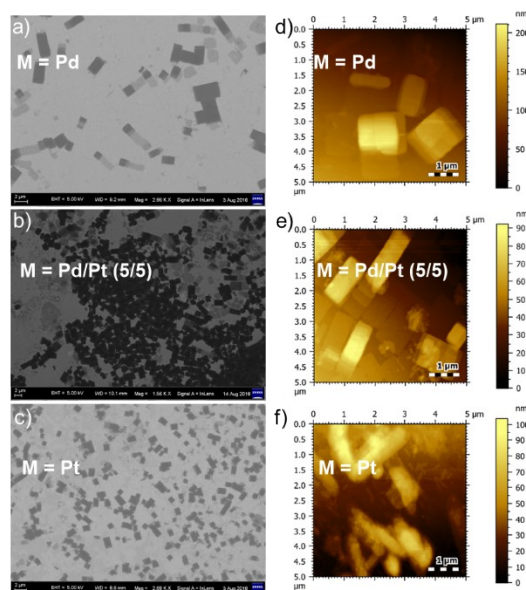

**Figure S11.** a-c) SEM and d-f) AFM images of **M(Pd/Pt)-1-LA** ( $5.0 \times 10^{-5}$  M) in  $\text{CH}_2\text{Cl}_2$ /toluene (1/9) solutions.

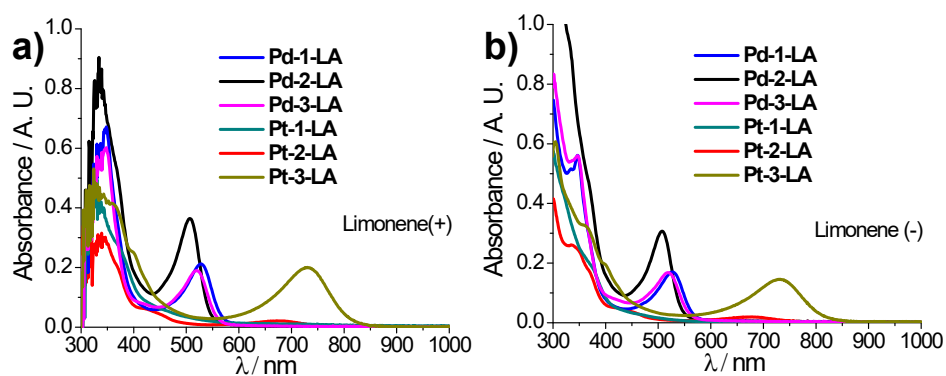

**Figure S12.** UV-vis absorption spectra after 2 h stirring in  $\text{CH}_2\text{Cl}_2$ /limonene (1/9) solutions ( $5 \times 10^{-5}$  M) for **Pd-1-LA** (blue line), **Pd-2-LA** (black line), **Pd-3-LA** (purple line), **Pt-1-LA** (green line), **Pt-2-LA** (red line) and **Pt-3-LA** (dark yellow line), respectively. Chiral solvent used: a) limonene (+), b) limonene (-).

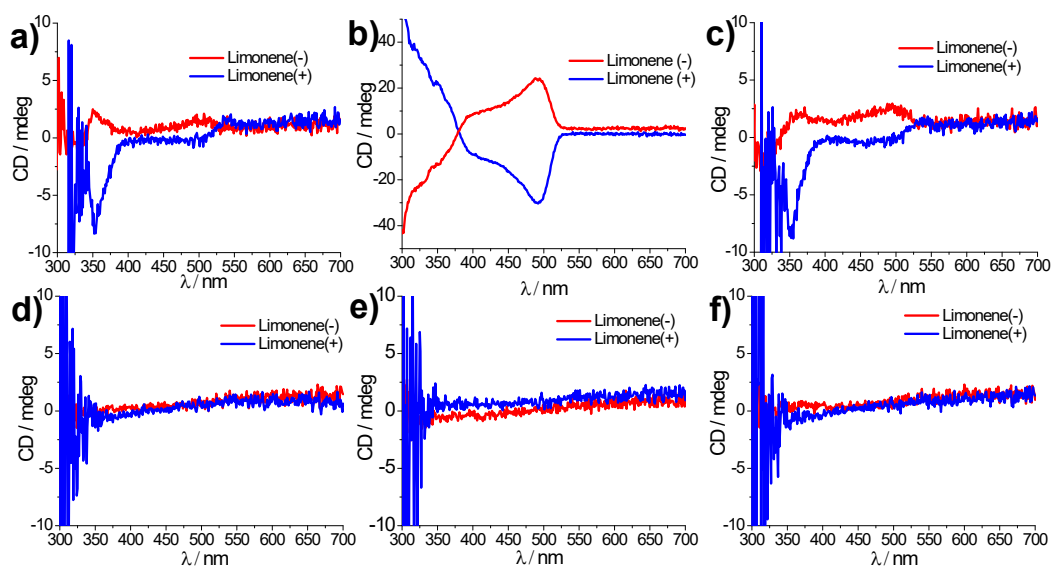

**Figure S13.** CD spectra after 2 h stirring in  $\text{CH}_2\text{Cl}_2$ /limonene (1/9) solutions (limonene (+): blue line, limonene (-): red line) for a) **Pd-1-LA** ( $5.0 \times 10^{-5}$  M), b) **Pd-2-LA** ( $2.5 \times 10^{-5}$  M), c) **Pd-3-LA** ( $5.0 \times 10^{-5}$  M), d) **Pt-1-LA** ( $5.0 \times 10^{-5}$  M), e) **Pt-2-LA** ( $5.0 \times 10^{-5}$  M) and **Pt-3-LA** ( $5.0 \times 10^{-5}$  M), respectively.

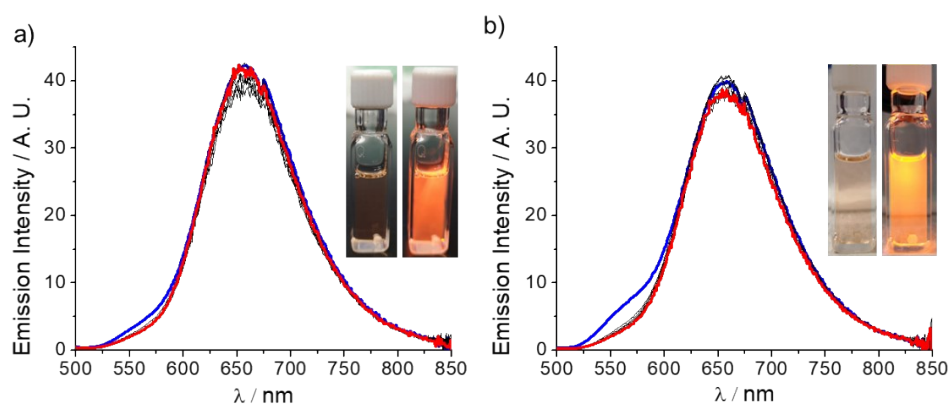

**Figure S14.** Time-dependent emission spectra (inset: sample images under ambient light (left) and 365 nm UV light (right) respectively) of **Pd-2-LA** ( $2.5 \times 10^{-5}$  M) in  $\text{CH}_2\text{Cl}_2$ /limonene (1/9) solution: a) limonene (+), b) limonene (-).

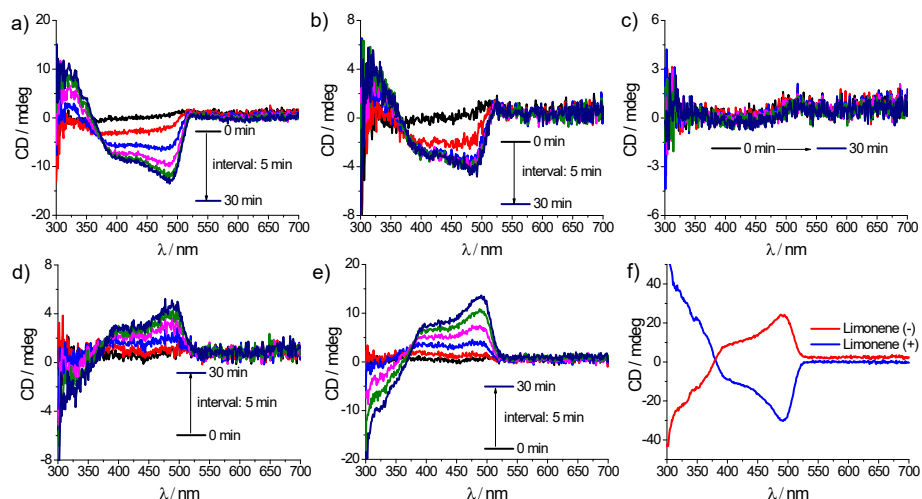

**Figure S15.** Time-dependent CD spectra of **Pd-2-LA** ( $2.5 \times 10^{-5}$  M) in  $\text{CH}_2\text{Cl}_2$ /limonene (1/9) solutions with various optical rotations: a) limonene (+), b) limonene (+) / limonene (-) = 2/1, c) limonene (racemic), d) limonene (+) / limonene (-) = 1/2, e) limonene (-). f) Terminal state of the CD spectra after 2 h stirring in  $\text{CH}_2\text{Cl}_2$ /limonene (1/9) solutions (limonene (+): blue, limonene (-): red).

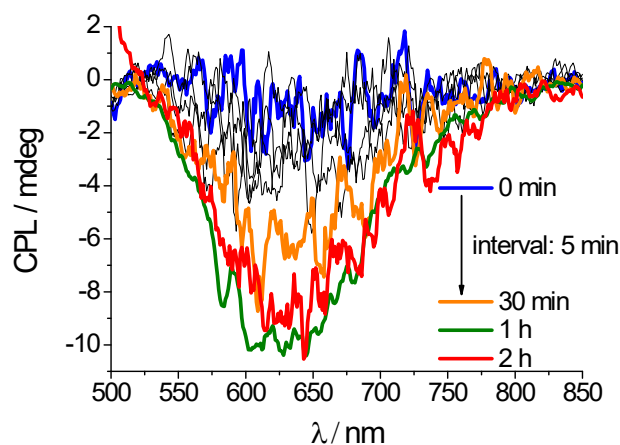

**Figure S16.** Time-dependent CPL spectra of **Pd-2-LA** ( $2.5 \times 10^{-5}$  M) in  $\text{CH}_2\text{Cl}_2$ /limonene (+, 1/9) solution.

The vortex effect on the chiral signals have also been considered. The stirring speed and CW (clockwise)-CCW (counter clockwise) operation of the stirring bars have no influence on the dilute solutions, but did have great impacts on the CD and CPL values for the samples containing **Pd-2-LA** higher than  $5.0 \times 10^{-5}$  M in homochiral  $\text{CH}_2\text{Cl}_2$ /limonene (1/9) solutions. The time-dependent and semi-reversible  $g_{\text{CD}}$  and  $g_{\text{lum}}$  values changes, before and after stirring (CW/CCW), with or without stirring (CW/CCW), remained unexplained and should be a future issue.

**Table S3.** Characteristic survey of the allenylidene properties.

|                            | $^{13}\text{C}$ -NMR chemical shift ( $C_\beta$ ) / ppm | $\nu(\text{C}=\text{C}=\text{C}) / \text{cm}^{-1}$ | $C_\alpha\text{-}C_\beta / \text{\AA}$ |
|----------------------------|---------------------------------------------------------|----------------------------------------------------|----------------------------------------|
| <b>Pd-1-PF<sub>6</sub></b> | 83.9                                                    | 2104 (red)                                         | 1.214 (yellow), 1.188 (red)            |
| <b>Pt-1-PF<sub>6</sub></b> | 83.9                                                    | -- <sup>a</sup>                                    | 1.225 (orange)                         |
| <b>Pd-2-PF<sub>6</sub></b> | 84.2                                                    | 2104 (orange)                                      | -- <sup>a</sup>                        |
| <b>Pd-3-PF<sub>6</sub></b> | 83.6                                                    | 2098 (red)                                         | 1.221 (orange, -LA)                    |

<sup>a</sup> Not detected.

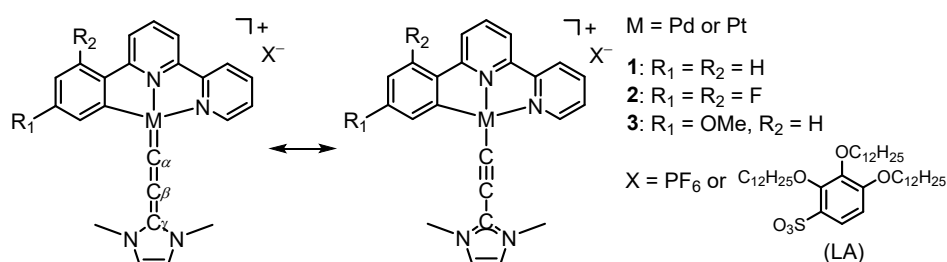**Scheme S5.** Mesomerism between cyclometallated tridentate metal allenylidene and zwitterionic acetylide.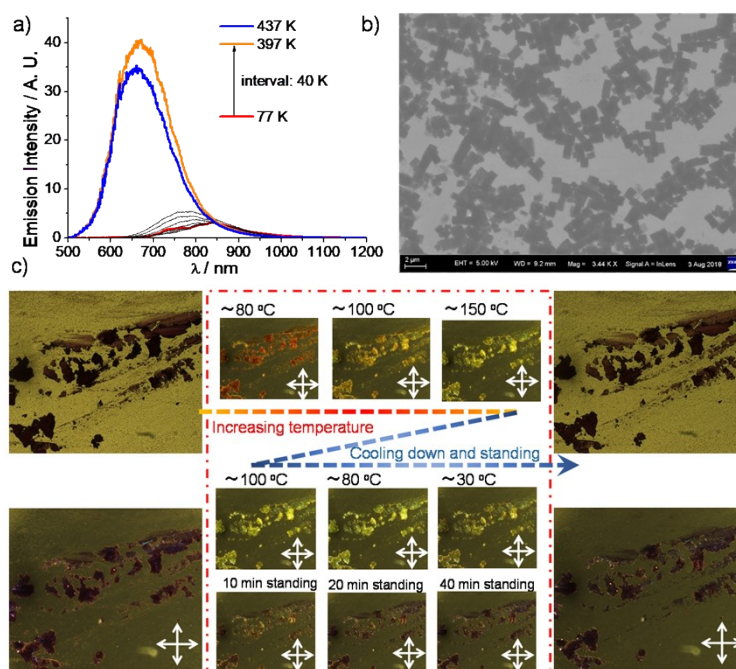**Figure S17.** a) Temperature dependent solid emission spectra, b) SEM image and c) the heating and cooling cycle of **M-1-LA** (M: Pd/Pt = 8/2) obtained from the mixed solution of  $\text{CH}_2\text{Cl}_2$ /Toluene (1/9, total metal concentration =  $3.5 \times 10^{-4}$  M) under POM.

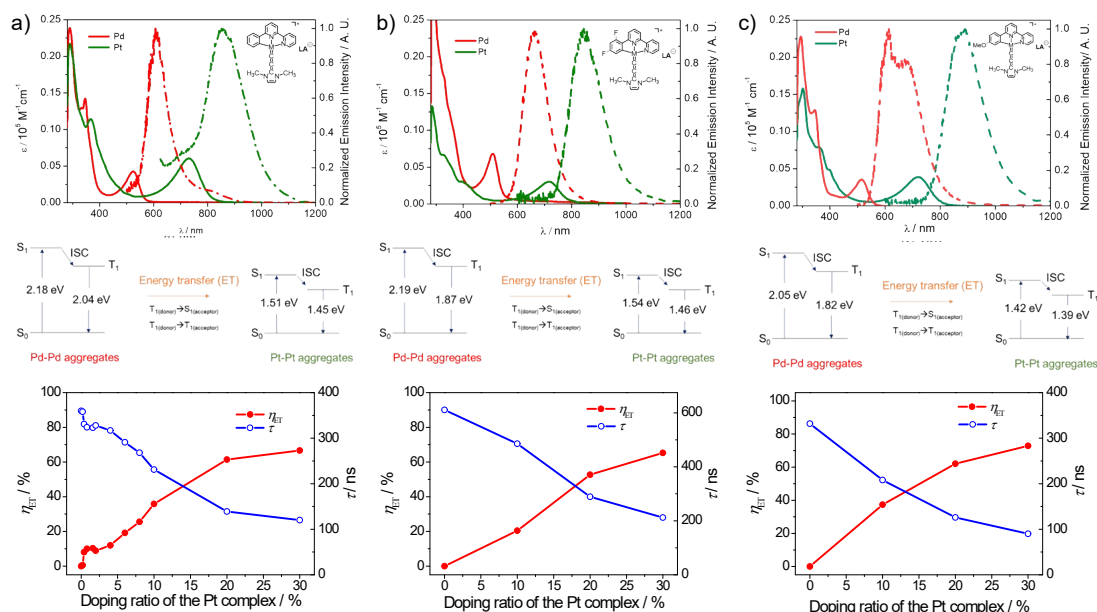

**Figure S18. Top:** UV-vis absorption (solid line) and emission (dashed line) spectra of a) Pd-1-LA (red) and Pt-1-LA (green), b) Pd-2-LA (red) and Pt-2-LA (green), c) Pd-3-LA (red) and Pt-3-LA (green) in solution (CH<sub>2</sub>Cl<sub>2</sub>/Toluene = 1/9, 5.0×10<sup>-5</sup> M). **Middle:** energy diagram of donor and acceptor. ET=energy transfer, ISC=intersystem crossing. **Bottom:** Plots of the energy transfer efficiency ( $\eta_{ET}$ ) and lifetime ( $\tau$ ) at the donor emission wavelength as a function of the doping ratio of the Pt congeners in the mixed aggregates.

**Table S4.** Lifetimes of the mixed component **M(Pd/Pt)-1-LA** (total metal concentration: 5×10<sup>-5</sup> M) recorded @ em 695 nm in solution (CH<sub>2</sub>Cl<sub>2</sub>/Toluene = 1/9) at room temperature, and corresponding parameters calculated for the energy transfer process.

| Pt (%)                                          | 0    | 0.2  | 0.4  | 0.8   | 1.6   | 2    | 4     | 6     | 8     | 10    | 20    | 30    |
|-------------------------------------------------|------|------|------|-------|-------|------|-------|-------|-------|-------|-------|-------|
| $\tau$ (ns)                                     | 360  | 358  | 331  | 324   | 323   | 328  | 317   | 291   | 268   | 231   | 139   | 120   |
| $\eta_{ET}$ (%)                                 | --   | 0.56 | 8.06 | 10.00 | 10.28 | 8.89 | 11.94 | 19.17 | 25.56 | 35.83 | 61.39 | 66.67 |
| $k_{total}$ (×10 <sup>6</sup> s <sup>-1</sup> ) | 2.78 | 2.79 | 3.02 | 3.09  | 3.10  | 3.05 | 3.15  | 3.44  | 3.73  | 4.33  | 7.19  | 8.33  |
| $k_{ET}$ (×10 <sup>6</sup> s <sup>-1</sup> )    | --   | 0.02 | 0.24 | 0.31  | 0.32  | 0.27 | 0.38  | 0.66  | 0.95  | 1.55  | 4.42  | 5.56  |

**Table S5.** Lifetimes of the mixed component **M(Pd/Pt)-2-LA** (total metal concentration: 5×10<sup>-5</sup> M) recorded @ em 662 nm in solution (CH<sub>2</sub>Cl<sub>2</sub>/Toluene = 1/9) at room temperature, and corresponding parameters calculated for the energy transfer process.

| Pt (%)                                          | 0    | 10    | 20    | 30    |
|-------------------------------------------------|------|-------|-------|-------|
| $\tau$ (ns)                                     | 611  | 486   | 289   | 212   |
| $\eta_{ET}$ (%)                                 | --   | 20.46 | 52.70 | 65.30 |
| $k_{total}$ (×10 <sup>6</sup> s <sup>-1</sup> ) | 1.64 | 2.06  | 3.46  | 4.72  |
| $k_{ET}$ (×10 <sup>6</sup> s <sup>-1</sup> )    | --   | 0.42  | 1.82  | 3.08  |

**Table S6.** Lifetimes of the mixed component **M(Pd/Pt)-3-LA** (total metal concentration:  $5 \times 10^{-5}$  M) recorded in solution ( $\text{CH}_2\text{Cl}_2/\text{Toluene} = 1/9$ ) at room temperature, and corresponding parameters calculated for the energy transfer process.

| Pt (%)                                       | 0    | 10    | 20    | 30    |
|----------------------------------------------|------|-------|-------|-------|
| $\tau$ (ns)                                  | 332  | 208   | 126   | 90    |
| $\eta_{ET}$ (%)                              | --   | 37.35 | 62.05 | 72.89 |
| $k_{total}$ ( $\times 10^6 \text{ s}^{-1}$ ) | 3.01 | 4.81  | 7.94  | 11.11 |
| $k_{ET}$ ( $\times 10^6 \text{ s}^{-1}$ )    | --   | 1.80  | 4.92  | 8.10  |

$\tau$ : lifetime;  $\tau_{DA}$ : lifetime recorded with specific doping of the Pt acceptors;  $\tau_D$ : lifetime of Pd donor.

$k_{ET}$ : energy transfer rate.  $k_{ET} = k_{total} - (k_r + k_{nr}) = 1/\tau_{DA} - 1/\tau_D$ .

$\eta_{ET}$ : energy transfer efficiency.  $\eta_{ET} = 1 - \tau_{DA}/\tau_D$ .

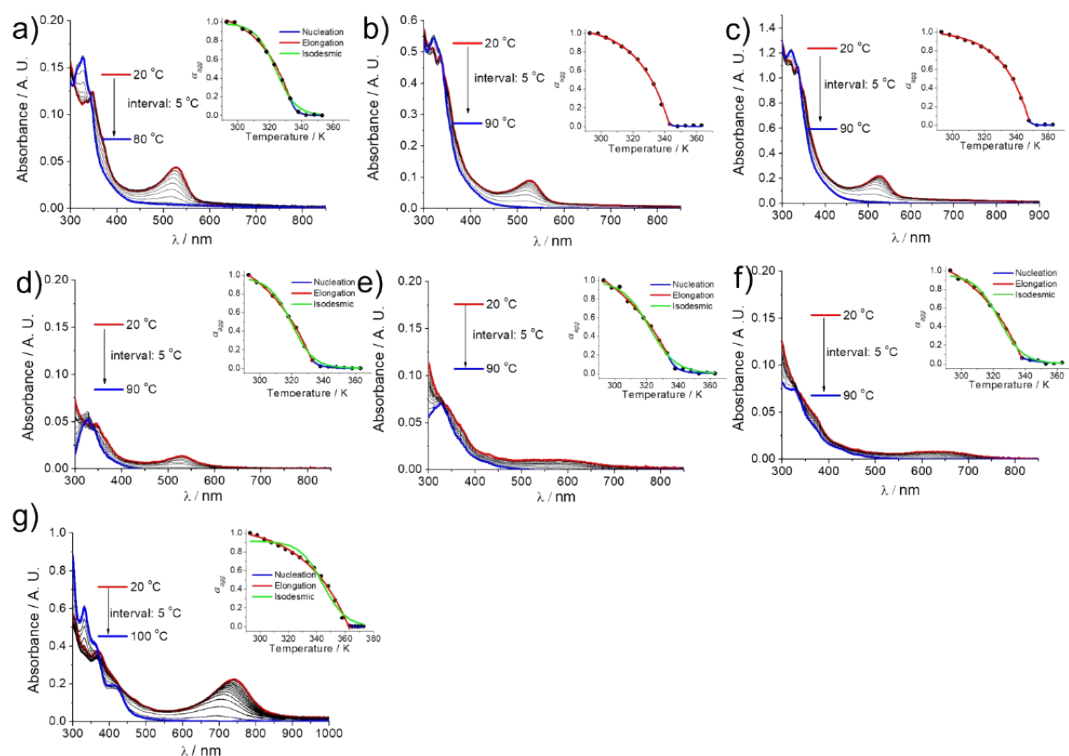

**Figure S19.** Temperature dependent UV-vis absorption of **Pd-1-LA** in toluene solutions with various concentrations: a)  $1.0 \times 10^{-5}$  M, b)  $2.5 \times 10^{-5}$  M, c)  $5.0 \times 10^{-5}$  M. UV-vis absorption of mixed **M(Pd/Pt)-1-LA** aggregates with different Pd/Pt ratio recorded in toluene solutions by increasing the temperatures: d) M = Pd/Pt (8/2) ( $1.0 \times 10^{-5}$  M), e) M = Pd/Pt (5/5) ( $1.0 \times 10^{-5}$  M), f) M = Pd/Pt (2/8) ( $1.0 \times 10^{-5}$  M), g) M = Pt ( $5.0 \times 10^{-5}$  M). (Inset: data plot for the degree of aggregation against temperature, and corresponding fitting results with both cooperative nucleation-elongation (blue-red line) and isodesmic (green line) models respectively).

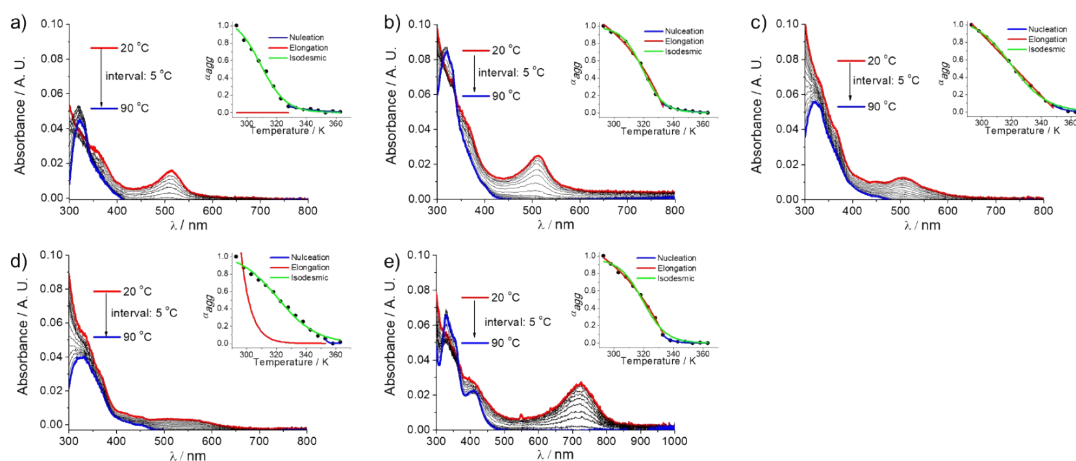

**Figure S20.** UV-vis absorption of **M(Pd/Pt)-2-LA** ( $1.0 \times 10^{-5}$  M) recorded in toluene solutions by increasing the temperatures: a) M = Pd, b) M = Pd/Pt (8/2), c) M = Pd/Pt (5/5), d) M = Pd/Pt (2/8), e) M = Pt. (Inset: data plot for the degree of aggregation against temperature, and corresponding fitting results with both cooperative nucleation-elongation and isodesmic models respectively).

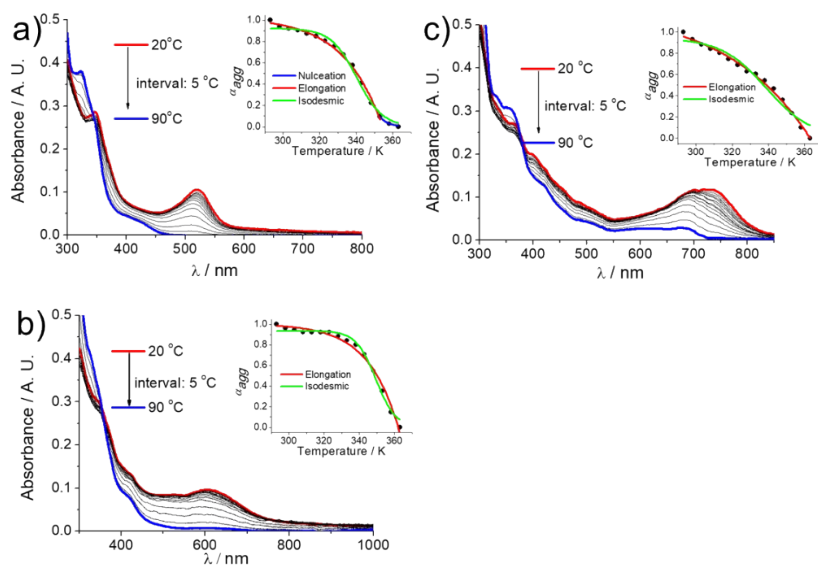

**Figure S21.** UV-vis absorption of **M(Pd/Pt)-3-LA** ( $5.0 \times 10^{-5}$  M) recorded in toluene solutions by increasing the temperatures: a) M = Pd, b) M = Pd/Pt (5/5), c) M = Pt. (Inset: data plot for the degree of aggregation against temperature, and corresponding fitting results with both cooperative nucleation-elongation and isodesmic models respectively).



**Table S7.** Thermodynamic parameters obtained from the temperature-dependent UV-Vis experiments in toluene on the basis of the nucleation-elongation or isodesmic model.

|                            | Conc. / M            | Aggregation mode      | $\alpha_{sat}$ | $\Delta H_e$ ( $\Delta H$ ) <sup>a</sup> / kJ/mol | $T_e$ ( $T_m$ ) <sup>b</sup> / K | $K_a$ / M <sup>-1</sup> | $\langle N_n(T_e) \rangle$ |
|----------------------------|----------------------|-----------------------|----------------|---------------------------------------------------|----------------------------------|-------------------------|----------------------------|
| <b>Pd-1-LA<sup>7</sup></b> | $1.0 \times 10^{-5}$ | Nucleation-elongation | 1.153          | -46.9                                             | 336.2                            | $7.9 \times 10^{-4}$    | 10.8                       |
|                            | $2.5 \times 10^{-5}$ | Nucleation-elongation | 1.081          | -51.8                                             | 343.2                            | $3.2 \times 10^{-4}$    | 14.6                       |
|                            | $5.0 \times 10^{-5}$ | Nucleation-elongation | 1.016          | -59.9                                             | 348.9                            | $2.9 \times 10^{-4}$    | 15.1                       |
| <b>Pd/Pt (8/2)-1-LA</b>    | $1.0 \times 10^{-5}$ | Nucleation-elongation | 1.349          | -30.0                                             | 334.7                            | $9.4 \times 10^{-4}$    | 10.2                       |
| <b>Pd/Pt (5/5)-1-LA</b>    | $1.0 \times 10^{-5}$ | Nucleation-elongation | 1.452          | -24.2                                             | 339.3                            | $3.9 \times 10^{-4}$    | 13.7                       |
| <b>Pd/Pt (2/8)-1-LA</b>    | $1.0 \times 10^{-5}$ | Nucleation-elongation | 1.280          | -30.7                                             | 339.2                            | $4.2 \times 10^{-3}$    | 6.2                        |
| <b>Pt-1-LA</b>             | $5.0 \times 10^{-5}$ | Nucleation-elongation | 1.092          | -36.2                                             | 362.4                            | $3.2 \times 10^{-5}$    | 31.5                       |
| <b>Pd-2-LA</b>             | $1.0 \times 10^{-5}$ | Isodesmic             | --             | -102.1                                            | 309.1                            | --                      | --                         |
| <b>Pd/Pt (8/2)-2-LA</b>    | $1.0 \times 10^{-5}$ | Isodesmic             | --             | -131.2                                            | 319.3                            | --                      | --                         |
| <b>Pd/Pt (5/5)-2-LA</b>    | $1.0 \times 10^{-5}$ | Isodesmic             | --             | -77.7                                             | 319.7                            | --                      | --                         |
| <b>Pd/Pt (2/8)-2-LA</b>    | $1.0 \times 10^{-5}$ | Isodesmic             | --             | -72.5                                             | 321.0                            | --                      | --                         |
| <b>Pt-2-LA</b>             | $1.0 \times 10^{-5}$ | Nucleation-elongation | 1.450          | -24.6                                             | 335.9                            | $4.9 \times 10^{-4}$    | 12.7                       |
| <b>Pd-3-LA</b>             | $5.0 \times 10^{-5}$ | Nucleation-elongation | 1.025          | -50.2                                             | 354.4                            | $2.4 \times 10^{-3}$    | 7.5                        |
| <b>Pd/Pt (5/5)-3-LA</b>    | $5.0 \times 10^{-5}$ | Nucleation-elongation | 1.001          | -63.5                                             | 362.0                            | -- <sup>c</sup>         | -- <sup>c</sup>            |
| <b>Pt-3-LA</b>             | $5.0 \times 10^{-5}$ | Nucleation-elongation | 1.221          | -24.0                                             | 363.0                            | -- <sup>c</sup>         | -- <sup>c</sup>            |

<sup>a</sup>  $\Delta H_e$  for Nucleation-elongation and  $\Delta H$  for isodesmic mode respectively. <sup>b</sup>  $T_e$  for Nucleation-elongation and  $T_m$  for isodesmic mode respectively. <sup>c</sup> Not determined due to the lack of data in the nucleation regime.  $\Delta H_e$ : enthalpy corresponding to the aggregation (elongation) process;  $T_e$ : elongation temperature;  $\alpha_{sat}$ : parameter introduced in the equation to ensure that  $\alpha_{agg}/\alpha_{sat}$  does not exceed unity;  $K_a$ : dimensionless equilibrium constant of the activation step at the elongation temperature;  $\langle N_n \rangle$ : the number-averaged degree of polymerization in the elongation regime, averaged over all active species.  $T_m$ : the melting temperature in the isodesmic regime.

## Supramolecular polymerization mechanism

The isodesmic self-association model assumes that monomers aggregate in an one dimensional, noncyclic manner.<sup>8-9</sup> The reversible formation of noncovalent bonds is identical for all binding, in which the equilibrium constants and Gibbs free energy changes are equal for each step of the aggregation process. The cooperative nucleation-elongation model describes the equilibrium between the monomer pool and supramolecular polymers (oligomer nucleus formation), and the cooperative growth of the latter,<sup>9-12</sup> in which the process can be separated into a nucleation and an elongation phase.

The temperature-dependent isodesmic aggregation model can be described by the function as:

$$\alpha_{agg}(T) \cong \frac{1}{1 + \exp\left(-0.908\Delta H \frac{T - T_m}{RT_m^2}\right)} \quad (1)$$

Whereas,  $\Delta H$  is enthalpy corresponding to the aggregation process and  $T_m$  is the melting temperature.

The temperature-dependent nucleation-elongation aggregation model can be described by the functions in two regimes:

Nucleation regime:

$$\alpha_{agg} = \sqrt[3]{K_a} \exp\left[\left(\frac{2}{3\sqrt[3]{K_a}} - 1\right) \frac{\Delta H_e}{RT_e^2} (T - T_e)\right] \quad (2)$$

Elongation regime:

$$\alpha_{agg} = \alpha_{sat} \left(1 - \exp\left[\frac{-\Delta H_e}{RT_e^2} (T - T_e)\right]\right) \quad (3)$$

$$\langle N_n \rangle = \frac{1}{\sqrt[3]{K_a}} \sqrt{\frac{\alpha_{agg}}{\alpha_{sat} - \alpha_{agg}}} \quad (4)$$

$$\langle N_n(T_e) \rangle = \frac{1}{\sqrt[3]{K_a}} \quad (5)$$

Whereas,  $\Delta H_e$  is enthalpy corresponding to the aggregation (elongation) process;  $T_e$  is elongation temperature;  $\alpha_{sat}$  is parameter introduced in the equation to ensure that  $\alpha_{agg}/\alpha_{sat}$  does not exceed unity;  $K_a$  is dimensionless equilibrium constant of the activation step at the elongation temperature;  $\langle N_n \rangle$  is the number-averaged degree of polymerization in the elongation regime, averaged over all

active

species.

## NMR spectra

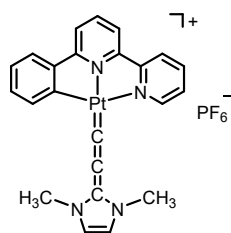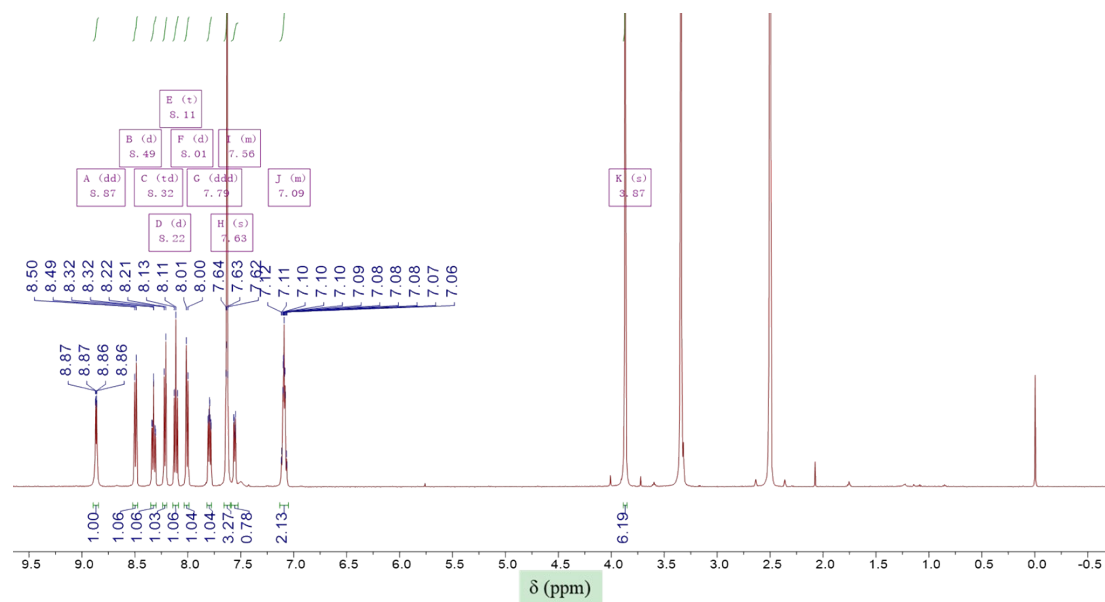

<sup>1</sup>H NMR (500 MHz, DMSO-*d*<sub>6</sub>) spectrum of Pt-1-PF<sub>6</sub>

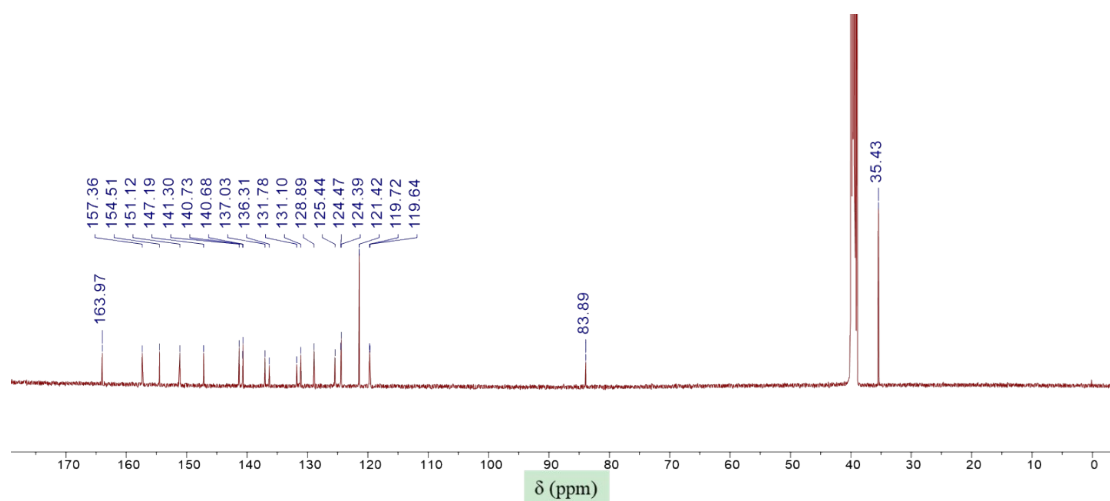

<sup>13</sup>C NMR (126 MHz, DMSO-*d*<sub>6</sub>) spectrum of Pt-1-PF<sub>6</sub>

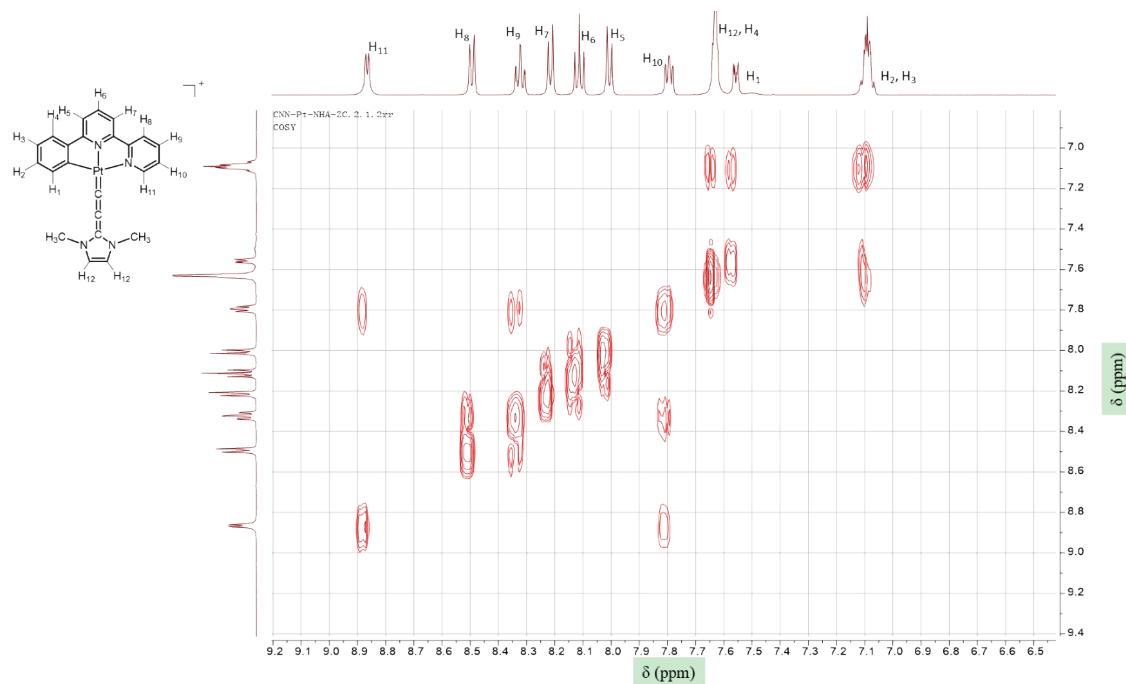

$^1\text{H}$ - $^1\text{H}$  COSY (DMSO- $d_6$ ) spectrum of **Pt-1-PF<sub>6</sub>**

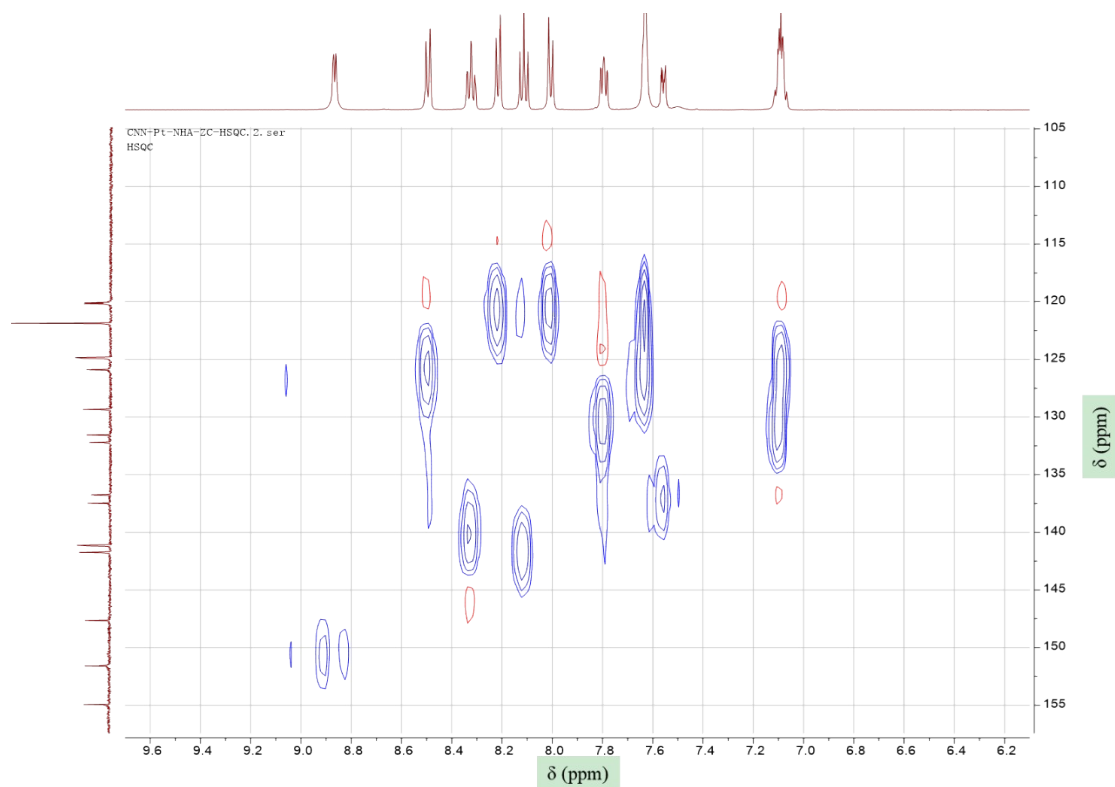

C-H COSY (HSQC, DMSO- $d_6$ ) spectrum of **Pt-1-PF<sub>6</sub>**

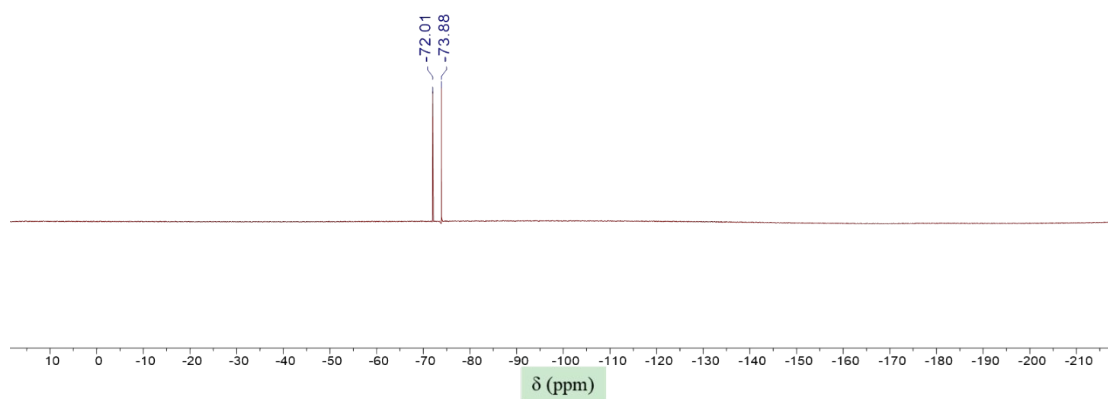

$^{19}\text{F}$  NMR (376 MHz, MeCN- $d_3$ ) spectrum of Pt-1-PF<sub>6</sub>

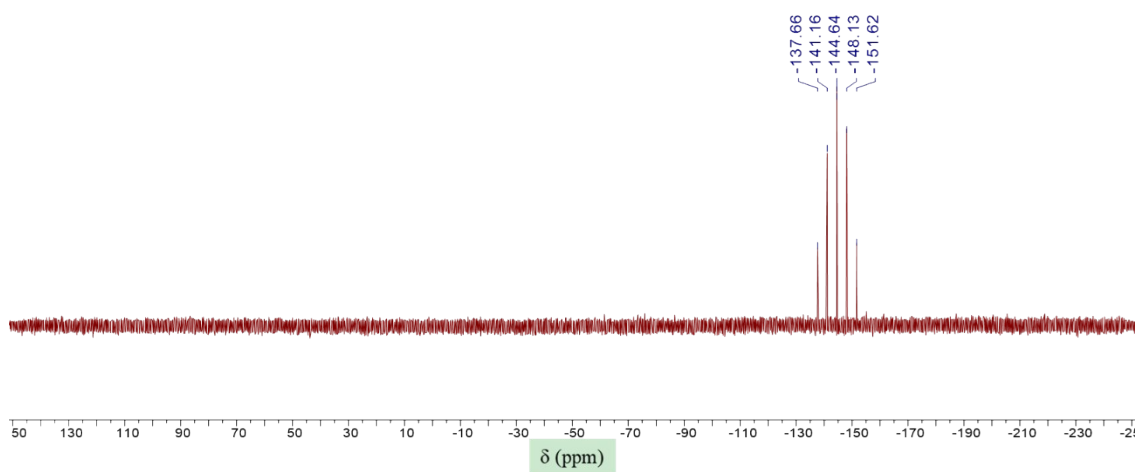

$^{31}\text{P}$  NMR (202 MHz, MeCN- $d_3$ ) spectrum of Pt-1-PF<sub>6</sub>

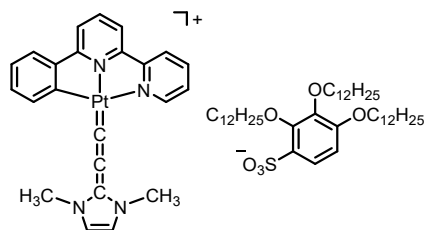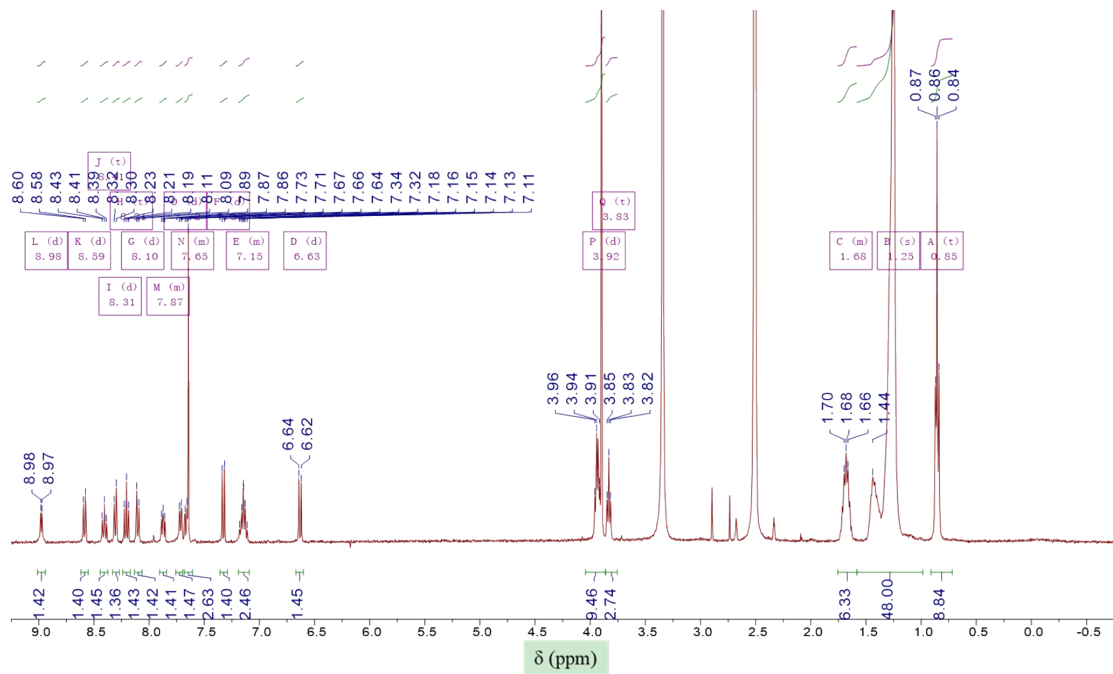

<sup>1</sup>H NMR (400 MHz, DMSO-*d*<sub>6</sub>) spectrum of **Pt-1-LA**

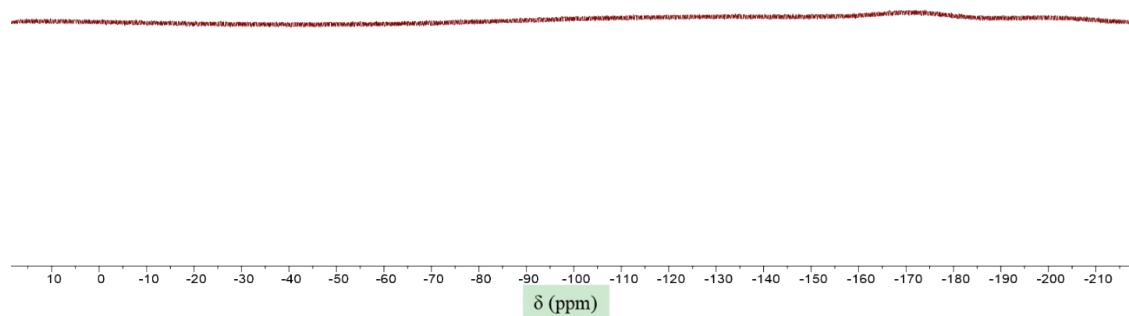

<sup>19</sup>F NMR (376 MHz, DMSO-*d*<sub>6</sub>) spectrum of **Pt-1-LA**

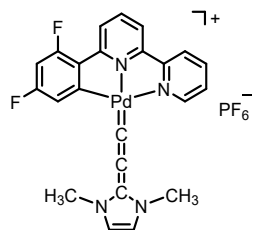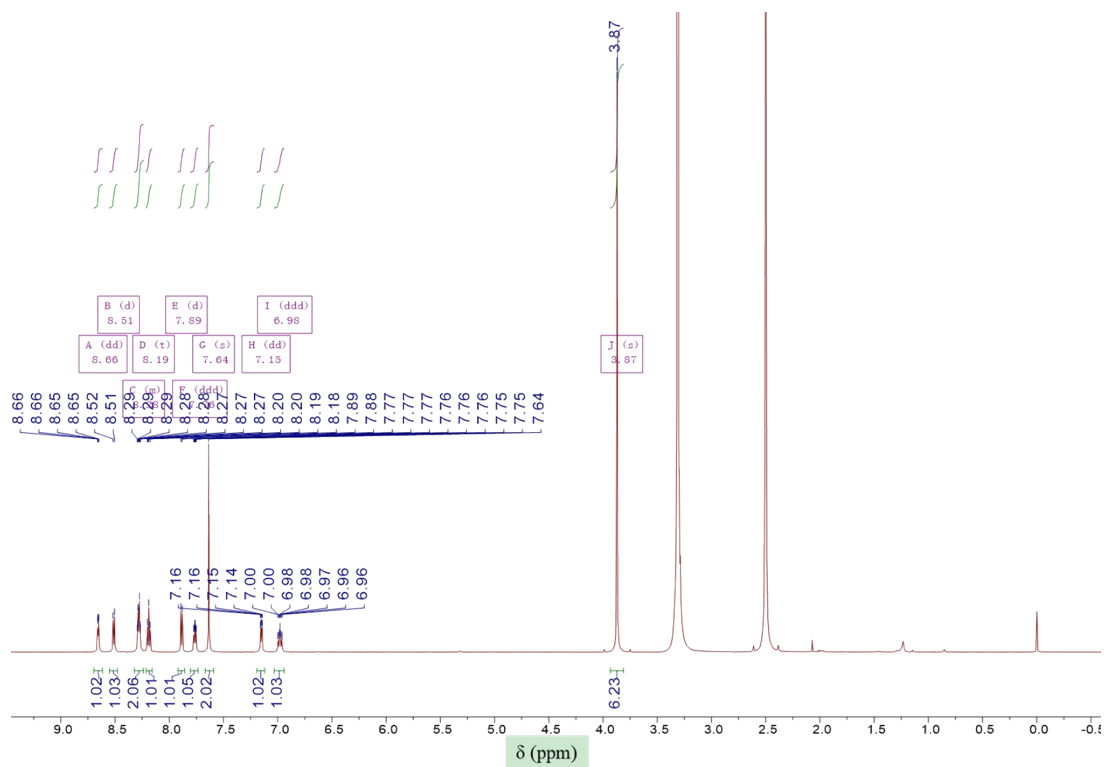

<sup>1</sup>H NMR (600 MHz, DMSO-*d*<sub>6</sub>) spectrum of Pd-2-PF<sub>6</sub>

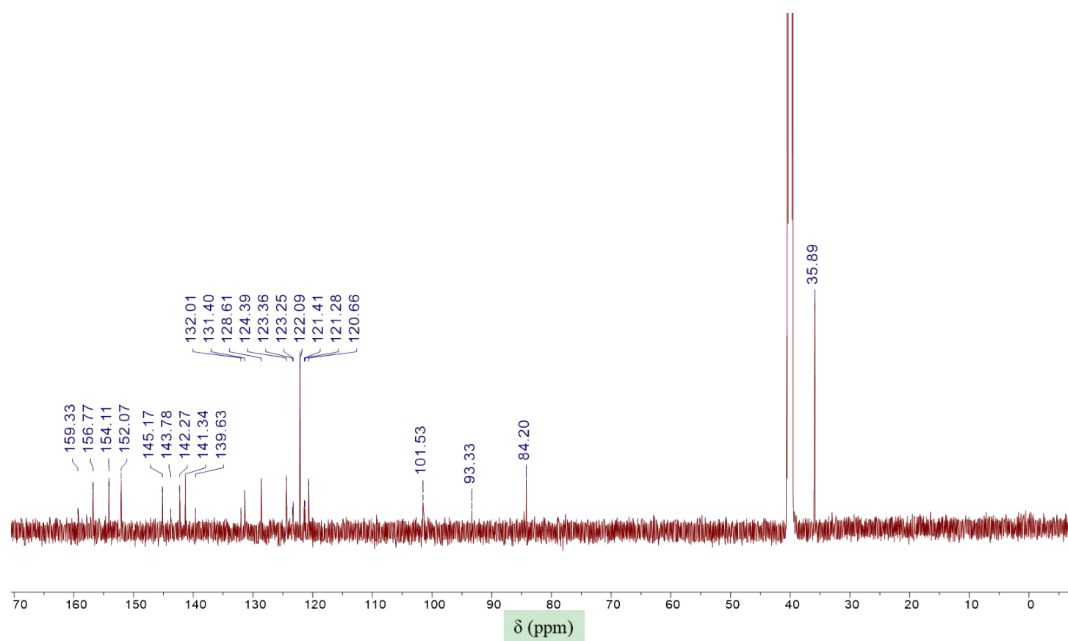

<sup>13</sup>C NMR (151 MHz, DMSO-*d*<sub>6</sub>) spectrum of Pd-2-PF<sub>6</sub>



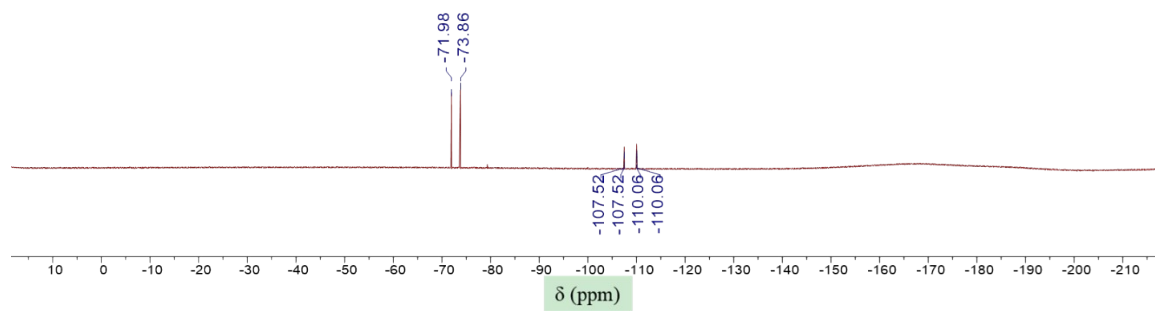

$^{19}\text{F}$  NMR (376 MHz,  $\text{MeCN-}d_3$ ) spectrum of **Pd-2-PF<sub>6</sub>**

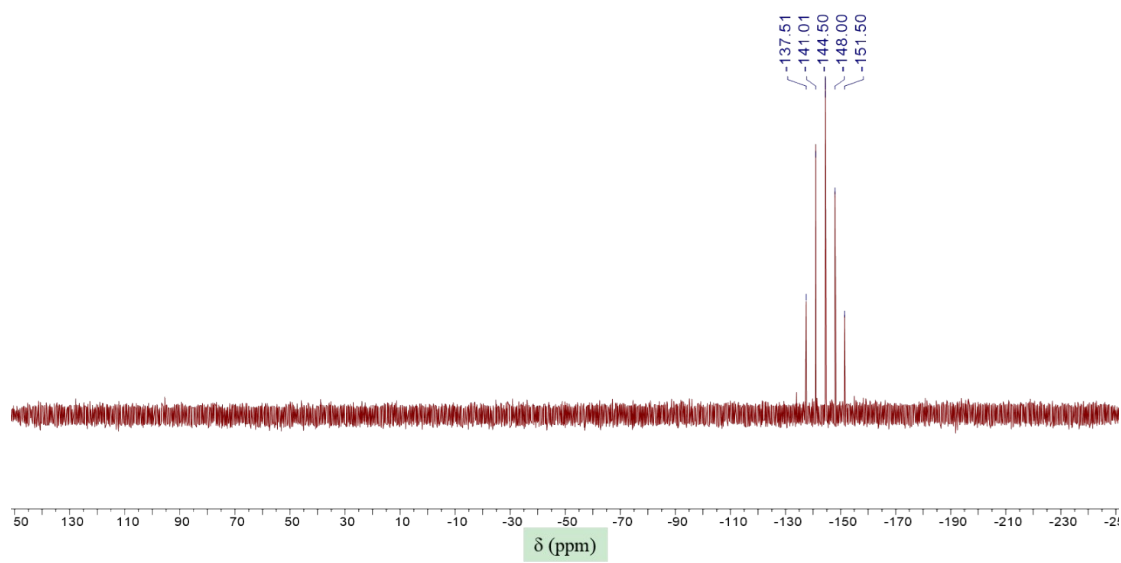

$^{31}\text{P}$  NMR (202 MHz,  $\text{MeCN-}d_3$ ) spectrum of **Pd-2-PF<sub>6</sub>**

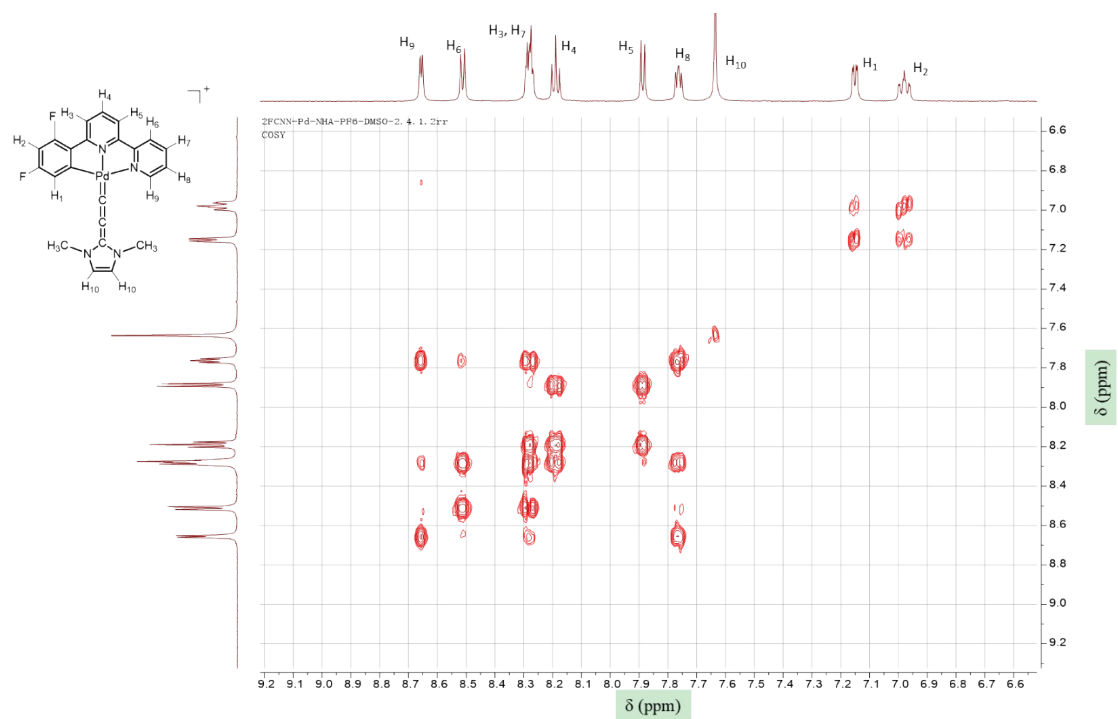

$^1\text{H}$ - $^1\text{H}$  COSY (DMSO- $d_6$ ) spectrum of Pd-2-PF<sub>6</sub>

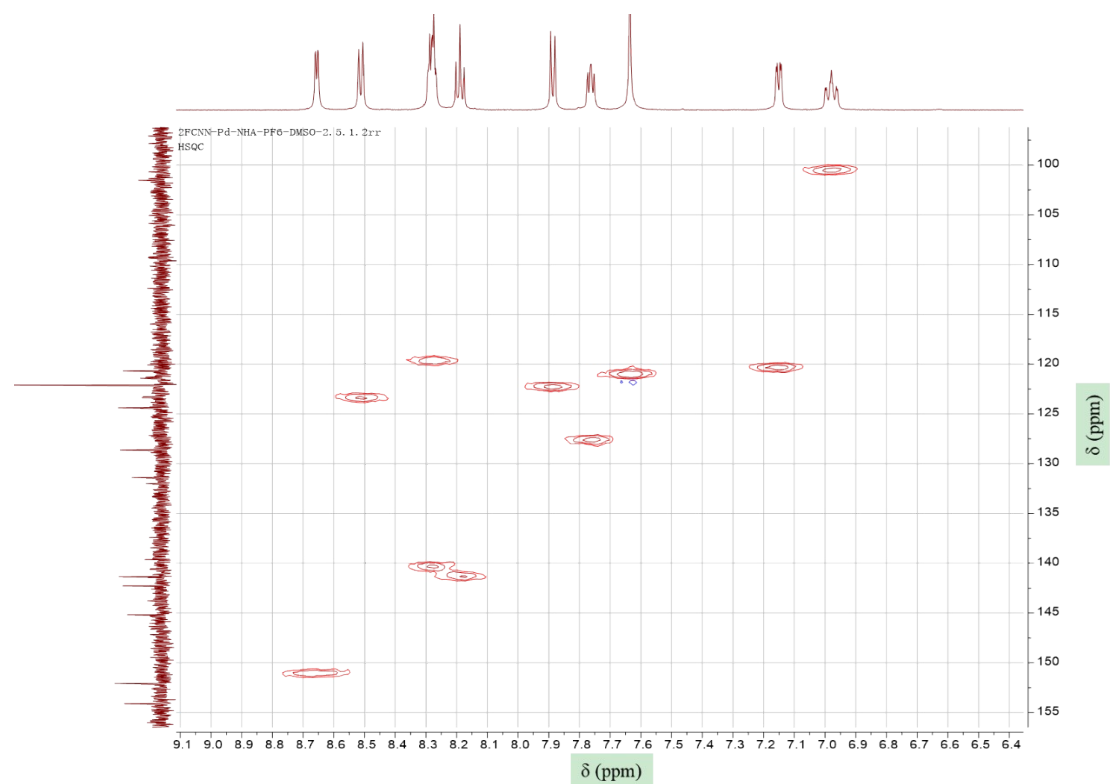

C-H COSY (HSQC, DMSO- $d_6$ ) spectrum of Pd-2-PF<sub>6</sub>

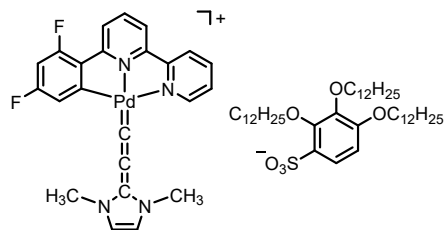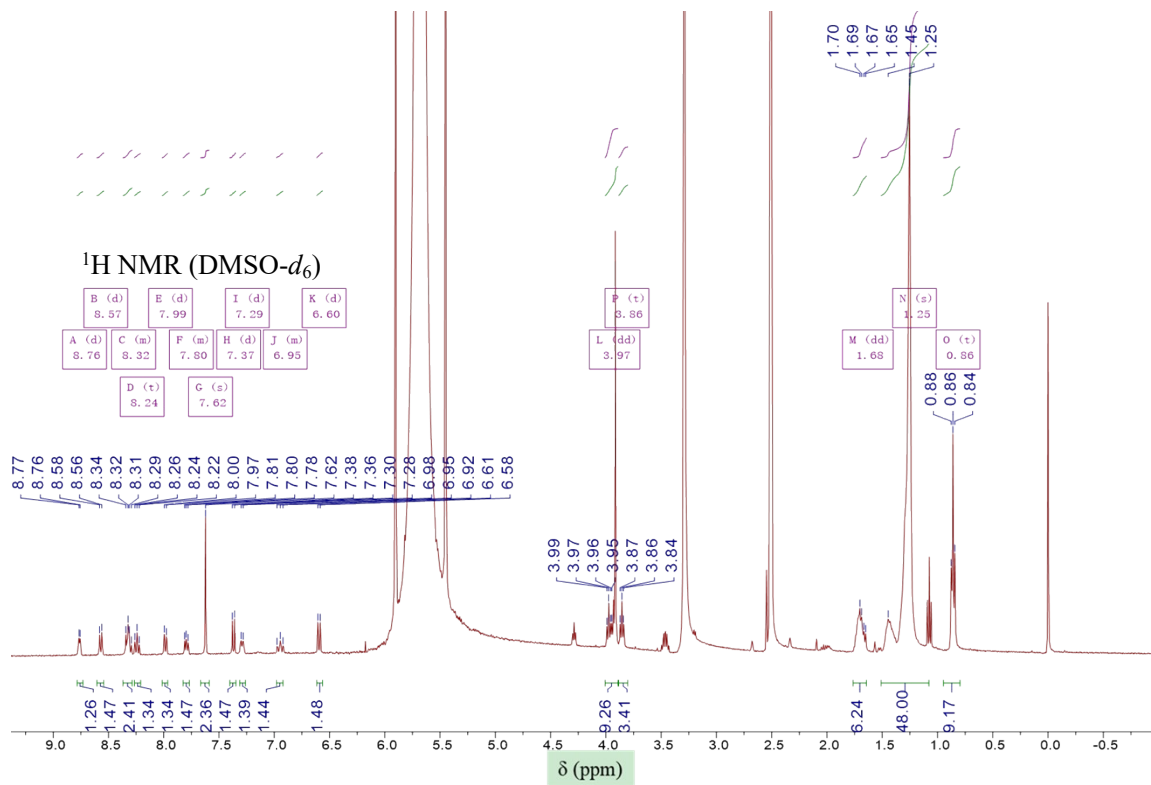

<sup>1</sup>H NMR (400 MHz, DMSO-*d*<sub>6</sub> + minor CD<sub>2</sub>Cl<sub>2</sub>) spectrum of Pd-2-LA

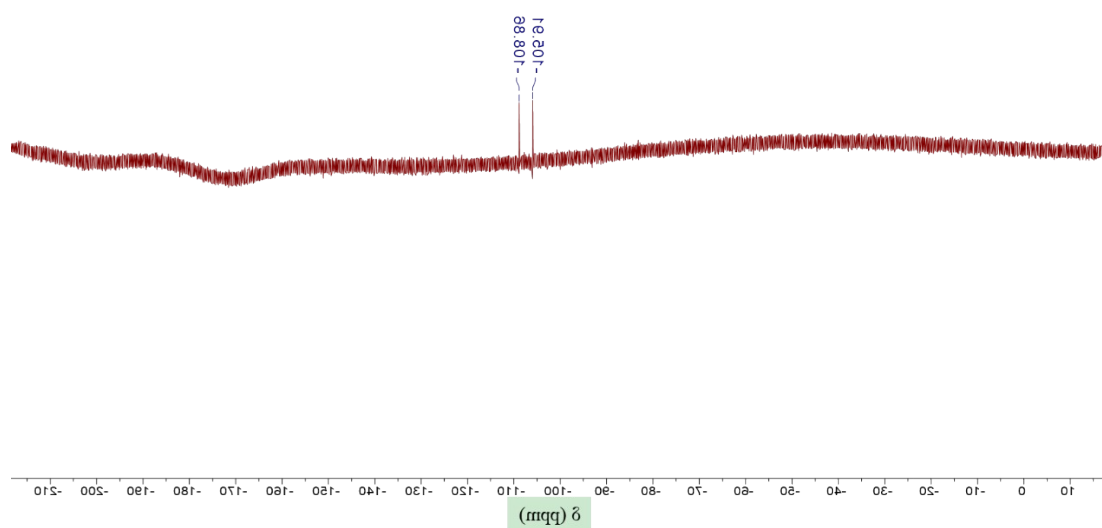

<sup>19</sup>F NMR (376 MHz, DMSO-*d*<sub>6</sub> + minor CD<sub>2</sub>Cl<sub>2</sub>) spectrum of Pd-2-LA

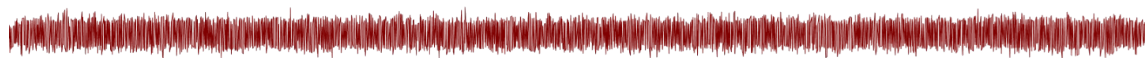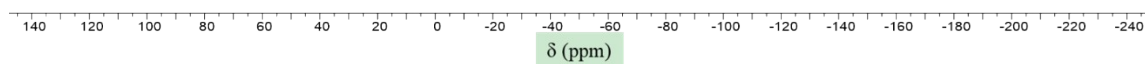

$^{31}\text{P}$  NMR (202 MHz,  $\text{DMSO-}d_6$  + minor  $\text{CD}_2\text{Cl}_2$ ) spectrum of **Pd-2-LA**

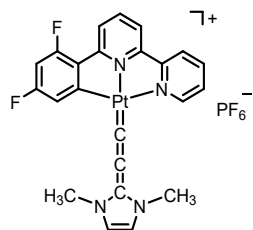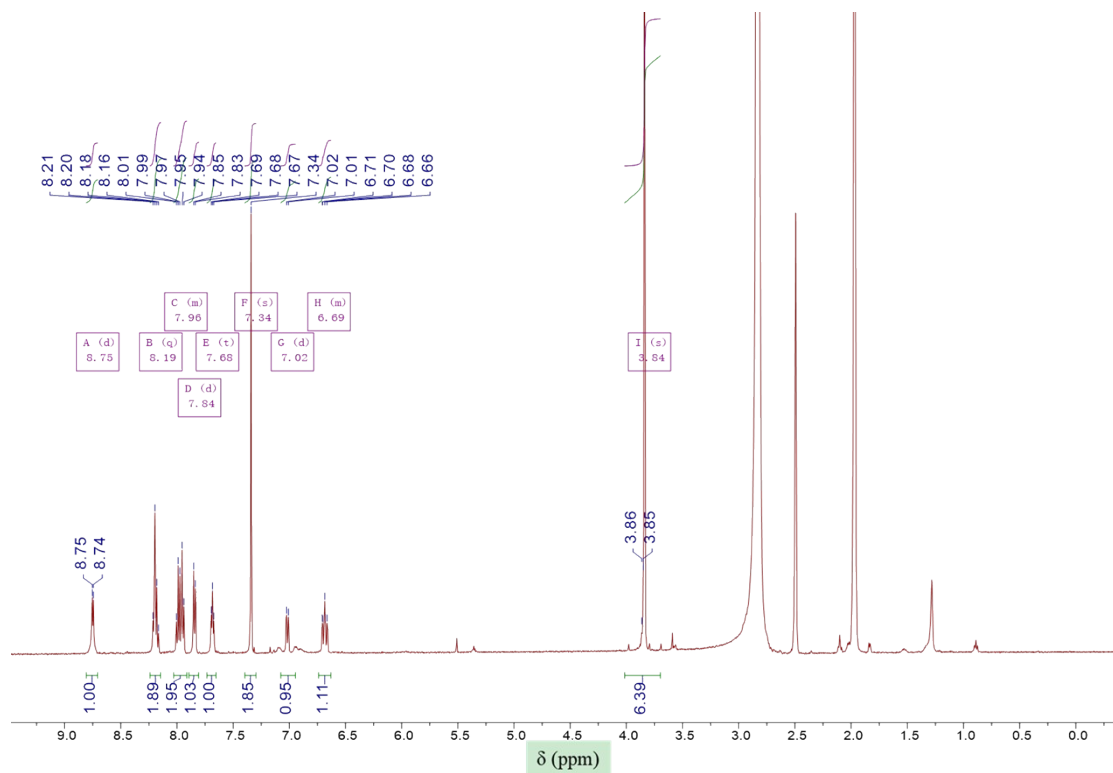

$^1\text{H}$  NMR (500 MHz,  $\text{MeCN-}d_3$ ) spectrum of **Pt-2-PF<sub>6</sub>**

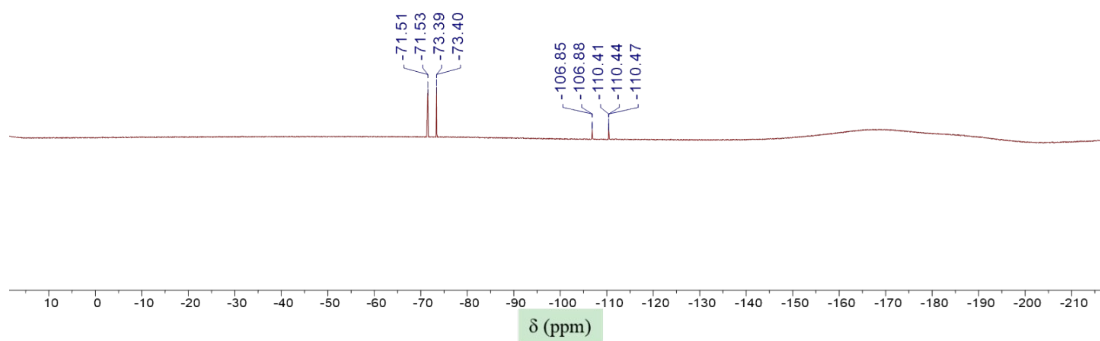

$^{19}\text{F}$  NMR (376 MHz,  $\text{MeCN-}d_3$ ) spectrum of **Pt-2-PF<sub>6</sub>**

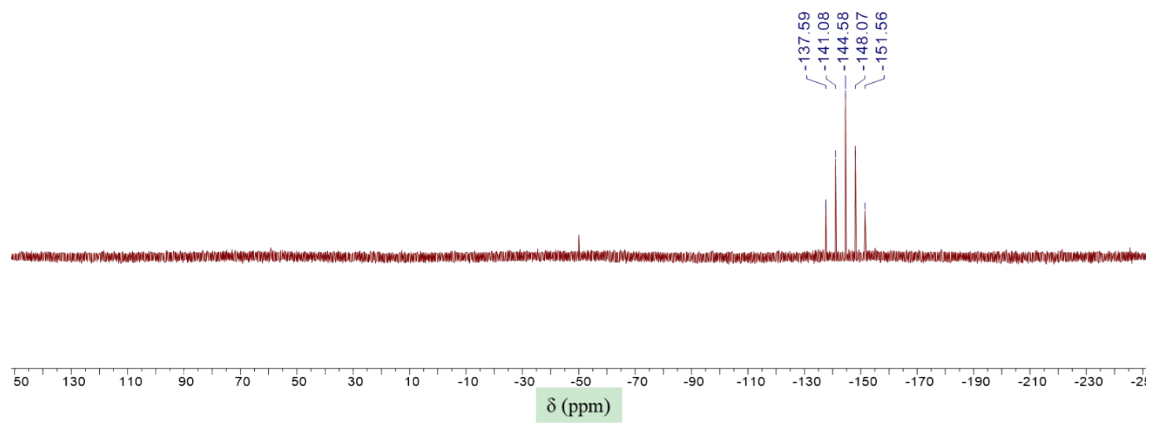

$^{31}\text{P}$  NMR (202 MHz,  $\text{MeCN-}d_3$ ) spectrum of **Pt-2-PF<sub>6</sub>**

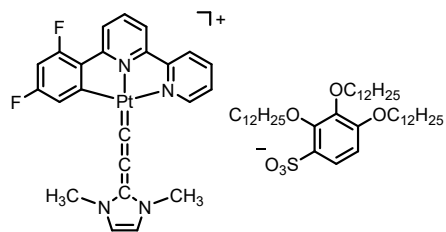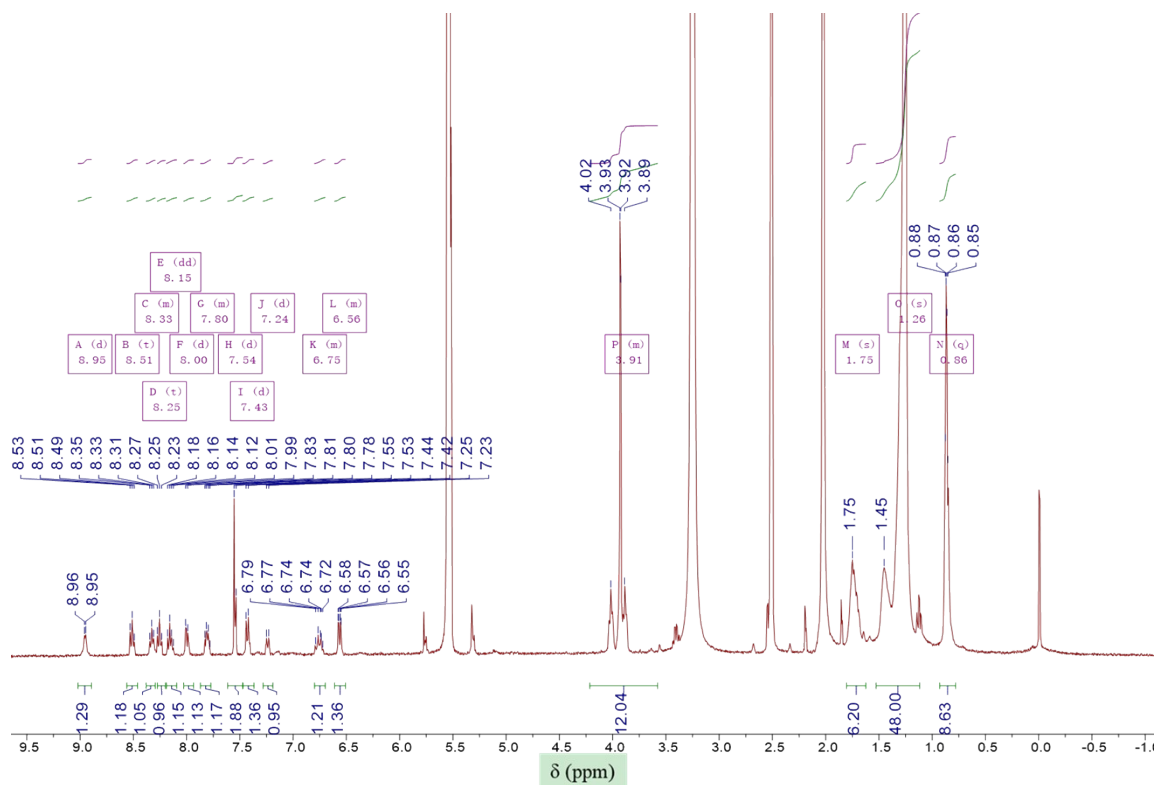

$^1\text{H}$  NMR (400 MHz, DMSO- $d_6$  + minor  $\text{CD}_2\text{Cl}_2$ ) spectrum of Pt-2-LA

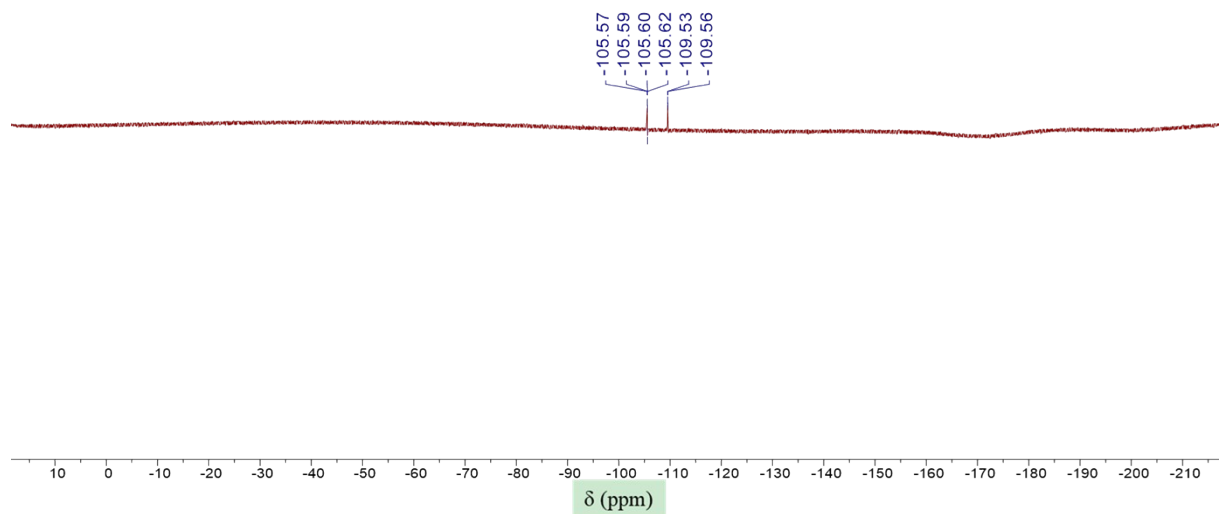

$^{19}\text{F}$  NMR (376 MHz, DMSO- $d_6$  + minor  $\text{CD}_2\text{Cl}_2$ ) spectrum of Pt-2-LA

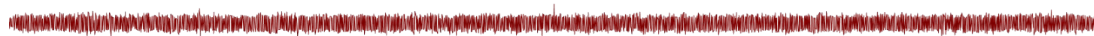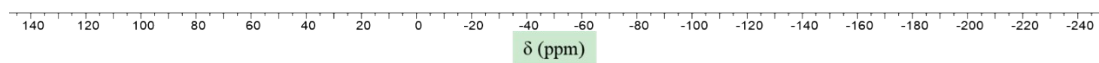

$^{31}\text{P}$  NMR (202 MHz, DMSO- $d_6$  + minor  $\text{CD}_2\text{Cl}_2$ ) spectrum of **Pt-2-LA**



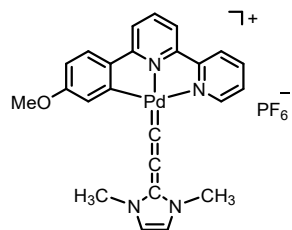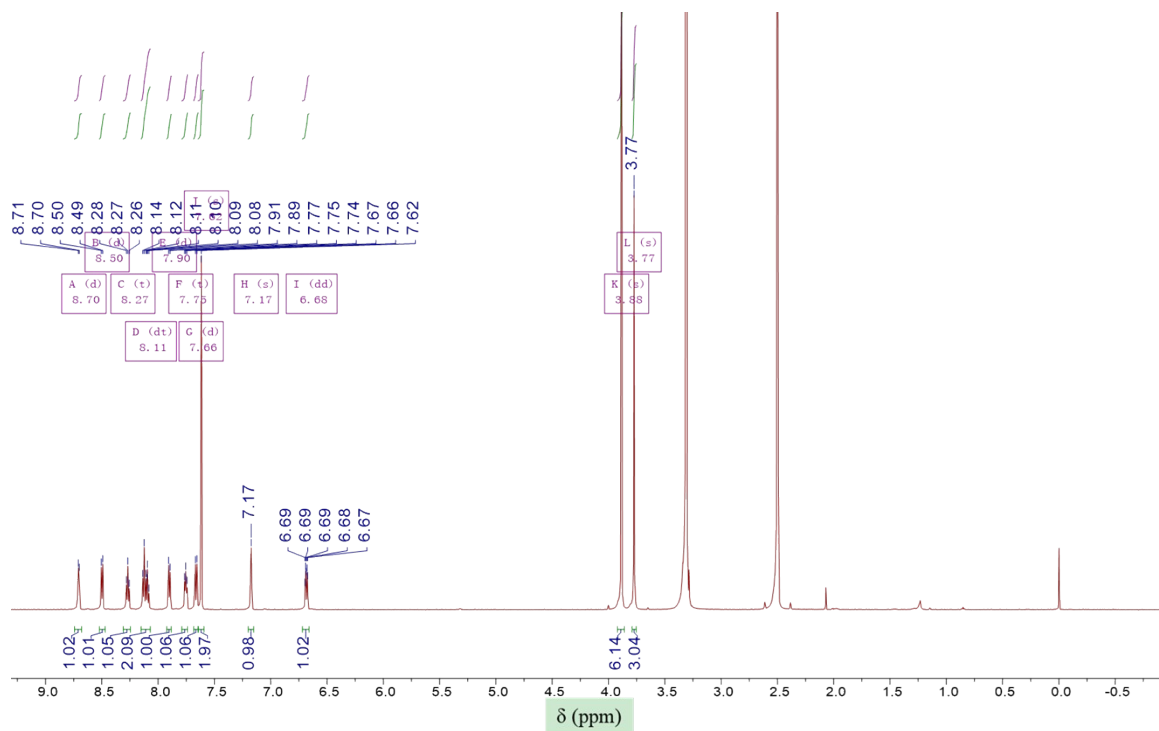

<sup>1</sup>H NMR (600 MHz, DMSO-*d*<sub>6</sub>) spectrum of Pd-3-PF<sub>6</sub>

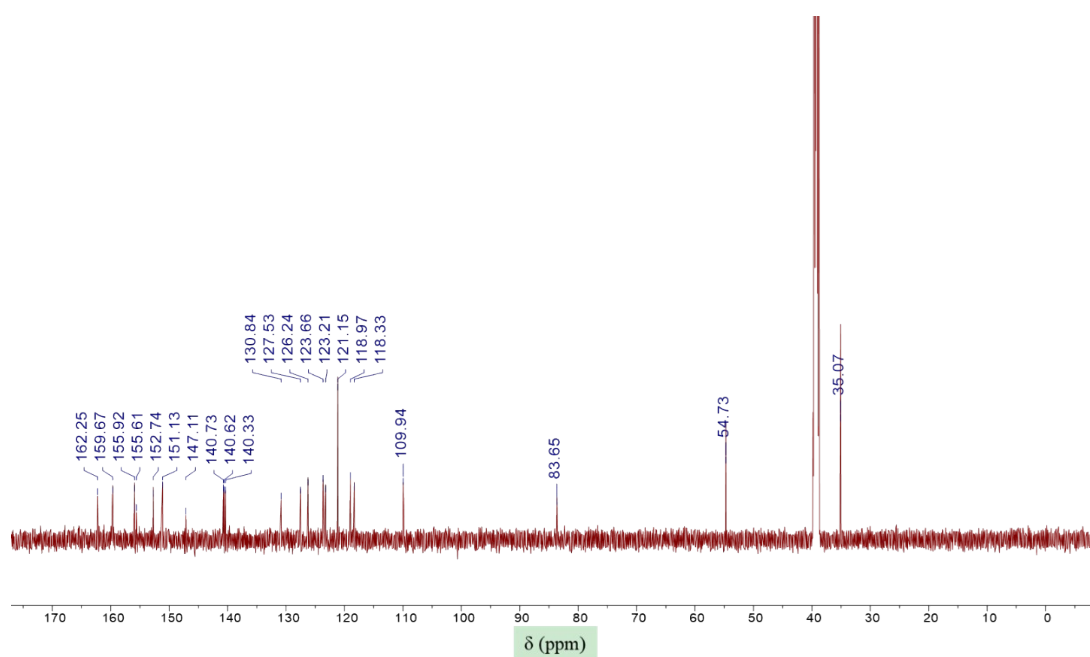

<sup>13</sup>C NMR (151 MHz, DMSO-*d*<sub>6</sub>) spectrum of Pd-3-PF<sub>6</sub>

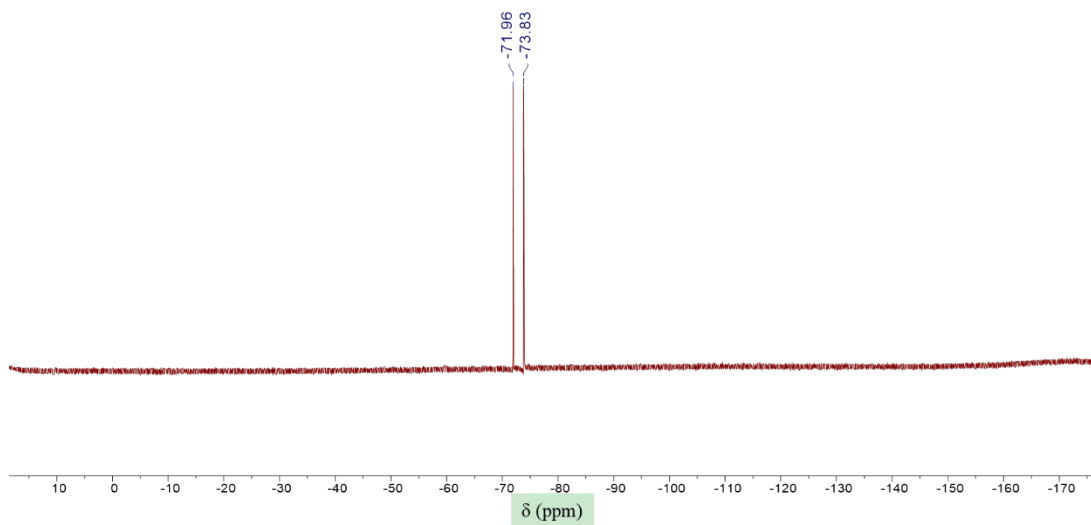

$^{19}\text{F}$  NMR (376 MHz,  $\text{MeCN-}d_3$ ) spectrum of **Pd-3-PF<sub>6</sub>**

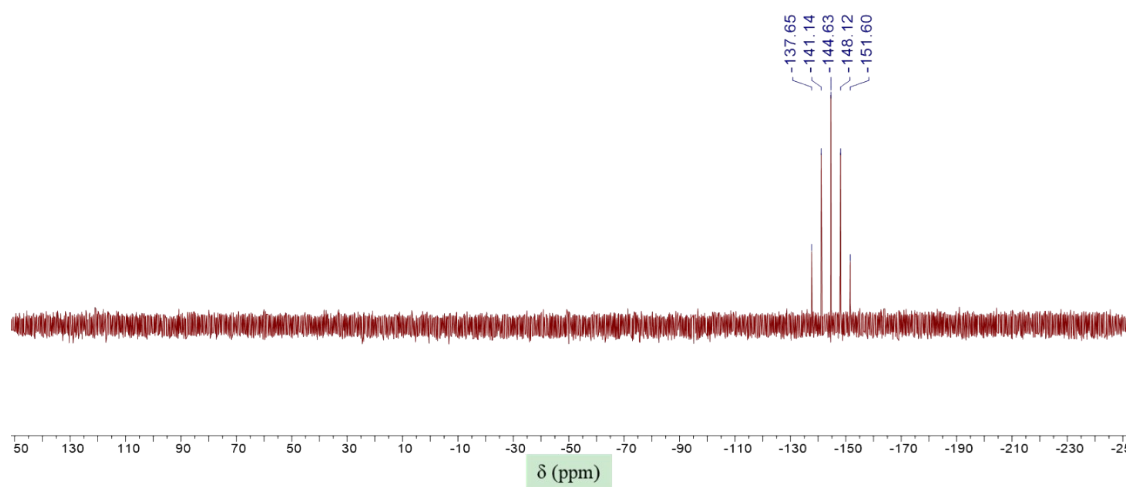

$^{31}\text{P}$  NMR (202 MHz,  $\text{MeCN-}d_3$ ) spectrum of **Pd-3-PF<sub>6</sub>**

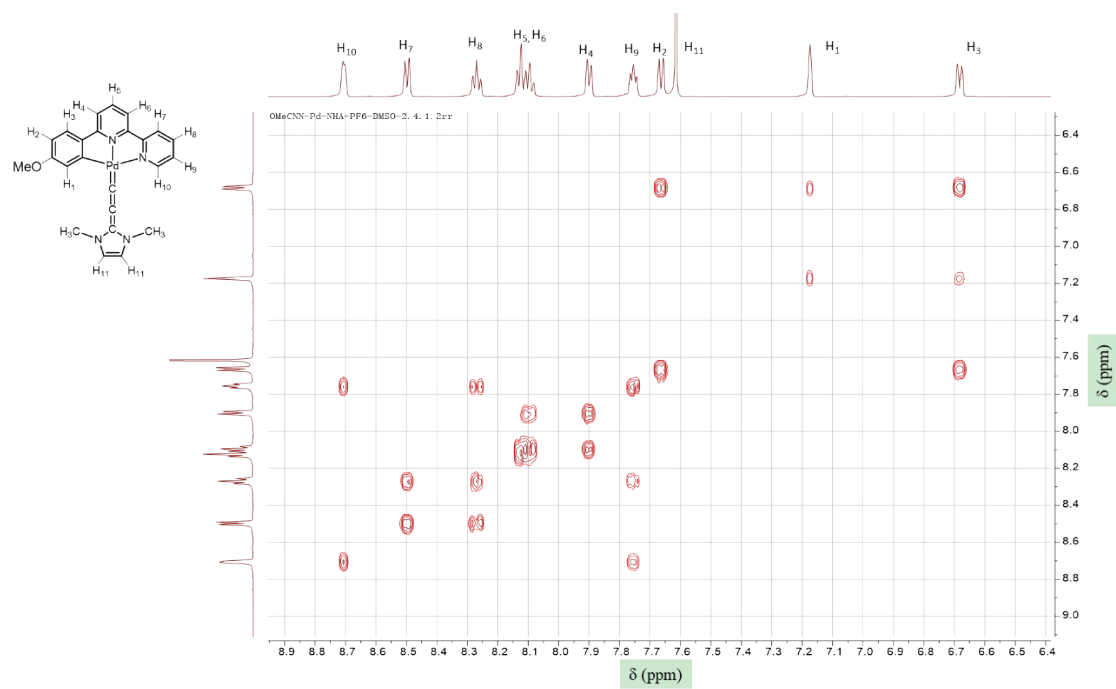

$^1\text{H}$ - $^1\text{H}$  COSY (DMSO- $d_6$ ) spectrum of Pd-3-PF<sub>6</sub>

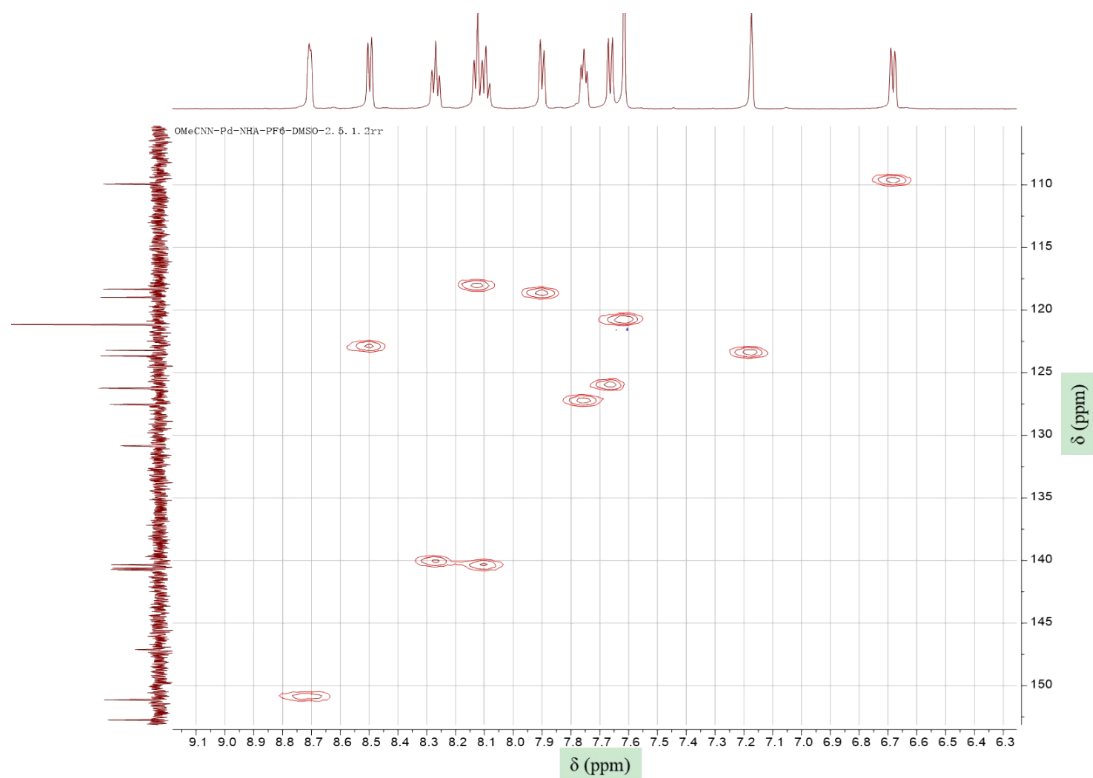

C-H COSY (HSQC, DMSO- $d_6$ ) spectrum of Pd-3-PF<sub>6</sub>

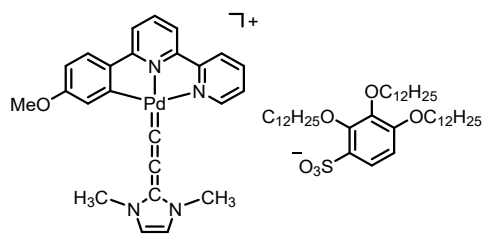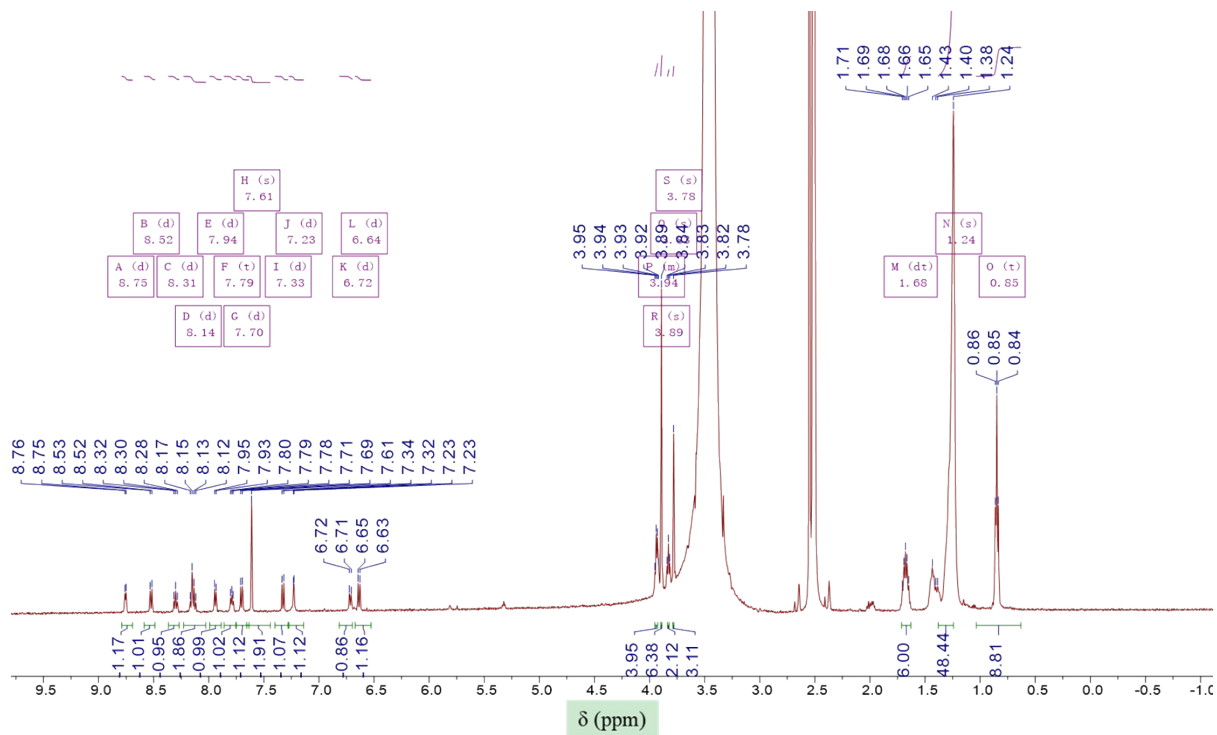

**<sup>1</sup>H NMR (500 MHz, DMSO-*d*<sub>6</sub>) spectrum of Pd-3-LA**

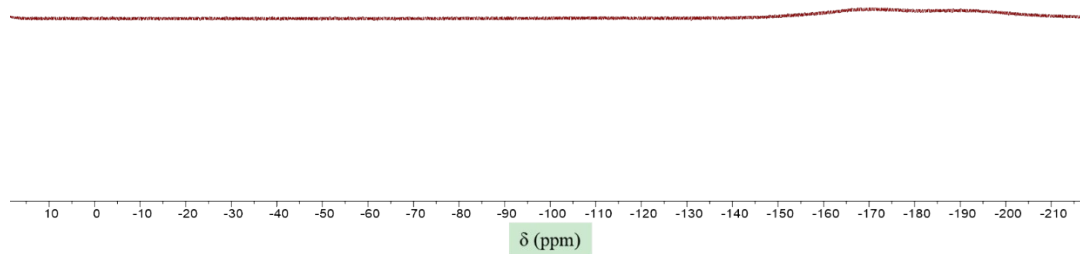

**<sup>19</sup>F NMR (376 MHz, DMSO-*d*<sub>6</sub>) spectrum of Pd-3-LA**

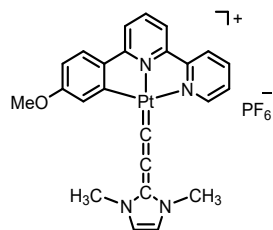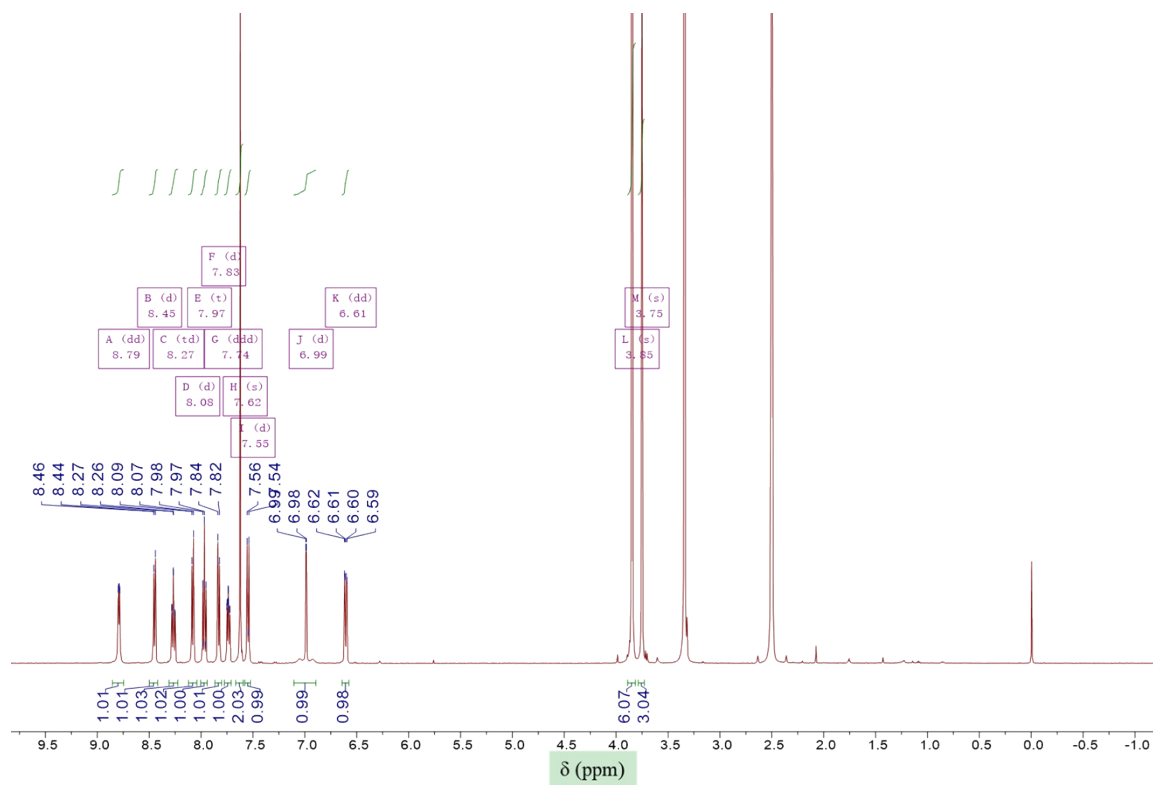

<sup>1</sup>H NMR (500 MHz, DMSO-*d*<sub>6</sub>) spectrum of Pt-3-PF<sub>6</sub>

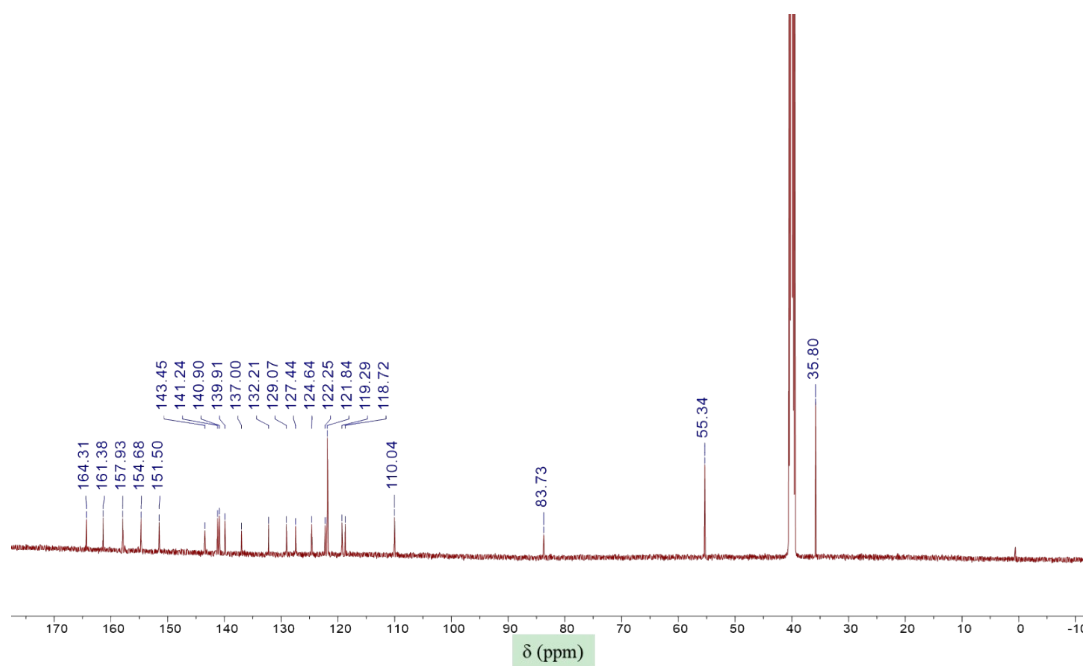

<sup>13</sup>C NMR (126 MHz, DMSO-*d*<sub>6</sub>) spectrum of Pt-3-PF<sub>6</sub>

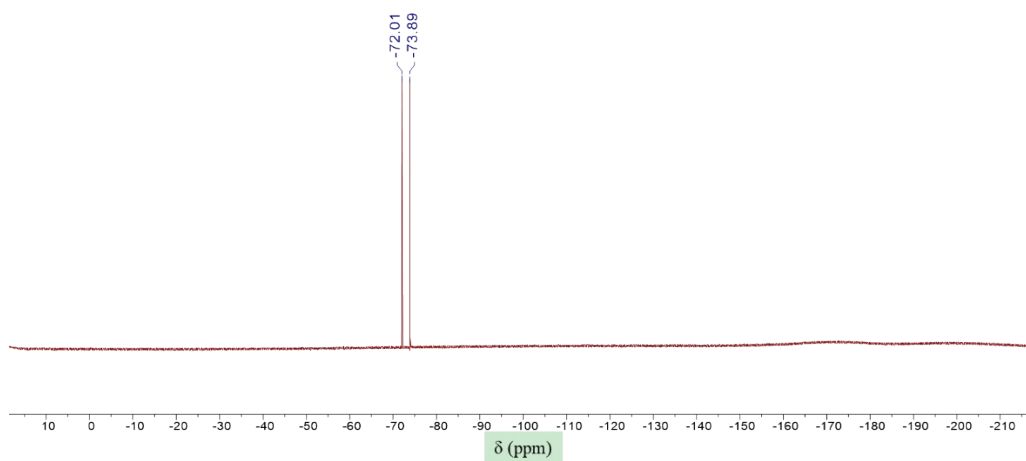

$^{19}\text{F}$  NMR (376 MHz,  $\text{MeCN-}d_3$ ) spectrum of **Pt-3-PF<sub>6</sub>**

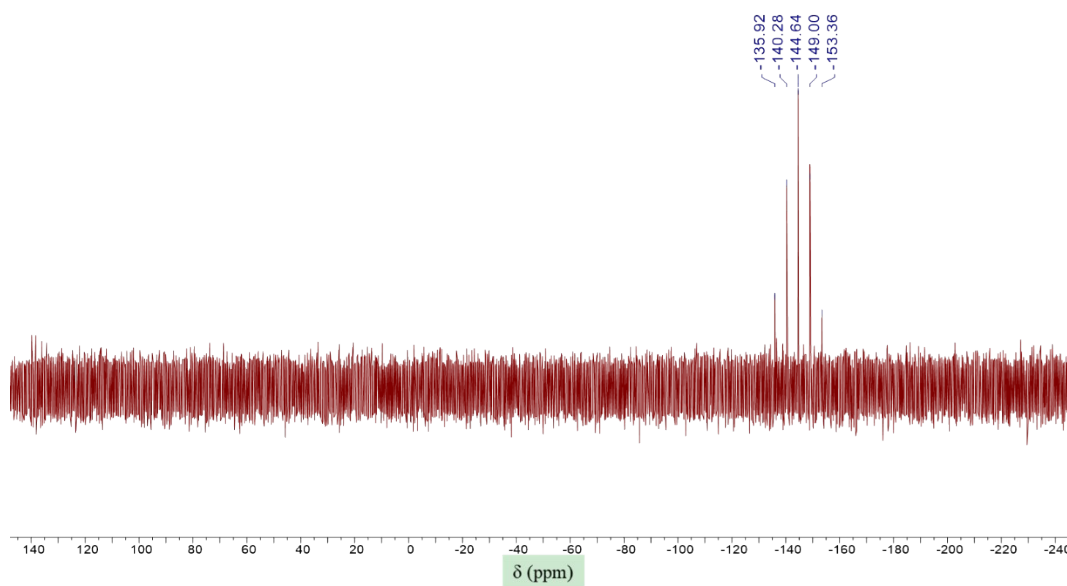

$^{31}\text{P}$  NMR (162 MHz,  $\text{MeCN-}d_3$ ) spectrum of **Pt-3-PF<sub>6</sub>**

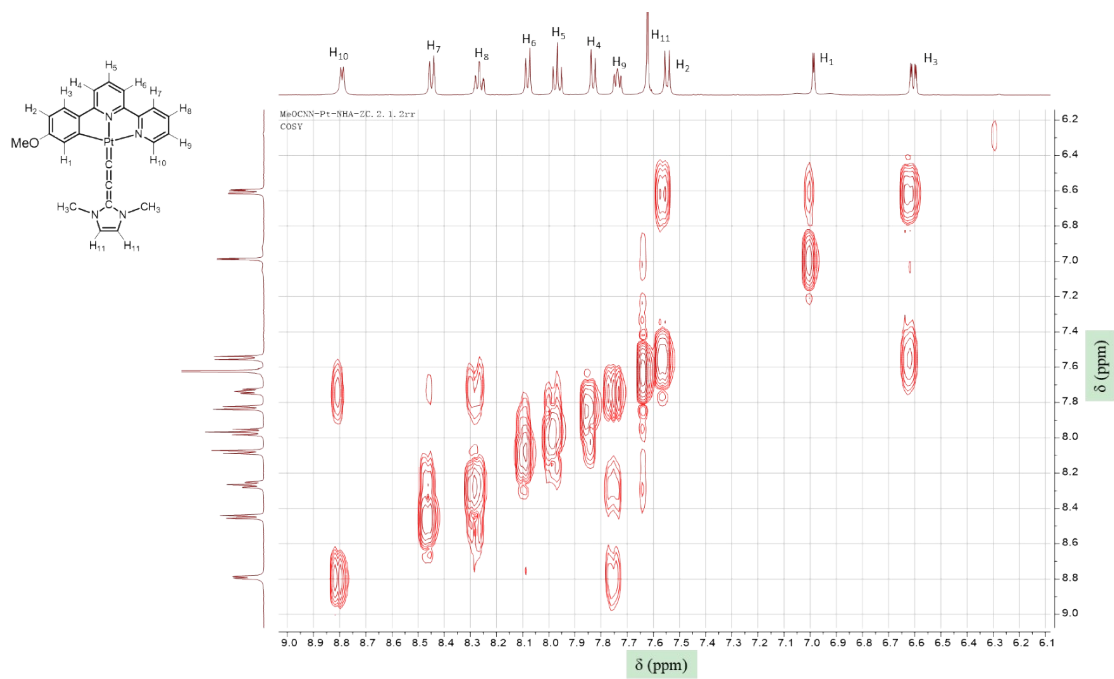

$^1\text{H}$ - $^1\text{H}$  COSY (DMSO- $d_6$ ) spectrum of **Pt-3-PF<sub>6</sub>**

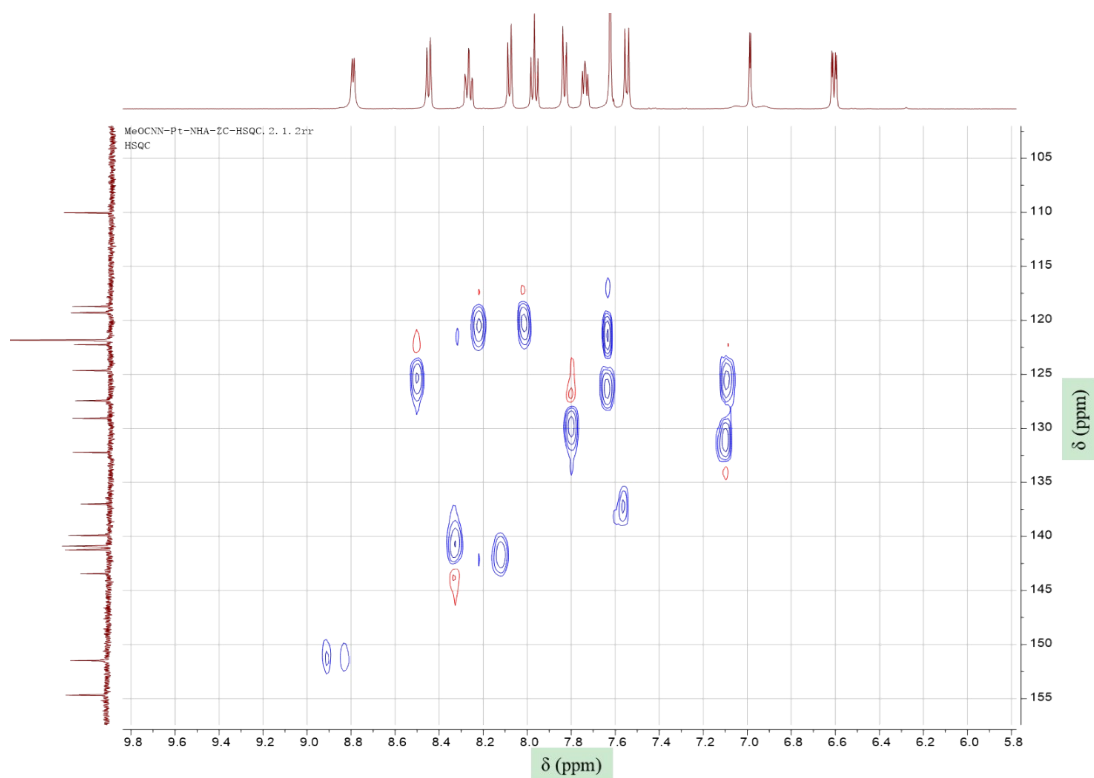

C-H COSY (HSQC, DMSO- $d_6$ ) spectrum of **Pt-3-PF<sub>6</sub>**

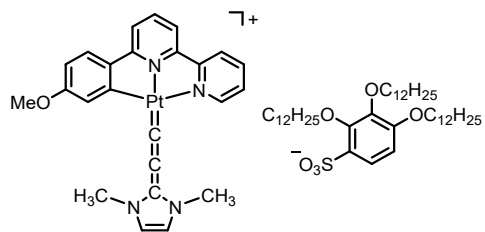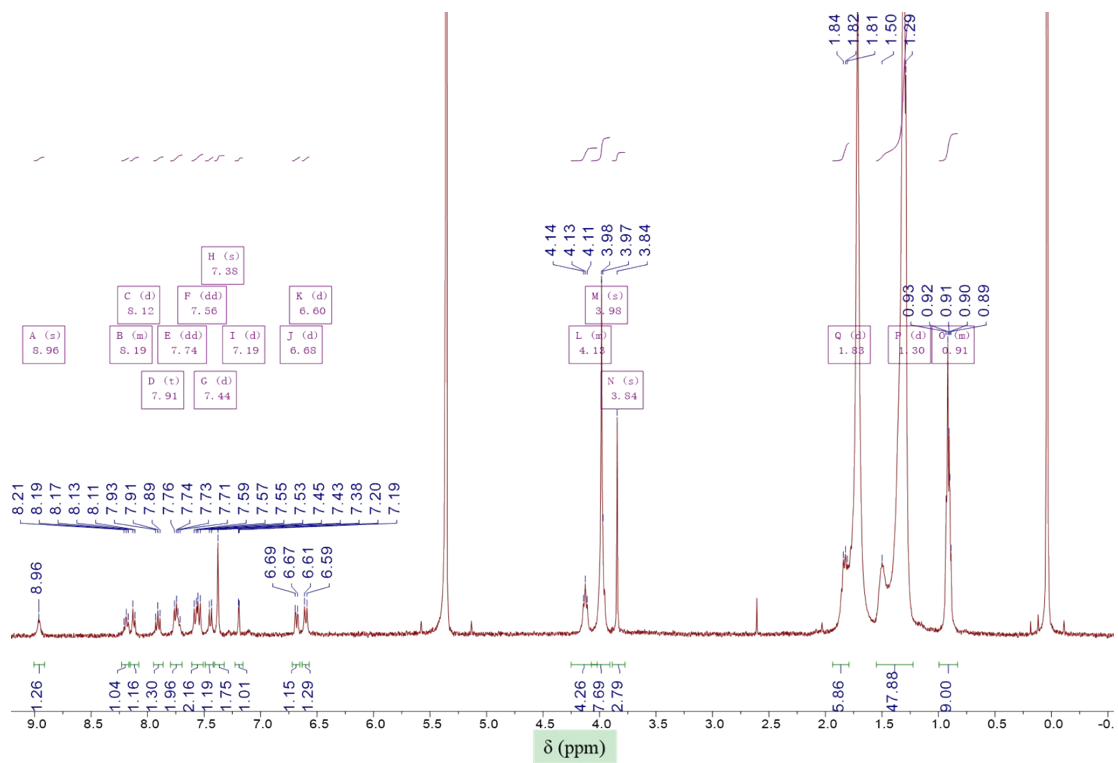

$^1\text{H}$  NMR (400 MHz,  $\text{CD}_2\text{Cl}_2$ ) spectrum of Pt-3-LA

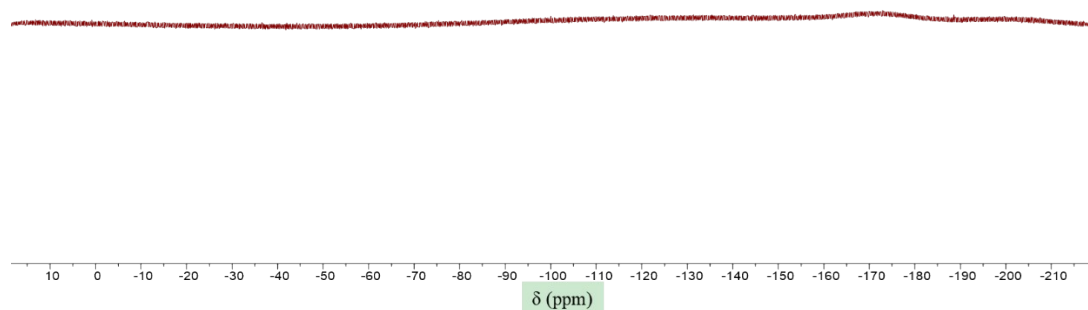

$^{19}\text{F}$  NMR (376 MHz,  $\text{DMSO}-d_6$ ) spectrum of Pt-3-LA





## High Resolution Mass Spectra

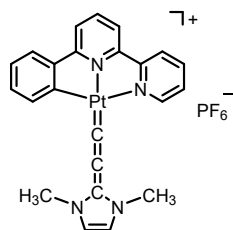

### Positive mode:

pt-1-pf6 #9 RT: 0.08 AV: 1 NL: 1.93E9  
T: FTMS + p ESI Full ms [100.0000-1500.0000]

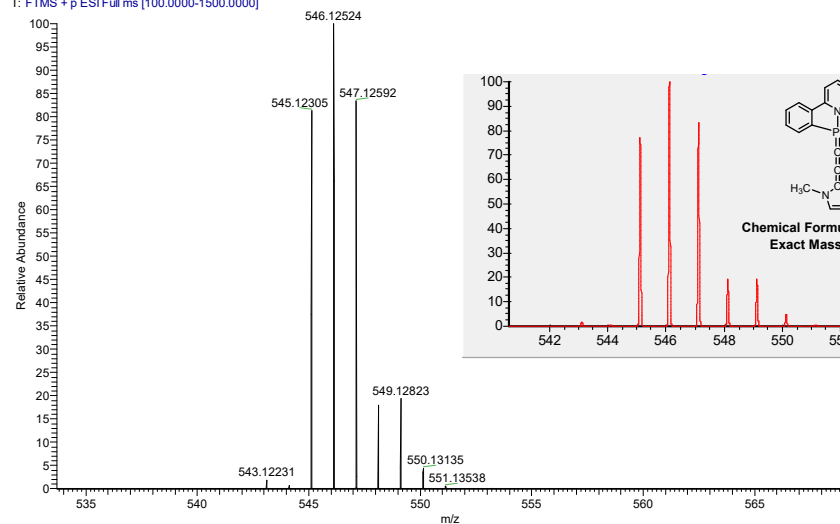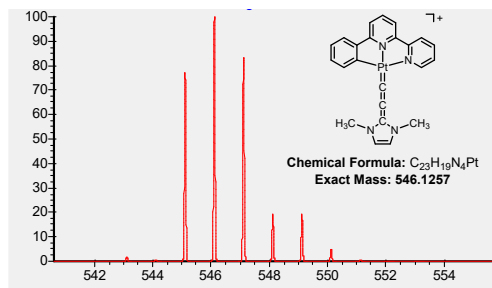

### Negative mode:

pt-1-pf6 #4-20 RT: 0.03-0.18 AV: 9 NL: 1.42E9  
T: FTMS - p ESI Full ms [100.0000-1500.0000]

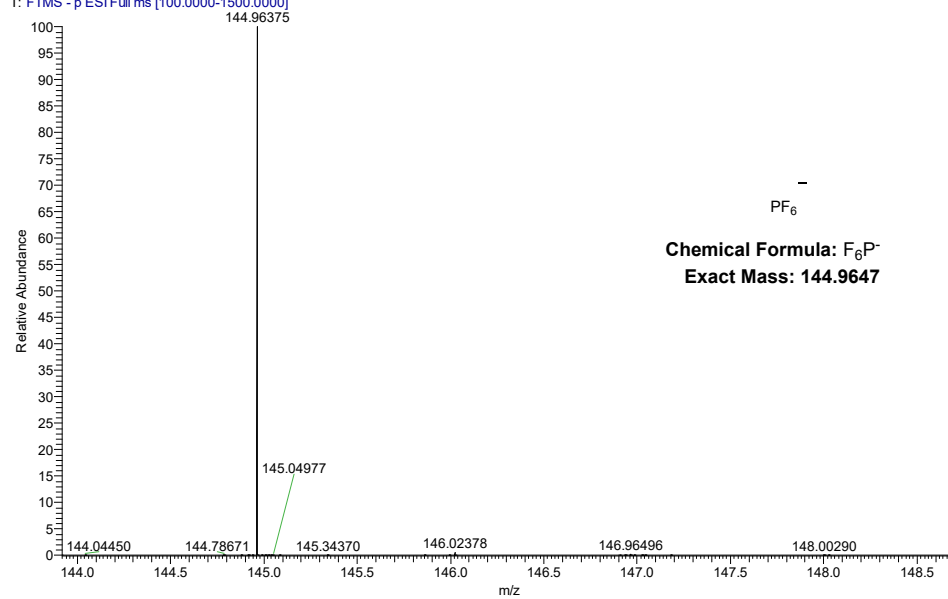

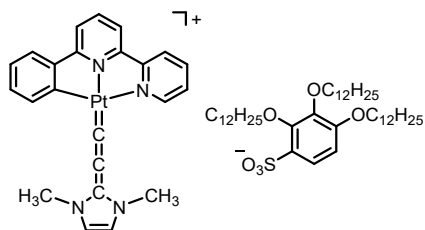

Positive mode:

pt-1-ia #9 RT: 0.08 AV: 1 NL: 3.25E9  
T: FTMS + p ESI Full ms [100.0000-1500.0000]

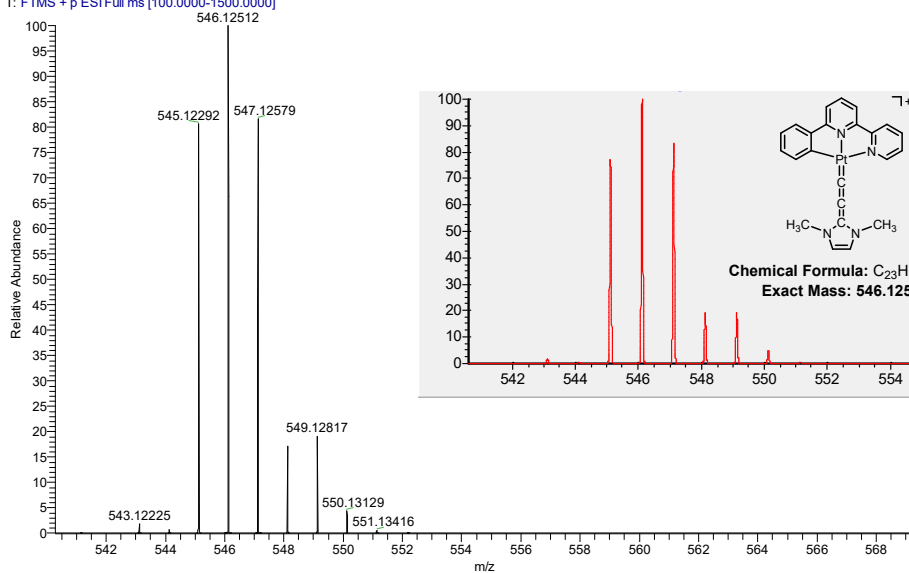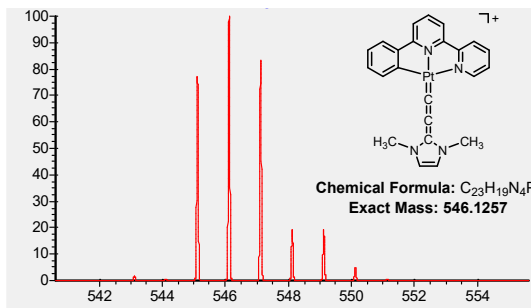

Negative mode:

pt-1-ia #6 RT: 0.05 AV: 1 NL: 1.96E7  
T: FTMS - p ESI Full ms [100.0000-1500.0000]

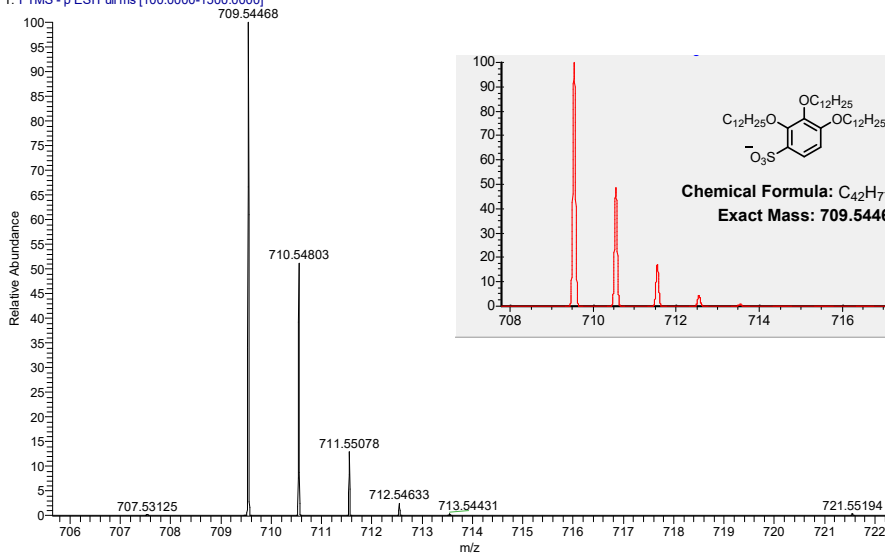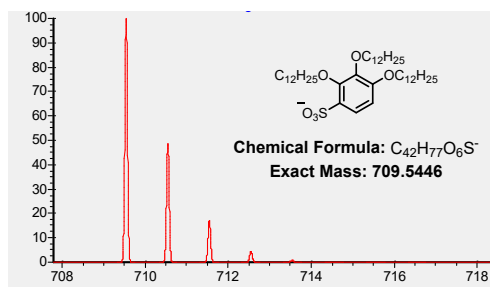

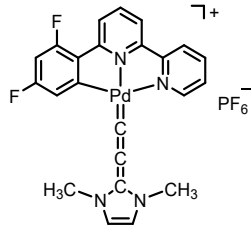

Positive mode:

pd-2-pf6 #9 RT: 0.08 AV: 1 NL: 4.64E8  
T: FTMS + p ESI Full ms [100.0000-1500.0000]

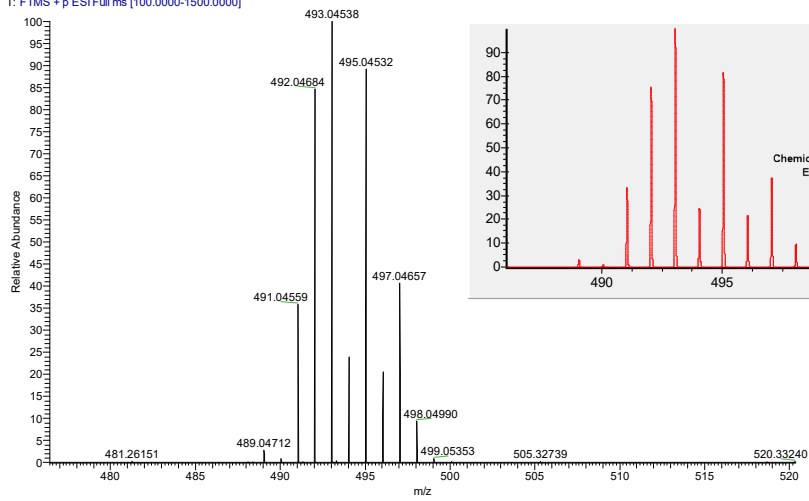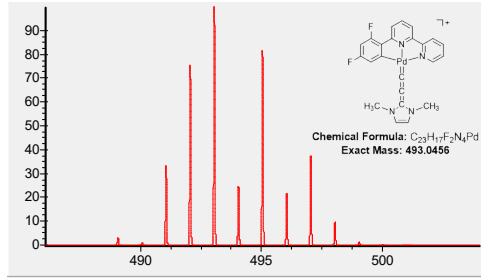

Negative mode:

pd-2-pf6 #6-14 RT: 0.05-0.13 AV: 5 NL: 8.92E8  
T: FTMS - p ESI Full ms [100.0000-1500.0000]

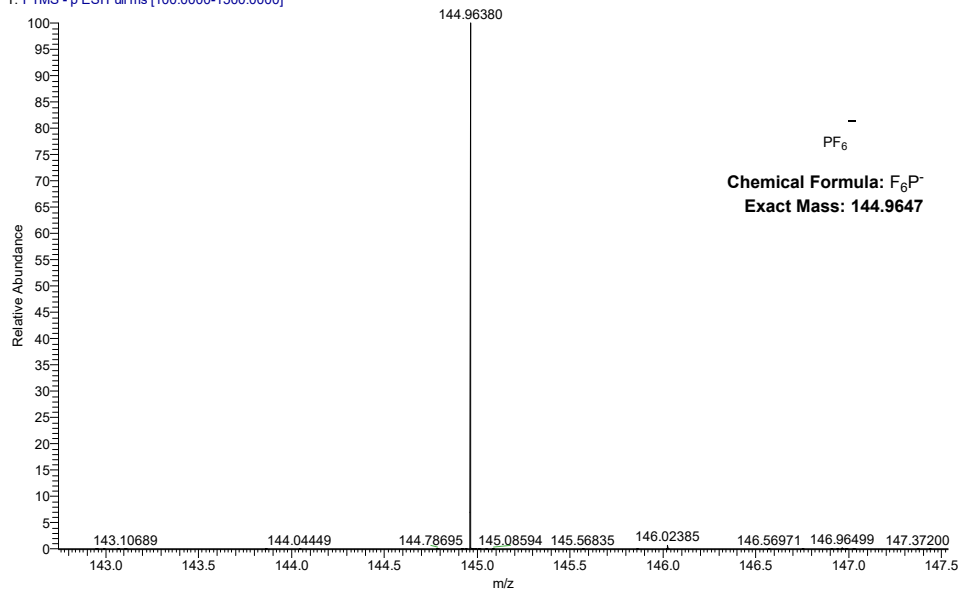

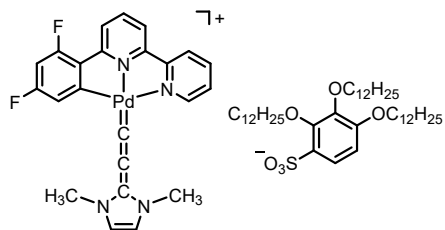

### Positive mode:

pd-2-ia #9 RT: 0.08 AV: 1 NL: 2.57E9  
T: FTMS + p ESI Full ms [100.0000-1500.0000]

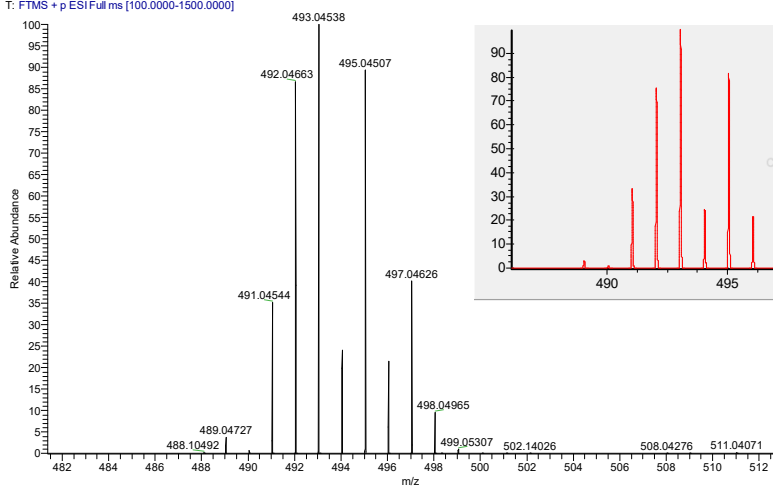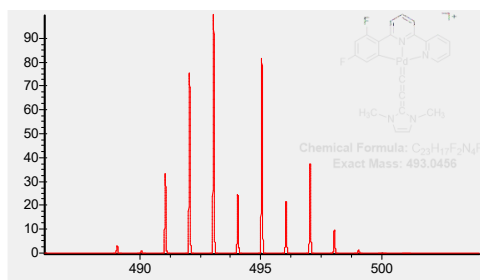

### Negative mode:

pd-2-ia #5-17 RT: 0.05-0.15 AV: 6 NL: 5.21E8  
T: FTMS - p ESI Full ms [100.0000-1500.0000]

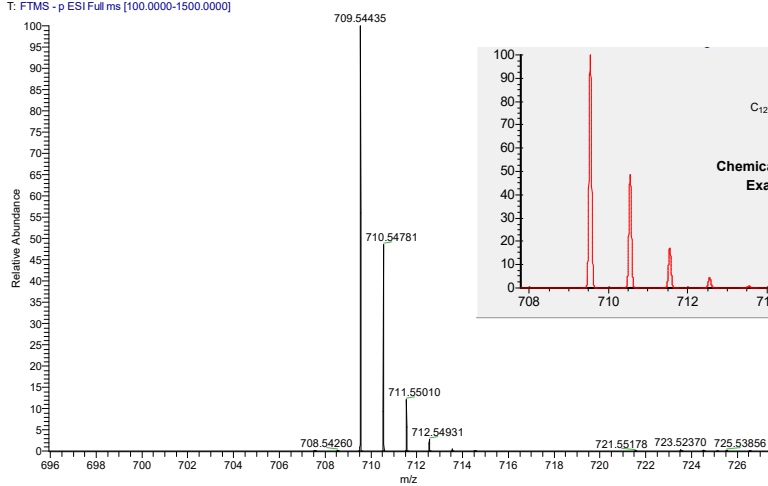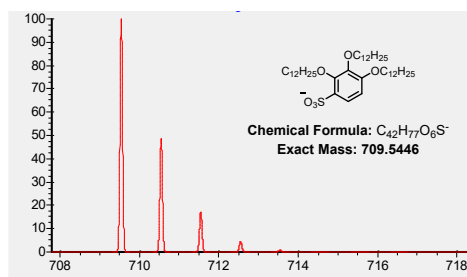

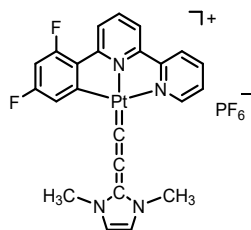

Positive mode:

pt-2-pf6 #9 RT: 0.08 AV: 1 NL: 2.99E9  
T: FTMS + p ESI Full ms [100.0000-1500.0000]

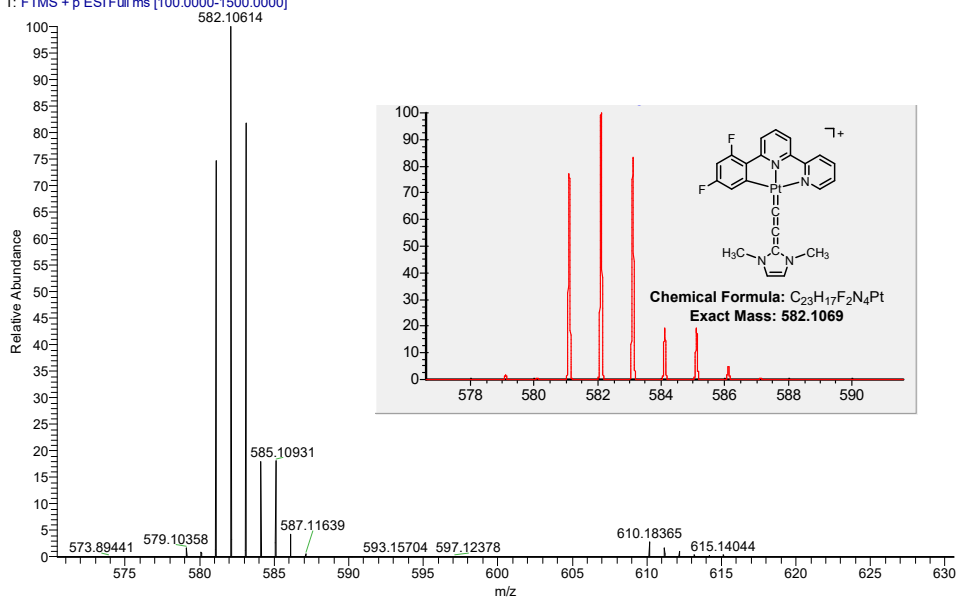

Negative mode:

pt-2-pf6 #10 RT: 0.09 AV: 1 NL: 8.73E9  
T: FTMS - p ESI Full ms [100.0000-1500.0000]

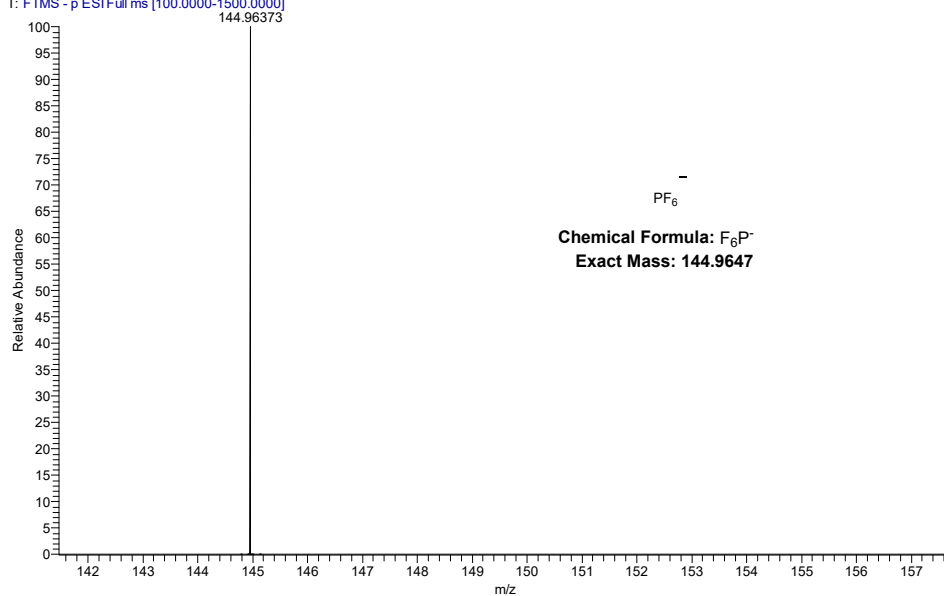

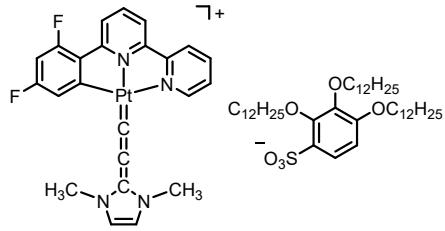

Positive mode:

pt-2-la #9 RT: 0.08 AV: 1 NL: 3.53E9  
T: FTMS + p ESI Full ms [100.0000-1500.0000]

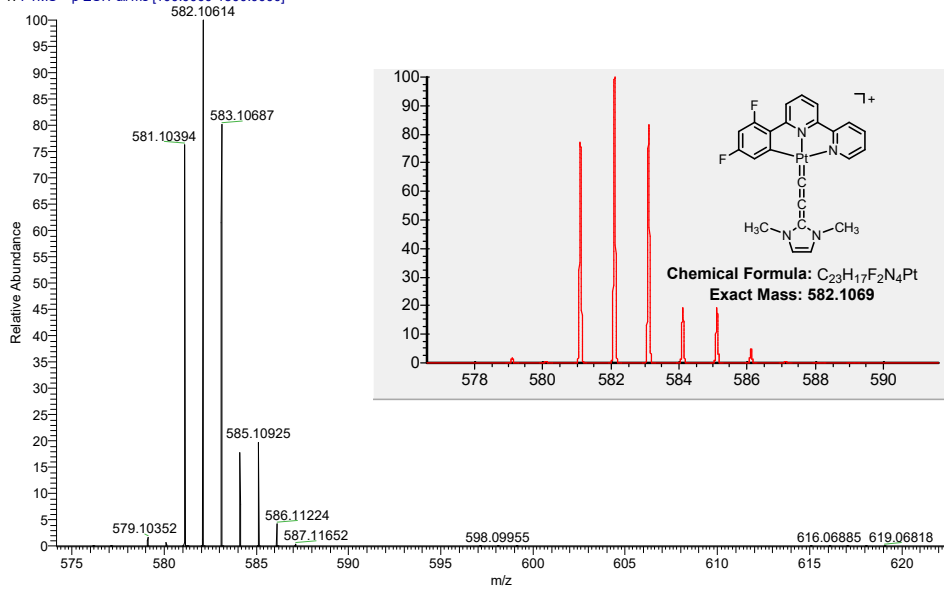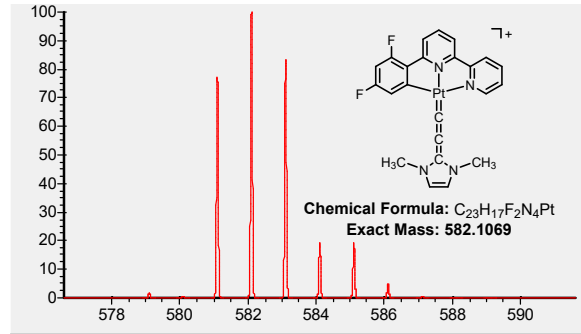

Negative mode:

pt-2-la #4-22 RT: 0.03-0.20 AV: 10 NL: 3.68E8  
T: FTMS - p ESI Full ms [100.0000-1500.0000]

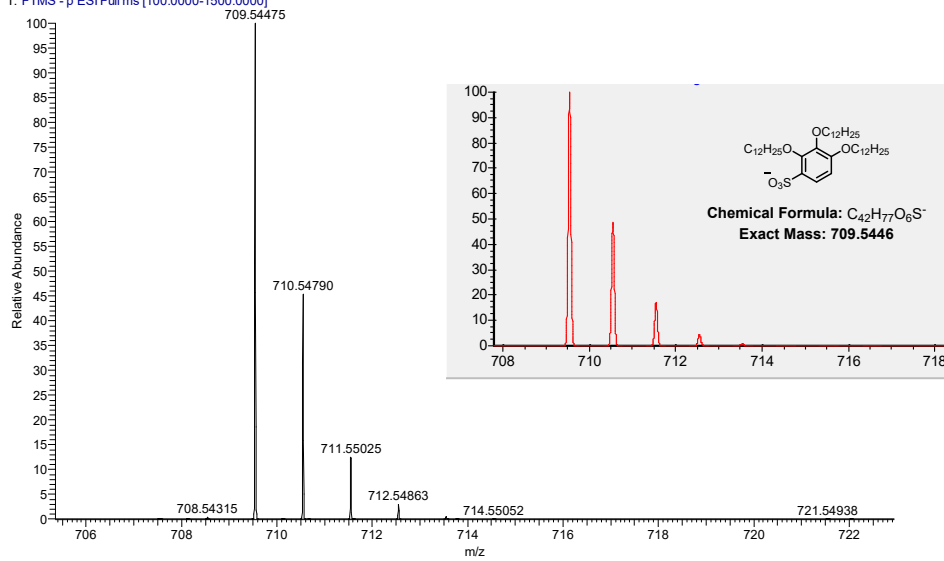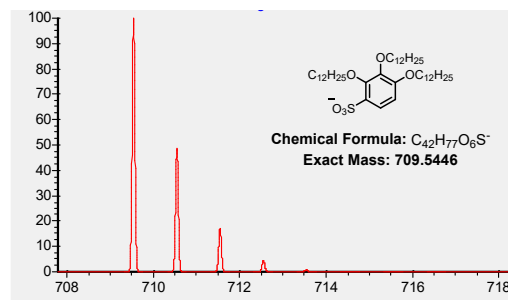



Positive mode:

pd-3-pf6 #9 RT: 0.08 AV: 1 NL: 5.23E8  
T: FTMS + p ESI Full ms [100.0000-1500.0000]

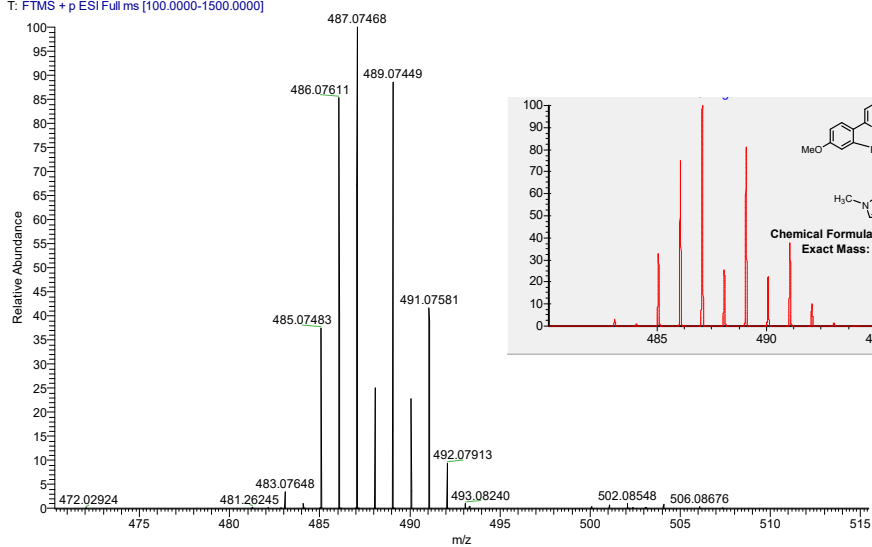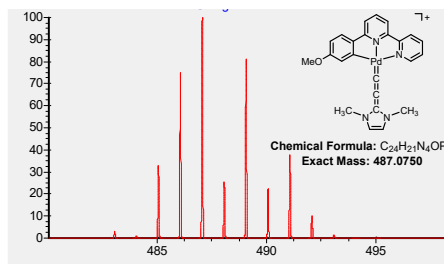

Negative mode:

pd-3-pf6 #5-20 RT: 0.05-0.18 AV: 8 NL: 6.82E8  
T: FTMS - p ESI Full ms [100.0000-1500.0000]

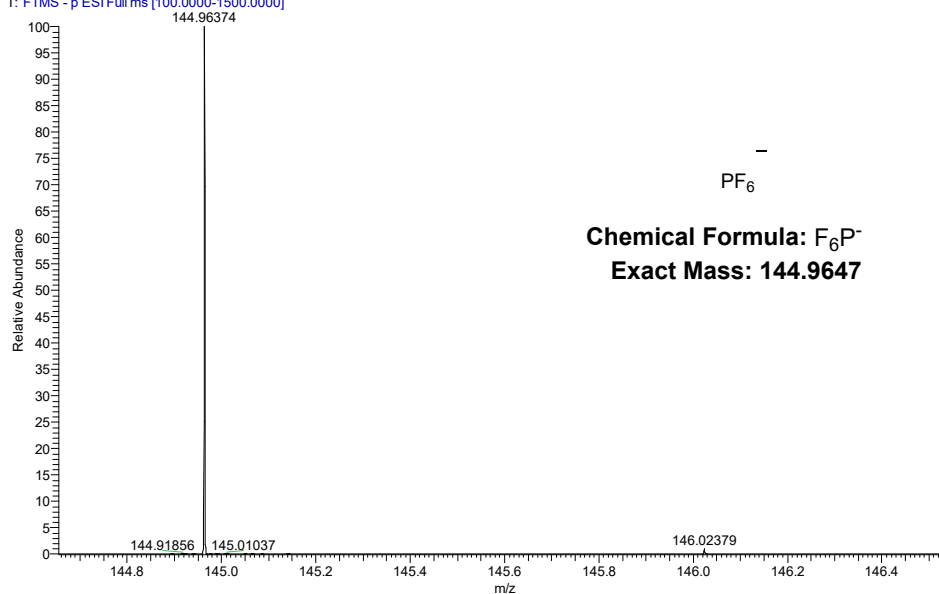



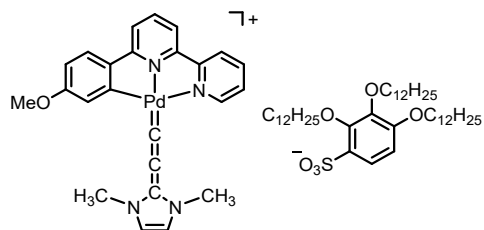

### Positive mode:

pd-3-la #9 RT: 0.08 AV: 1 NL: 1.15E9  
T: FTMS + p ESI Full ms [100.0000-1500.0000]

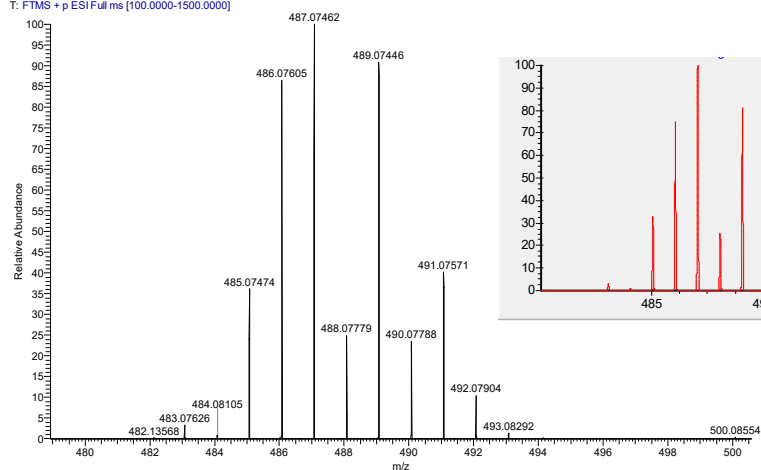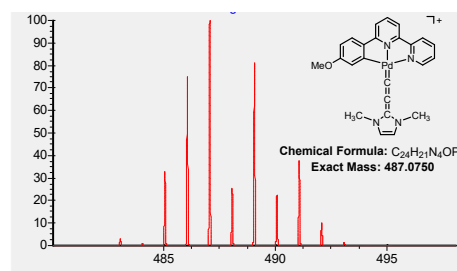

### Negative mode:

pd-3-la #8 RT: 0.07 AV: 1 NL: 5.41E8  
T: FTMS - p ESI Full ms [100.0000-1500.0000]

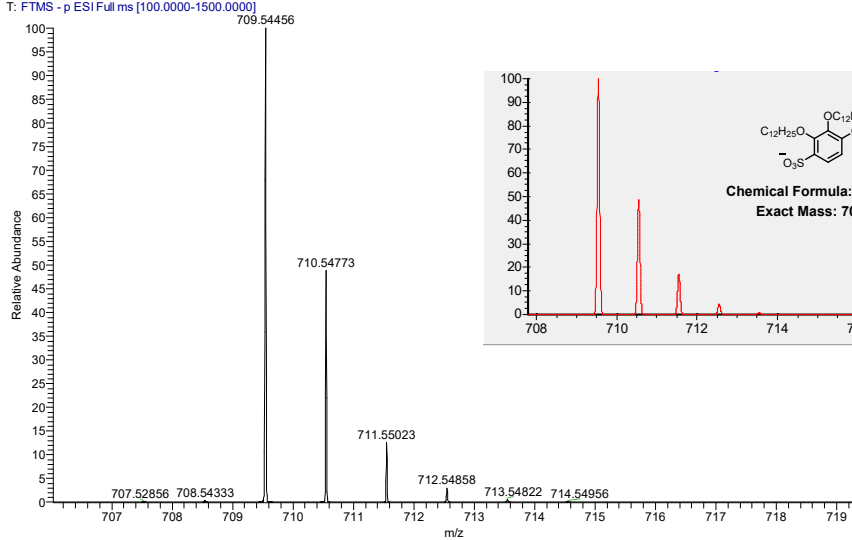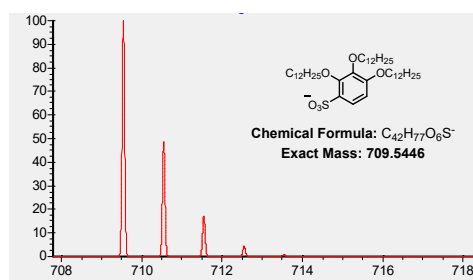



Positive mode:

pt-3-pf6 #9 RT: 0.08 AV: 1 NL: 1.55E9  
T: FTMS + p ESI Full ms [100.0000-1500.0000]

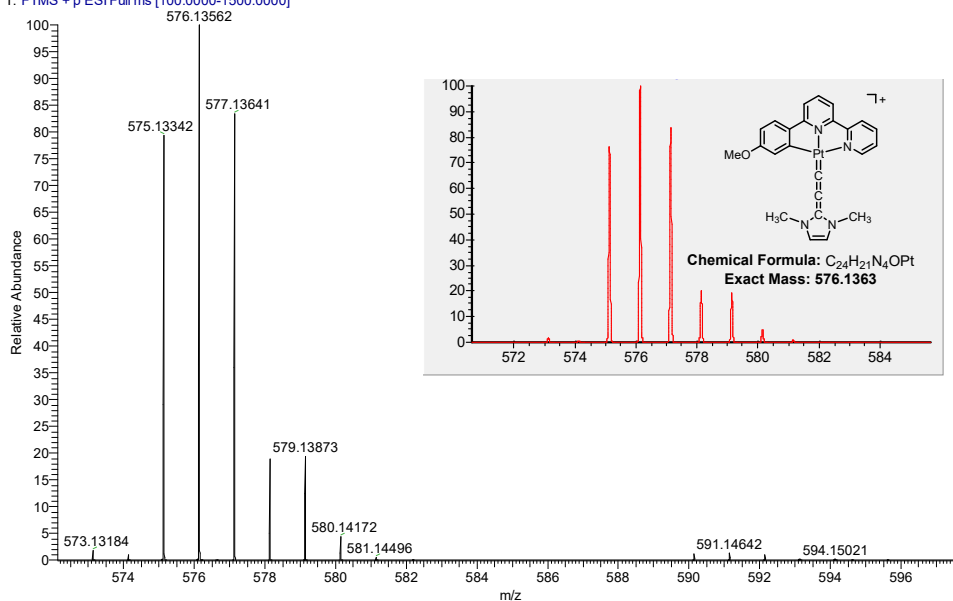

Negative mode:

pt-3-pf6 #10 RT: 0.09 AV: 1 NL: 8.81E9  
T: FTMS - p ESI Full ms [100.0000-1500.0000]

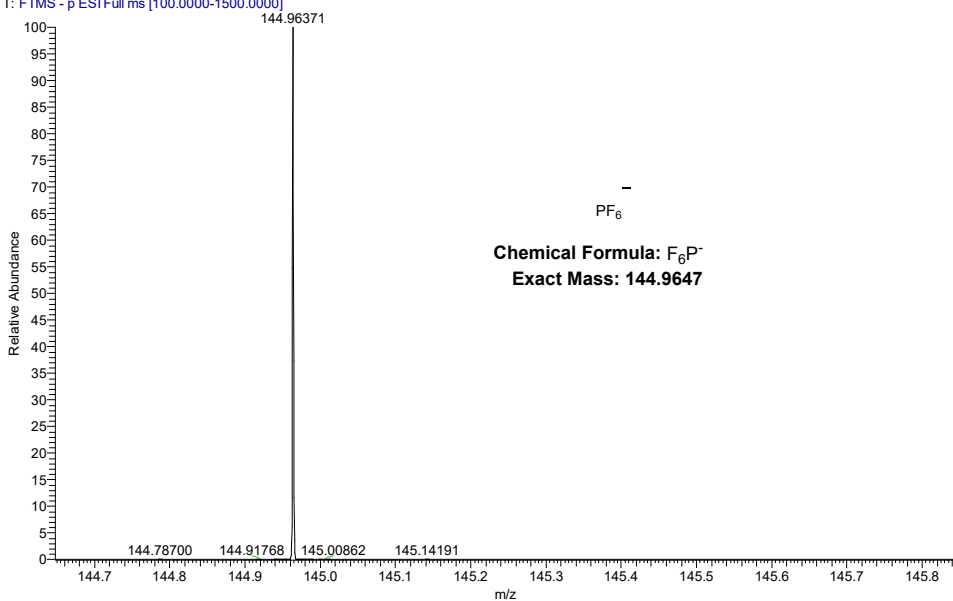

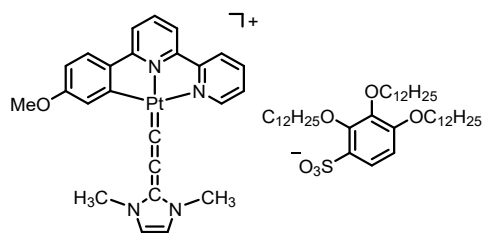

### Positive mode:

pt-3-ia #9 RT: 0.08 AV: 1 NL: 2.90E9  
T: FTMS + p ESI Full ms [100.0000-1500.0000]

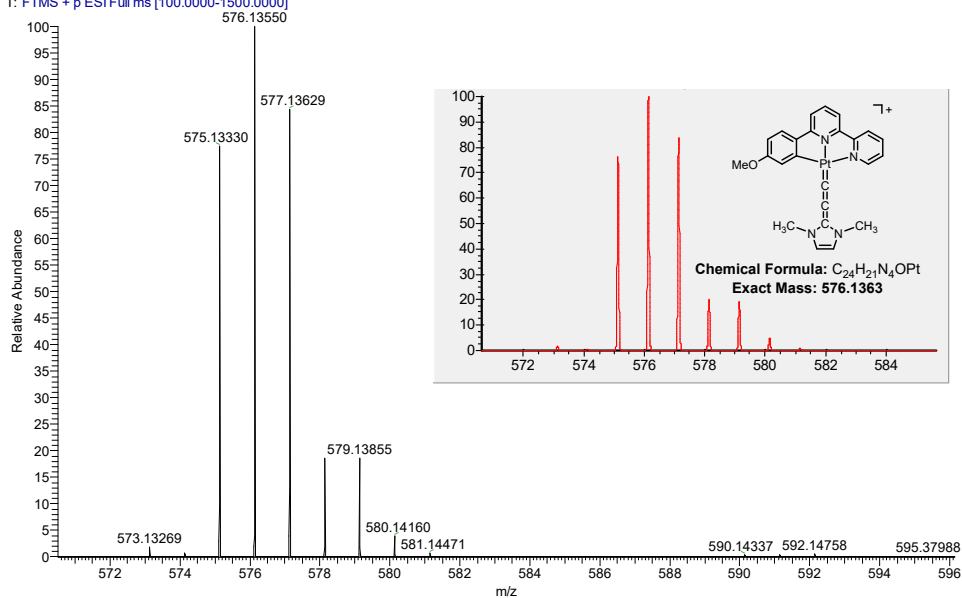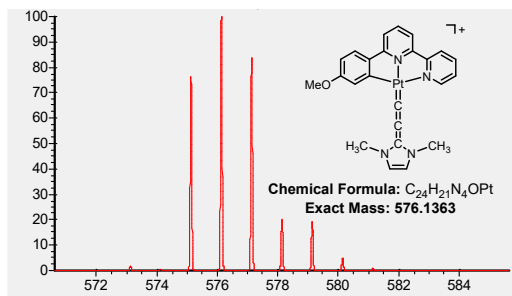

### Negative mode:

pt-3-ia #3-18 RT: 0.03-0.17 AV: 8 NL: 5.27E8  
T: FTMS - p ESI Full ms [100.0000-1500.0000]

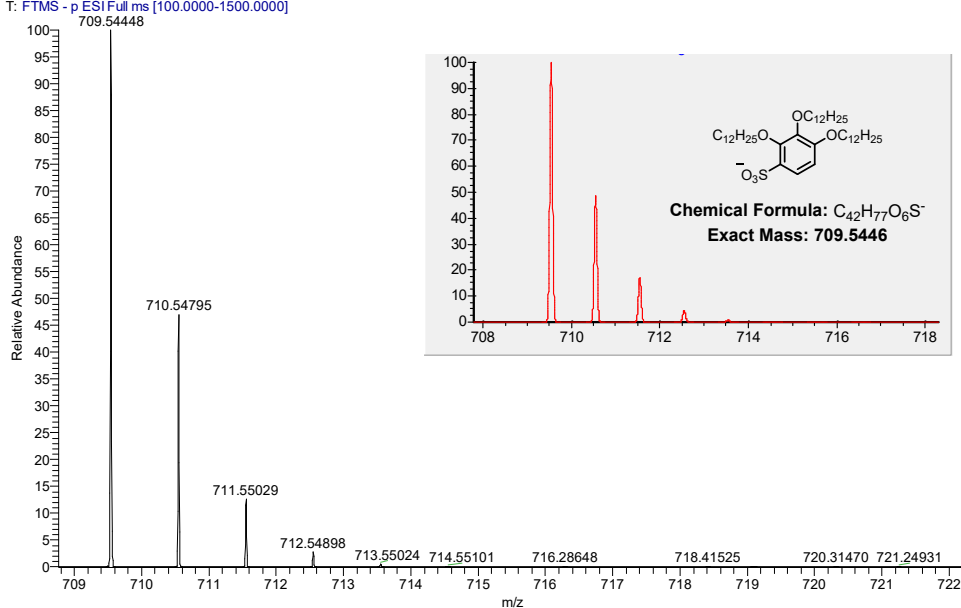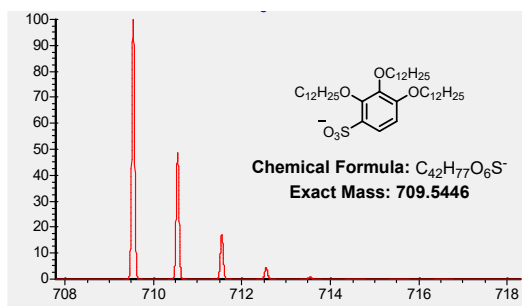

References:

1. Lu, W.; Mi, B.-X.; Chan, M. C. W.; Hui, Z.; Che, C.-M.; Zhu, N.; Lee, S.-T., *Journal of the American Chemical Society* **2004**, *126* (15), 4958-4971.
2. Stoccoro, S.; Soro, B.; Minghetti, G.; Zucca, A.; Cinellu, M. A., *Journal of Organometallic Chemistry* **2003**, *679* (1), 1-9.
3. Lin, J.; Zou, C.; Zhang, X.; Gao, Q.; Suo, S.; Zhuo, Q.; Chang, X.; Xie, M.; Lu, W., *Dalton Transactions* **2019**, *48* (28), 10417-10421.
4. Asay, M.; Donnadiou, B.; Schoeller, W. W.; Bertrand, G., *Angewandte Chemie International Edition* **2009**, *48* (26), 4796-4799.
5. Beginn, U.; Yan, L.; Chvalun, S. N.; Shcherbina, M. A.; Bakirov, A.; Möller, M., *Liquid Crystals* **2008**, *35* (9), 1073-1093.
6. Zhang, H.; Li, L.; Möller, M.; Zhu, X.; Rueda, J. J. H.; Rosenthal, M.; Ivanov, D. A., *Advanced Materials* **2013**, *25* (26), 3543-3548.
7. Zou, C.; Lin, J.; Suo, S.; Xie, M.; Chang, X.; Lu, W., *Chemical Communications* **2018**, *54* (42), 5319-5322.
8. De Greef, T. F. A.; Smulders, M. M. J.; Wolffs, M.; Schenning, A. P. H. J.; Sijbesma, R. P.; Meijer, E. W., *Chemical Reviews*, **2009**, *109* (11), 5687-5754.
9. Smulders, M. M.; Nieuwenhuizen, M. M. L.; De Greef, T. F. A.; Van der Schoot, P.; Schenning, A. P. H. J.; Meijer, E. W., *Chemistry-A European Journal*, **2010**, *16* (1), 362-367.
10. Ten Eikelder, H. M. M.; Markwoort, A. J.; De Greef, T. F. A.; Hilbers, P. A. J., *The Journal of Physical Chemistry B*, **2012**, *116* (17), 5291-5301.
11. Maarkvort, A. J.; Ten Eikelder, H. M. M.; Hilbers, P. J. J.; De Greef, T. F. A.; Meijer, E. W., *Nature Communications*, **2011**, *2*, 509-517.
12. Mayoral, M. J.; Rest, C.; Stepanenko, V.; Schellheimer, J.; Albuquerque, R. Q.; Fernandez, G., *Journal of the American Chemical Society*, **2013**, *135* (6), 2148-2151.
